# Supplementary material for: Inequity and vulnerability in Latin American Indigenous and non-Indigenous populations with rheumatic diseases: a syndemic approach
Source: PubMed Central journal article supplement — BMJ Open. 2023 Mar 23;13(3):e069246. doi: 10.1136/bmjopen-2022-069246 (PMC10040077; doi:10.1136/bmjopen-2022-069246), 2023-03-23
Supplement: bmjopen-2022-069246.draft_revisions.pdf [file bmjopen-2022-069246.draft_revisions.pdf]

# BMJ Open

BMJ Open is committed to open peer review. As part of this commitment we make the peer review history of every article we publish publicly available.

When an article is published we post the peer reviewers' comments and the authors' responses online. We also post the versions of the paper that were used during peer review. These are the versions that the peer review comments apply to.

The versions of the paper that follow are the versions that were submitted during the peer review process. They are not the versions of record or the final published versions. They should not be cited or distributed as the published version of this manuscript.

BMJ Open is an open access journal and the full, final, typeset and author-corrected version of record of the manuscript is available on our site with no access controls, subscription charges or pay-per-view fees (<http://bmjopen.bmj.com>).

If you have any questions on BMJ Open's open peer review process please email [info.bmjopen@bmj.com](mailto:info.bmjopen@bmj.com)

# BMJ Open

## INEQUITY AND VULNERABILITY IN LATIN AMERICAN INDIGENOUS AND NON-INDIGENOUS POPULATIONS WITH RHEUMATIC DISEASES :A SYNDEMIC APPROACH

|                               |                                                                                                                                                                                                                                                                                                                                                                                                                                                                                                                                                                                                                                                                                                                                                                                                                                                                                                                                                                                                                                                                                                                                                                                                                                                                                                                                             |
|-------------------------------|---------------------------------------------------------------------------------------------------------------------------------------------------------------------------------------------------------------------------------------------------------------------------------------------------------------------------------------------------------------------------------------------------------------------------------------------------------------------------------------------------------------------------------------------------------------------------------------------------------------------------------------------------------------------------------------------------------------------------------------------------------------------------------------------------------------------------------------------------------------------------------------------------------------------------------------------------------------------------------------------------------------------------------------------------------------------------------------------------------------------------------------------------------------------------------------------------------------------------------------------------------------------------------------------------------------------------------------------|
| Journal:                      | <i>BMJ Open</i>                                                                                                                                                                                                                                                                                                                                                                                                                                                                                                                                                                                                                                                                                                                                                                                                                                                                                                                                                                                                                                                                                                                                                                                                                                                                                                                             |
| Manuscript ID                 | bmjopen-2022-069246                                                                                                                                                                                                                                                                                                                                                                                                                                                                                                                                                                                                                                                                                                                                                                                                                                                                                                                                                                                                                                                                                                                                                                                                                                                                                                                         |
| Article Type:                 | Original research                                                                                                                                                                                                                                                                                                                                                                                                                                                                                                                                                                                                                                                                                                                                                                                                                                                                                                                                                                                                                                                                                                                                                                                                                                                                                                                           |
| Date Submitted by the Author: | 20-Oct-2022                                                                                                                                                                                                                                                                                                                                                                                                                                                                                                                                                                                                                                                                                                                                                                                                                                                                                                                                                                                                                                                                                                                                                                                                                                                                                                                                 |
| Complete List of Authors:     | <p>Granados, Ysabel; Hospital "Dr. Manuel Núñez Tovar," Gastelum Strozzi, Alfonso; Universidad Nacional Autonoma de Mexico, ICAT</p> <p>Alvarez-Nemegyei, Jose; Hospital Star Medica Merida Quintana, Rosana; Hospital Provincial de Rosario, Reumatology</p> <p>Julian-Santiago, Flor; Universidad Nacional Autonoma de Mexico Santos, Ana; Universidad de La Sabana, Rheumatology</p> <p>Guevara-Pacheco, Sergio; Universidad de Cuenca</p> <p>Loyola-Sanchez, Adalberto; University of Alberta Faculty of Medicine &amp; Dentistry</p> <p>Goycochea-Robles, Maria Victoria; Universidad Nacional Autonoma de Mexico, Grupo Cochrane</p> <p>Juarez, Vicente; Hospital Señor del Milagro</p> <p>Garza-Elizondo, Mario Alberto; Hospital Universitario "Dr. José Eleuterio González" de la Universidad Autónoma de Nuevo León, Internal Medicine, Rheumatology Service</p> <p>Rueda, Juan; Universidad de La Sabana, Department of Rheumatology</p> <p>Burgos-Vargas, Ruben; Hospital General de Mexico Dr Eduardo Liceaga, Rheumatology</p> <p>Londoño, John; Universidad de La Sabana, Rheumatology; Hospital Militar Central, Rheumatology</p> <p>Pons-Estel, Bernardo; Centro Regional de Enfermedades Autoinmune y Reumáticas (CREAR)</p> <p>Pelaez-Ballestas, Ingris; Hospital General de México Dr Eduardo Liceaga, Rheumatology</p> |
| Keywords:                     | EPIDEMIOLOGY, PUBLIC HEALTH, RHEUMATOLOGY, STATISTICS & RESEARCH METHODS                                                                                                                                                                                                                                                                                                                                                                                                                                                                                                                                                                                                                                                                                                                                                                                                                                                                                                                                                                                                                                                                                                                                                                                                                                                                    |
|                               |                                                                                                                                                                                                                                                                                                                                                                                                                                                                                                                                                                                                                                                                                                                                                                                                                                                                                                                                                                                                                                                                                                                                                                                                                                                                                                                                             |

SCHOLARONE™  
Manuscripts

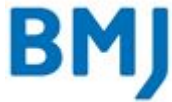

I, the Submitting Author has the right to grant and does grant on behalf of all authors of the Work (as defined in the below author licence), an exclusive licence and/or a non-exclusive licence for contributions from authors who are: i) UK Crown employees; ii) where BMJ has agreed a CC-BY licence shall apply, and/or iii) in accordance with the terms applicable for US Federal Government officers or employees acting as part of their official duties; on a worldwide, perpetual, irrevocable, royalty-free basis to BMJ Publishing Group Ltd ("BMJ") its licensees and where the relevant Journal is co-owned by BMJ to the co-owners of the Journal, to publish the Work in this journal and any other BMJ products and to exploit all rights, as set out in our [licence](#).

The Submitting Author accepts and understands that any supply made under these terms is made by BMJ to the Submitting Author unless you are acting as an employee on behalf of your employer or a postgraduate student of an affiliated institution which is paying any applicable article publishing charge ("APC") for Open Access articles. Where the Submitting Author wishes to make the Work available on an Open Access basis (and intends to pay the relevant APC), the terms of reuse of such Open Access shall be governed by a Creative Commons licence – details of these licences and which [Creative Commons](#) licence will apply to this Work are set out in our licence referred to above.

Other than as permitted in any relevant BMJ Author's Self Archiving Policies, I confirm this Work has not been accepted for publication elsewhere, is not being considered for publication elsewhere and does not duplicate material already published. I confirm all authors consent to publication of this Work and authorise the granting of this licence.

1  
2  
3  
4  
5  
6  
7  
8  
9 INEQUITY AND VULNERABILITY IN LATIN AMERICAN INDIGENOUS AND  
10 NON-INDIGENOUS POPULATIONS WITH RHEUMATIC DISEASES  
11  
12  
13 A SYNDEMIC APPROACH  
14

---

15 1. Ysabel Granados, MD.

16 ORCID: 000-0002-7148-4060

17 e-mail: [ymgranados@gmail.com](mailto:ymgranados@gmail.com)  
18  
19

20 2. Alfonso Gastelum-Strozzi, PhD,  
21  
22

23 ORCID: 0000-0001-9668-5822

24 e-mail: [alfonso.gastelum@icat.unam.mx](mailto:alfonso.gastelum@icat.unam.mx)  
25  
26  
27

28 3. José Alvarez-Nemegyei, MD, PhD.  
29  
30

31 ORCID: 0000-0002-5499-5280

32 e-mail: [nemegyei@yahoo.com.mx](mailto:nemegyei@yahoo.com.mx)  
33  
34

35 4. Rosana Quintana, MD, PhD.  
36  
37

38 ORCID: 0000-0003-0643-2755

39 e-mail: [rosanaquintana@gmail.com](mailto:rosanaquintana@gmail.com)  
40  
41

42 5. Flor Julian-Santiago , MD, PhD  
43  
44

45 ORCID: 0000-0001-6137-045X

46 e-mail: [maifjs@hotmail.com](mailto:maifjs@hotmail.com)  
47  
48  
49  
50  
51  
52  
53  
54  
55  
56  
57  
58  
59  
60

1  
2  
3  
4  
5  
6  
7  
8  
9 6. Ana María Santos, PhD

10  
11 ORCID: ORCID 0000-0002-1973-8043

12  
13 e-mail: [ana.santos@unisabana.edu.co](mailto:ana.santos@unisabana.edu.co)

14  
15  
16 7. Sergio Guevara, MD, PhD.

17  
18 ORCID: 0000-0001-5798-6200

19  
20 e-mail: [sergio\\_guevarap@yahoo.com](mailto:sergio_guevarap@yahoo.com)

21  
22  
23 8. Adalberto Loyola-Sanchez A, MD, PhD.

24  
25 ORCID: 0000-0002-0082-2907

26  
27 e-mail: [adalbert@ualberta.ca](mailto:adalbert@ualberta.ca)

28  
29  
30 9. María Victoria Goycochea-Robles, MD, MSc.

31  
32 ORCID: 0000-002-92488511

33  
34 e-mail: [mavis.goycochea@gmail.com](mailto:mavis.goycochea@gmail.com)

35  
36  
37 10. Vicente Juárez, MD.

38  
39 ORCID: 0000-0003-3865-087X

40  
41 e-mail: [vtejuarez@gmail.com](mailto:vtejuarez@gmail.com)

42  
43  
44 11. Mario Garza-Elizondo, MD, PhD

45  
46 ORCID: 0000-0002-8992-4714

47  
48 e-mail: [mariogarz@hotmail.com](mailto:mariogarz@hotmail.com)

1  
2  
3  
4  
5  
6  
7  
8  
9 12. Juan Rueda, MD, PhD candidate.

10  
11 ORCID: 0000-0002-6263-2914

12  
13 e-mail: [juan.rueda@unisabana.edu.co](mailto:juan.rueda@unisabana.edu.co)

14  
15  
16 13. Ruben Burgos-Vargas, MD.

17  
18 ORCID: 0000-0005-1058-8955

19  
20 e-mail: [burgosv@gmail.com](mailto:burgosv@gmail.com)

21  
22  
23 14. John Londoño, MD, PhD.

24  
25 ORCID: 0000-0003-1074-644X

26  
27 e-mail: [john.londono@unisabana.edu.co](mailto:john.londono@unisabana.edu.co)

28  
29  
30 15. Bernardo A. Pons-Estel, MD.

31  
32 ORCID: 0000-0003-2518-0266

33  
34 e-mail: [bponsestel@gmail.com](mailto:bponsestel@gmail.com)

35  
36  
37 16. Ingris Peláez-Ballestas, MD, PhD<sup>1</sup>

38  
39 ORCID: 0000-0001-5188-7375

40  
41 e-mail: [pelaezin@gmail.com](mailto:pelaezin@gmail.com).

42  
43 Pons-Estel B.A and Peláez-Ballestas I. on behalf of the Latin American Study Group of  
44 Rheumatic Diseases in Indigenous Peoples (GLADERPO).

45  
46  
47 Affiliations:

48  
49  
50 1. Hospital "Dr. Manuel Núñez Tovar," Maturín, Monagas, Venezuela.

- 1
- 2
- 3
- 4
- 5
- 6
- 7
- 8
- 9 2. Instituto de Ciencias Aplicadas y Tecnología, Universidad Nacional Autónoma de México,
- 10 Mexico City, Mexico.
- 11
- 12
- 13 3. Rheumatology Staff. Hospital Star Médica. Mérida, Yucatán, México
- 14
- 15 4. Centro Regional de Enfermedades Autoinmunes y Reumáticas (CREAR). Rosario, Santa
- 16 Fe, Argentina.
- 17
- 18
- 19 5. Independent researcher.
- 20
- 21
- 22 6. Grupo Espondiloartropatías .Universidad La Sabana, Bogotá, Colombia.
- 23
- 24 7. Universidad de Cuenca, Cuenca, Ecuador.
- 25
- 26 8. Faculty of Medicine and Dentistry, University of Alberta, Edmonton, Canada.
- 27
- 28
- 29 9. Grupo Cochrane-UNAM- Hospital ABC Santa Fe, Ciudad de Mexico
- 30
- 31 10. Hospital Señor del Milagro, Salta, Argentina.
- 32
- 33 11. Hospital Universitario “José Eleuterio Gonzalez,” Monterrey, Nuevo León, Mexico.
- 34
- 35
- 36 12. Grupo Espondiloartropatías. Universidad La Sabana, Bogotá, Colombia.
- 37
- 38 13. Rheumatology Unit, Hospital General de México “Dr. Eduardo Liceaga,” Mexico City,
- 39 Mexico.
- 40
- 41
- 42 14. Grupo Espondiloartropatías. Universidad La Sabana, Bogotá, Colombia.
- 43
- 44 15. Centro Regional de Enfermedades Autoinmunes y Reumáticas (CREAR). Rosario,
- 45 Santa Fe, Argentina.
- 46
- 47
- 48 16. Rheumatology Unit, Hospital General de México “Dr. Eduardo Liceaga,” Mexico City,
- 49 Mexico.
- 50
- 51

1  
2  
3  
4  
5  
6  
7  
8  
9 Corresponding author

10  
11 Pelaez-Ballestas I, Ph.D. Rheumatology Unit, Hospital General de México “Dr. Eduardo  
12 Liceaga.” Dr. Balmis 148, Colonia Doctores, 06726, Mexico City. E-mail:  
13 pelaezin@gmail.com. Phone: +52 (55) 5004-3849.  
14  
15

16  
17 **Keywords:** Rheumatic diseases, inequity, vulnerability, Syndemic, Latin America, network  
18 analysis.  
19

20  
21 **Running head:** Inequity in Latin American people with rheumatic disease  
22

### 23 **Grant**

24  
25 Dr. Bernado Pons-Estel was supported by Federico Wilhelm Agricola Foundation,  
26 Argentina.  
27

28  
29 The Asociación Colombiana de Reumatología (ASOREUMA) contributed to the financial  
30 support of this research (Acta No156, 31 May 2014).  
31

32  
33 Dr. Ingris Peláez-Ballestas was supported by National Council for Science and Technology  
34 (CONACYT)-Mexico. No. Salud 2011-01-162154. And Colegio Mexicano de  
35 Reumatología.  
36

37 Dr. Sergio Guevara-Pacheco was supported by Universidad de Cuenca, Ecuador.  
38

39 Dr. Ysabel Granados receives financial support from PDVSA East and SUELOPETROL  
40 company for logistic and transportation in Venezuela.  
41  
42  
43  
44

45 **Word count: 3850.**  
46  
47  
48  
49  
50  
51  
52  
53  
54  
55  
56  
57  
58  
59  
60



1  
2  
3  
4  
5  
6  
7  
8  
9 **Abstract.**

10  
11 Syndemics is a framework that documents health inequities and vulnerabilities in  
12 populations with rheumatic diseases. Compared to other approaches, syndemics is able to  
13 conjunctly consider epidemiological, biological, sociodemographic and economic factors,  
14 and their interactions.  
15  
16  
17

18  
19 **Objective.** To estimate health inequity and vulnerability among indigenous and non-  
20 indigenous populations with rheumatic and musculoskeletal disease (RMD) in Latin America  
21 using the syndemic approach.  
22  
23

24  
25 **Methods.** This is a secondary analysis of a previously published large-scale study on the  
26 prevalence of RMD carried out in five Latin American countries. Health inequity and  
27 vulnerability in RMD were identified through a syndemic approach using network and cluster  
28 analysis.  
29  
30  
31

32  
33 **Results.** A total of 44,560 individuals were studied: 29.78% self-identified as indigenous,  
34 60.92% were female, the mean age was 43.25 years. Twenty clusters were identified in the  
35 indigenous population and seventeen in the non-indigenous population.  
36  
37

38  
39 The variables associated with RMD among indigenous populations were rurality, public  
40 health system, high joint biomechanical stress, greater pain, disability and alcoholism; and  
41 among non-indigenous people they were being a woman, urban origin, older age, private  
42 health system, joint biomechanical stress, greater pain and disability. We identified different  
43 health inequities among RMD patients (i.e. lower educational attainment, more  
44 comorbidities), associated with factors such as indigenous self-identification and rural  
45 residence.  
46  
47  
48  
49  
50  
51

1  
2  
3  
4  
5  
6  
7  
8  
9 **Conclusion.** A syndemic approach enables us to identify health inequities in RMD, as shown  
10 by higher prevalence of comorbidities, disability and socioeconomic factors like lower  
11 educational attainment. These inequities exist for the overall population of patients with  
12 RMD, though it is more evident in indigenous groups with added layers of vulnerability.  
13  
14  
15  
16  
17  
18  
19  
20  
21  
22  
23  
24  
25  
26  
27  
28  
29  
30  
31  
32  
33  
34  
35  
36  
37  
38  
39  
40  
41  
42  
43  
44  
45  
46  
47  
48  
49  
50  
51  
52  
53  
54  
55  
56  
57  
58  
59  
60

1  
2  
3  
4  
5  
6  
7  
8  
9

- **What is already known on this topic**

10 Syndemics are a framework that has demonstrated deleterious effects on health  
11 when different diseases occur, in contexts of social deprivation and limited health  
12 systems. This has been demonstrated mostly in conditions such as HIV-AIDS,  
13 Diabetes and in RMDs in indigenous populations.  
14  
15  
16  
17

18  
19

- **What this study adds**

20 This study adds evidence of the variability of health determinants associated with  
21 having a rheumatic disease in countries with high health inequity and ethnic diversity.  
22 Using the syndemic approach and strategies from artificial intelligence (i.e., network  
23 and cluster analysis) is necessary to perform complex analyses that document health  
24 inequities comprehensively.  
25  
26  
27  
28  
29

30  
31

- **How this study might affect research, practice or policy**

32 Through the identification of specific clusters with these methods, we are able to  
33 define target populations according to common characteristics, including shared  
34 comorbidities and social determinants of health. In this way, we can design  
35 interventions and policy that move us towards true health equity, addressing the  
36 specific needs of each group instead of population-level interventions that will serve  
37 some but not all, or inefficient personalized approaches.  
38  
39  
40  
41  
42

43  
44

- **Introduction**

45 Rheumatic and musculoskeletal diseases (RMD) are a significant cause of morbidity and  
46 mortality worldwide [1]; they produce substantial socioeconomic impact and deterioration of  
47 quality of life in patients, who represent approximately 10% of the general population [2].  
48  
49  
50  
51

1  
2  
3  
4  
5  
6  
7  
8  
9 Since 2000, the World Health Organization (WHO) has recognized RMD as a relevant health  
10 problem, due to the increase in secondary disability and a greater demand for health resources  
11 [3].  
12  
13

14  
15 There is now a greater need to define global strategies for the timely access of patients with  
16 RMD to health systems [4], including the evaluation of social determinants, such as gender,  
17 education, work, income level, ethnic group and place of residence [5].  
18  
19

20  
21 Latin America is an extensive geographic area made up of 26 countries, characterized by  
22 multiculturalism and great contrasts in political, social and economic aspects [6]. Significant  
23 social inequity has been documented, with marked inequality in health coverage for  
24 individuals and social groups; these inequities are observed within and among countries in  
25 the region [7]. Epidemiological studies have documented a prevalence of RMD between 23%  
26 and 46.5% in Latin America, with more aggressive presentations, higher morbidity and  
27 mortality among indigenous populations. Genetic predisposition to systemic lupus  
28 erythematosus (SLE) has also been identified among indigenous groups [8], as well as a high  
29 prevalence of rheumatoid arthritis (RA) among indigenous Mayan groups of Yucatan,  
30 Mexico [9] and the Qom of Argentina [10].  
31  
32  
33  
34  
35  
36  
37  
38

39 Despite the high prevalence of RMDs in the Latin American region, these diseases continue  
40 to have a low priority in the planning of health policies [11]. Overall, the healthcare system  
41 in Latin America is highly fragmented and disconnected. For rheumatology care specifically,  
42 33.5% of rheumatologists work in public/government hospitals, 28.8% in private practice,  
43 20.8% in private hospitals, and 15.5% in university hospitals, most of them distributed in  
44 large urban areas, with a significant lack in small cities and none in rural areas [8].  
45  
46  
47  
48  
49  
50  
51  
52  
53  
54  
55  
56  
57  
58  
59  
60

1  
2  
3  
4  
5  
6  
7  
8  
9 These differences in disease prevalence and distribution of health resources which limit  
10 access to rheumatology care in Latin America can be understood as health inequities. Health  
11 inequity is not synonymous with inequality. Inequity implies the idea of injustice and of lack  
12 of actions to avoid *preventable* differences. On the other hand, inequality describes  
13 differences in health outcomes that are not fundamentally unfair [11]. Health inequity is  
14 deeply connected to vulnerability. From a biomedical perspective, vulnerability means being  
15 susceptible to certain diseases or to environmental risk. However, vulnerability can also be  
16 understood as a product of the interaction between available resources (personal, family,  
17 community, cultural, economic, institutional), the sociocultural context of the patient,  
18 structural elements, and exposure to risks [12]. Therefore, vulnerability is a result of health  
19 inequity.

20  
21 To document inequity in health, the syndemic model has proven useful to analyze the  
22 interaction of disease with social determinants that condition inequality in health, and how  
23 these lead to increased physical and environmental vulnerability [8,13,14]. Syndemics  
24 aggregate interaction of two or more concurrent diseases, as well as the sociocultural and  
25 healthcare contexts which can exacerbate the negative effects of this interaction on the health  
26 of individuals, communities, and societies [14,15]. The syndemic framework evaluates the  
27 interaction of any type of disease in conditions of health inequality caused by poverty,  
28 stigmatization, stress or structural violence [14,16]. Thus, syndemics encompasses social  
29 determinants, vulnerabilities, and inequities and inequalities in health as well.

30  
31 Previous studies have shown that syndemics is a good comprehensive model to document  
32 inequity and inequality in health. In a study of RMD in indigenous populations in Latin  
33 America, as well as a study of patients with low back pain, disease is associated with being  
34 a woman, belonging to an indigenous population, and having low educational attainment. It

1  
2  
3  
4  
5  
6  
7  
8  
9 is also exacerbated by the presence of comorbidities, especially those within the mental  
10 health domain [17,18].

11  
12  
13 Given the intricacy of a syndemic approach, conventional statistical methodologies are  
14 insufficient. Instead, using strategies from artificial intelligence (i.e., network and cluster  
15 analysis) is necessary to perform complex analyses that document health inequities  
16 comprehensively. The syndemic approach is useful to identify health inequities and  
17 vulnerabilities in different population groups.  
18  
19  
20  
21

22 We hypothesize that there is a syndemic in Latin American populations suffering from  
23 rheumatic diseases, associated with comorbidities such as diabetes and hypertension, and  
24 living in a fragmented health care context. We also hypothesize that this phenomenon is  
25 more significant in vulnerable populations such as indigenous peoples. Therefore, we  
26 proposed the following study to measure syndemics comparatively between indigenous and  
27 non-indigenous populations with RMD in Latin America.  
28  
29  
30  
31  
32

## 33 **MATERIALS AND METHODS**

### 34 **Design**

35  
36 This is a secondary analysis, based on multilevel network analysis using a syndemic  
37 framework, of a previously published large-scale cross-sectional study on the prevalence of  
38 RMD in five Latin American countries.  
39  
40  
41  
42

### 43 **Data sources**

44  
45 We used a database compiled by GEEMA (Grupo de Estudios Epidemiológicos de  
46 Enfermedades Músculo Articulares), COPCORD-LATAM (Community Oriented Program  
47  
48  
49  
50  
51  
52  
53  
54  
55  
56  
57  
58  
59  
60

1  
2  
3  
4  
5  
6  
7  
8  
9 for Control of Rheumatic Diseases-Latin America) and GLADERPO (Grupo Latino  
10 Americano de Estudios de Enfermedades Reumáticas en Pueblos Originarios).

11  
12  
13 GLADERPO recorded information on the Qom and Wichí indigenous populations of  
14 Argentina [10,19], Saraguro of Ecuador [20], Yucatec-Maya and Mixtec of Mexico [21] and  
15 the Chaimas, Kariñas and Warao of Venezuela [22].

16  
17  
18 COPCORD-LATAM was developed with the results of epidemiological studies conducted  
19 on the non-indigenous populations of Colombia [23], Ecuador [24], Mexico [25] and  
20 Venezuela [26], using COPCORD (Community Oriented Program for Control of Rheumatic  
21 Diseases) methodology, culturally and linguistically adapted to the different communities  
22 studied, and subsequently validated in each country.

23  
24  
25  
26  
27 The COPCORD methodology consists of trained health personnel administering a  
28 questionnaire house to house, which identifies patients with pain of non-traumatic origin,  
29 historical and in the last seven days. The participation of certified rheumatologists allowed  
30 for the diagnosis of RMDs [24–27].

31  
32  
33  
34 The same measurements were collected in all the studies: sociodemographic variables, joint  
35 biomechanical stress, comorbidities, physical disability and accessibility to local health care.  
36  
37 **Sociodemographic variables** such as age, gender, self-defined ethnicity according to the  
38 laws of each country (indigenous and non-indigenous), formal schooling (numbers of years  
39 studied in the official education system) and place of residence (urban/rural).

40  
41  
42  
43 **Level of Joint biomechanical stress** was classified according to self-reported occupation.  
44 Individuals were asked for a visual recreation of their activity, according to the degree of  
45 effort and the body regions involved. Following a survey on the level of physical load  
46 repetitiveness, each occupation was classified into three levels of joint biomechanical stress  
47  
48  
49  
50

1  
2  
3  
4  
5  
6  
7  
8  
9 in the workplace: high (e.g. farmers, homemakers, machine operators), medium (e.g. artisans,  
10 drivers, technicians) and low (e.g. merchants, professionals, students, teachers, retirees).

11 **Comorbidities** were self-reported [28,29], while physical disability was measured with the  
12 **Health Assessment Questionnaire-Disability Index (HAQ-DI)**, validated for each country  
13 and with an established cut-off point of greater than 0.8 [30].  
14

15  
16  
17 **Accessibility to the local healthcare system** was classified by conducting an exercise of  
18 comparisons and equivalences among the researchers from the five participating countries.  
19

20 Considering all characteristics of the healthcare systems, the three subgroups used to classify  
21 accessibility were: partial coverage, involving a public system that covers physician  
22 appointments, laboratory tests and basic but not high specialty medications; full coverage,  
23 involving a social security system that covers all health expenses; and private coverage,  
24 where patients pay fully for their care.  
25  
26  
27  
28  
29

### 30 31 32 **Analysis**

33 A multi-phase analysis was performed.

34  
35  
36 First, we applied descriptive statistics of sociodemographic characteristics (age, gender,  
37 formal schooling, urban/rural residence), rheumatic diagnoses, comorbidities, disability  
38 (HAQ-DI) and levels of accessibility (partial, full and private coverage). Reported with totals  
39 and percentage of the population by indigenous/non-indigenous classification and by country  
40 of origin.  
41  
42  
43

44  
45  
46 Subsequently, we performed a simple logistic regression using RMD diagnosis as a  
47 dependent variable and those described above as independent variables, reported in odds ratio  
48 (OR), confidence interval 95% (CI95%) and significance (p).  
49  
50



1  
2  
3  
4  
5  
6  
7  
8  
9 Two separate logistic regression were implemented, one for the indigenous population and  
10 another for the non-indigenous one. For both regressions the dependent variable was having  
11 a rheumatic disease. The logistic regression was perform using the logit function from  
12 statsmodels 0.14.0 [31]. The selection of the independent variables was done in a recursive  
13 way, variables were eliminated from the model when: A singular matrix was obtained, and a  
14 test for collinearity was performed to find columns with single values or low variance that  
15 could explain the singularity. Logit does not achieve convergence. Then the resulting model  
16 was evaluated to find variables with large confidence interval and P values that show non  
17 significance. Finally, the Pseudo R-Squared value of the model was evaluated, there is  
18 discussion into what is a good fit according to this value, a model was accepted when the  
19 value was equal or greater than .3 as a good fit according to McFadden [32,33]  
20  
21  
22  
23  
24  
25  
26  
27  
28

29 Finally, we used the network analysis technique [34] to evaluate the relations between  
30 individuals according to the impact of their work, the place of living and the access to care,  
31 using the following variables: accessibility level, level of joint biomechanical stress and  
32 urban/rural residence. The relation between individuals was obtained using a similarity  
33 measurement calculated using the cosine similarity method [35] and a categorical vector  
34 defined by the mentioned variables. The vector and the cosine similarity method were used  
35 to calculate the similarity index of each individual with respect to the rest of the population.  
36  
37  
38 The index was weighted by the difference of age between everyone to account for the  
39 possible relation between age and the level of joint biomechanical stress, the more similar  
40 the ages the greater the final weighted index. Finally, to introduce a measurement related to  
41 economical level another weight was calculated using the difference of year of education  
42 between individuals, For the network representation each individual is a node and a  
43  
44  
45  
46  
47  
48  
49  
50  
51  
52  
53  
54  
55  
56  
57  
58  
59  
60

1  
2  
3  
4  
5  
6  
7  
8  
9 connection edges is generated when the index of similarity between two individuals is greater  
10 than the average of the similarity indices plus standard deviation [36]. The nodes and edges  
11 tables are simulated in Gephi [37] in order to obtain a network where each node(individual)  
12 location depends on the relationships with the other nodes through the connecting edges, the  
13 final nodes position are used to defined cluster of similar nodes using the DBSCAN method  
14 [38] to define each cluster.  
15  
16  
17  
18  
19

20 Due to the complexity of representation of the clusters, a procedure was conducted to select  
21 the most relevant ones, according to group consensus on the three most important variables  
22 per the study objectives. The variables included in the model, in hierarchical order of  
23 importance, are: prevalence of RMD, prevalence of rheumatoid arthritis (RA) specifically,  
24 and number of individuals comprising the cluster. Every cluster was assigned a weighted  
25 score for each of the three selected variables by all the researchers. Finally, the six clusters  
26 included per group (indigenous and non-indigenous) were those with the highest total sum  
27 by consensus.  
28  
29  
30  
31  
32  
33  
34

35 In order to confirm there were no biases, a sub-analysis was performed based on a weighted  
36 sample, randomly selected from indigenous/non-indigenous populations from the three  
37 countries that studied both at the same time and in the same region (Ecuador, Mexico and  
38 Venezuela); two countries only had samples of indigenous (Argentina) or non-indigenous  
39 (Colombia) populations.  
40  
41  
42  
43

44 The clusters obtained through this analysis are defined by factors such as living in a rural  
45 setting, lower health coverage and greater disability, which go beyond our initial  
46 indigenous/non-indigenous classification, and which impact the management of rheumatic  
47  
48  
49  
50  
51  
52  
53  
54  
55  
56  
57  
58  
59  
60

diseases. These emerging differences can be used to document inequity insofar as they highlight the variables which negatively impact the health of people with RMD.

### Patient and Public Involvement

Patients and members of the public were involved at original stages of each study including as cultural liaisons. We disseminated the main results to all participants and health authorities to improve health conditions.

### RESULTS

A total of 44,560 individuals from five Latin American countries (Argentina, Colombia, Ecuador, Mexico and Venezuela) were studied. Of these, 29.78% (13,269) self-identified as indigenous and 27,145 (60.92%) were female, with the average age of 43.25 (SD = 18.02) years and a mean of 8.06 (SD = 5.02) years of schooling. RMD was diagnosed in 13,528 (30.36%) individuals. Rheumatic regional pain syndromes (RRPS) was the rheumatic diagnosis with the highest prevalence (6100, 13.69%) followed by osteoarthritis (3690, 8.28%), while RA was reported in (877,1.97%) individuals (Table 1).

Table 1. Comparison of sociodemographic characteristics, country, health coverage, rheumatic diagnosis, pain, disability and comorbidities between indigenous and non-indigenous groups.

|                                              | <b>Indigenous<br/>n = 13269<br/>(29.78)</b> | <b>Non-<br/>indigenous<br/>n = 31291<br/>(70.22)</b> | <b>Total<br/>n = 44560<br/>(100.00)</b> | <b>p</b> |
|----------------------------------------------|---------------------------------------------|------------------------------------------------------|-----------------------------------------|----------|
| Gender (female)                              | 8010 (60.37)                                | 19135 (61.15)                                        | 27145 (60.92)                           | 0.123    |
| Age (years), mean (SD)                       | 42.23 (18.17)                               | 43.69 (17.94)                                        | 43.25 (18.02)                           | <0.001   |
| Urban setting                                | 3877 (29.22)                                | 24331 (77.76)                                        | 28208 (63.30)                           | <0.001   |
| Educational level, mean number of years (SD) | 7.13 (5.07)                                 | 8.46 (4.95)                                          | 8.06 (5.02)                             | <0.001   |
| Countries                                    |                                             |                                                      |                                         |          |
| Argentina                                    | 2295 (17.30)                                | 0 (0.00)                                             | 2295 (5.15)                             | <0.001   |
| Colombia                                     | 234 (1.76)                                  | 6454 (20.63)                                         | 6688 (15.01)                            | <0.001   |
| Ecuador                                      | 2682 (20.21)                                | 4858 (15.53)                                         | 7540 (16.92)                            | <0.001   |

|                                                                                 |              |               |               |        |
|---------------------------------------------------------------------------------|--------------|---------------|---------------|--------|
| Mexico                                                                          | 6525 (49.17) | 16085 (51.40) | 22610 (50.74) | <0.001 |
| Venezuela                                                                       | 1533 (11.55) | 3894 (12.44)  | 5427 (12.18)  | <0.01  |
| Health coverage *                                                               |              |               |               |        |
| Full                                                                            | 3481 (26.23) | 4493 (14.36)  | 7974 (17.89)  | <0.001 |
| Partial                                                                         | 7441 (56.08) | 18314 (58.53) | 25755 (57.80) | <0.001 |
| Private                                                                         | 795 (5.99)   | 1741 (5.56)   | 2536 (5.69)   | 0.079  |
| Other**                                                                         | 330 (2.49)   | 221 (0.71)    | 551 (1.24)    | <0.001 |
| Joint biomechanical stress ***                                                  |              |               |               |        |
| High                                                                            | 5000 (37.68) | 10199 (32.59) | 15199 (34.11) | <0.001 |
| Medium                                                                          | 1538 (11.59) | 4720 (15.08)  | 6258 (14.04)  | <0.001 |
| Low                                                                             | 4014 (30.25) | 9213 (29.44)  | 13227 (29.68) | 0.090  |
| Unspecified                                                                     | 1815 (13.68) | 2784 (8.90)   | 4599 (10.32)  | <0.001 |
| Rheumatic disease                                                               |              |               |               |        |
| Totals                                                                          | 4012 (30.24) | 9516 (30.41)  | 13528 (30.36) | 0.721  |
| Osteoarthritis                                                                  | 1433 (10.80) | 2257 (7.21)   | 3690 (8.28)   | <0.001 |
| Rheumatoid arthritis                                                            | 278 (2.10)   | 599 (1.91)    | 877 (1.97)    | 0.223  |
| Back pain                                                                       | 1548 (11.67) | 1281 (4.09)   | 2829 (6.35)   | <0.001 |
| RRPS                                                                            | 505 (3.81)   | 5595 (17.88)  | 6100 (13.69)  | <0.001 |
| Musculoskeletal disorders                                                       | 521 (3.93)   | 664 (2.12)    | 1185 (2.66)   | <0.001 |
| Fibromyalgia                                                                    | 181 (1.36)   | 212 (0.68)    | 393 (0.88)    | <0.001 |
| Other ****                                                                      | 45 (0.34)    | 118 (0.38)    | 163 (0.37)    | 0.602  |
| Pain                                                                            |              |               |               |        |
| Historical pain                                                                 | 5408 (40.76) | 11780 (37.65) | 17188 (38.57) | <0.001 |
| Non-traumatic pain (7 days)                                                     | 2258 (17.02) | 8024 (25.64)  | 10282 (23.07) | <0.001 |
| Physical disability (Health Assessment Questionnaire-Disability Index (HAQ-DI)) |              |               |               |        |
| HAQ-DI $\geq$ 0.8                                                               | 761 (5.74)   | 2558 (8.17)   | 3319 (7.45)   | <0.001 |
| Comorbidities                                                                   |              |               |               |        |
| Diabetes mellitus                                                               | 814 (6.13)   | 2279 (7.28)   | 3093 (6.94)   | <0.001 |
| High blood pressure                                                             | 1649 (12.43) | 5613 (17.94)  | 7262 (16.30)  | <0.001 |
| Cardiovascular disease                                                          | 415 (3.13)   | 1106 (3.53)   | 1521 (3.41)   | 0.033  |
| Smoking                                                                         | 1138 (8.58)  | 4996 (15.97)  | 6134 (13.77)  | <0.001 |
| Alcoholism                                                                      | 1751 (13.20) | 1068 (3.41)   | 2819 (6.33)   | <0.001 |
| Anxiety/depression                                                              | 2304 (17.36) | 3727 (11.91)  | 6031 (13.53)  | <0.001 |
| No comorbidities                                                                | 6391 (48.16) | 14450 (46.18) | 20841 (46.77) | <0.001 |

\* Missing data: 1222 (9.21%) indigenous and 6522 (20.84%) not indigenous, total 7744 (17.38%)

\*\* Other: Traditional healthcare

\*\*\* Missing data: 902 (7.01%) indigenous and 4375 (13.80%) not indigenous.

\*\*\*\* Others: *Indigenous*: 29 ankylosing spondylitis, 9 gout, 4 scleroderma and 3 psoriasis. *Non-indigenous*: 39 ankylosing spondylitis, 74 gout, 1 scleroderma and 4 psoriasis.

A lower urban origin (18.71%) and less years of formal schooling (6.74, SD = 5.71) were observed in the indigenous population, while the non-indigenous population had a predominance of private coverage (10.89%). High joint biomechanical stress (47.01%) and historical pain (39.99%) were more frequent in indigenous populations. The prevalence of RMD was similar between populations studied; RA was more prevalent in indigenous people (2.26% vs 1.74%), but not significantly. Non-indigenous people had greater disability (8.15% with HAQ  $\geq$  0.8) and higher prevalence of diabetes mellitus, high blood pressure and smoking

(7.09%, 18.59% and 15.16%). Among indigenous people, alcohol consumption and anxiety/depression were more prevalent (13.98% and 19.55%) (see supplementary table).

In terms of the sub-analysis by country, Argentina had the youngest individuals (35.98, SD:=14.25); Ecuador and Colombia recorded a higher level of schooling (9.31, SD= 5.49) and a higher prevalence of RMD (47.69% and 40.76%); Argentina and Mexico had the highest prevalence of RA (3.01% and 2.22%); Colombia had a higher prevalence of historical and non-traumatic pain (73.95% and 43.94%); and Ecuador had the highest number of disabled people (8.70% with HAQ  $\geq$ 0.8) (Table 2).

Table 2. Comparison of sociodemographic characteristics, health coverage, rheumatic diagnosis, pain, disability, and comorbidities between populations of five Latin American countries.

|                                              | Argentina<br>n (%)<br>n = 2295 (5.15) | Colombia<br>n (%)<br>n = 6688<br>(15.01) | Ecuador<br>n (%)<br>n = 7540<br>(16.92) | Mexico<br>n (%)<br>n = 22610 (50.74) | Venezuela<br>n (%)<br>n = 5427<br>(12.18) | Totals*<br>n (%)<br>n = 44560<br>(100.00) | p      |
|----------------------------------------------|---------------------------------------|------------------------------------------|-----------------------------------------|--------------------------------------|-------------------------------------------|-------------------------------------------|--------|
| Ethnicity (indigenous)                       | 2295 (100.00)                         | 234 (3.50)                               | 2682 (35.57)                            | 6525 (28.86)                         | 1533 (28.25)                              | 13269 (29.78)                             | <0.001 |
| Gender (female)                              | 1393 (60.70)                          | 4280 (64.00)                             | 4590 (60.88)                            | 13634 (60.30)                        | 3248 (59.85)                              | 27145 (60.92)                             | <0.001 |
| Age (years), mean (SD)                       | 35.98 (14.25)                         | 46.41 (18.35)                            | 43.39 (18.60)                           | 43.08 (17.93)                        | 42.98 (17.63)                             | 43.25 (18.02)                             | <0.001 |
| Urban setting                                | 0 (0.00)                              | 6688 (100.00)                            | 3384 (44.88)                            | 14242 (62.99)                        | 3894 (71.75)                              | 28208 (63.30)                             | <0.001 |
| Educational level, mean number of years (SD) | 5.43 (3.60)                           | 9.19 (4.00)                              | 9.31 (5.49)                             | 7.41 (4.98)                          | 8.77 (5.27)                               | 8.06 (5.02)                               | <0.001 |
| Health coverage *                            |                                       |                                          |                                         |                                      |                                           |                                           |        |
| Total                                        | 2295 (100.00)                         | 6527 (97.60)                             | 5453 (72.32)                            | 17114 (75.70)                        | 5427 (100.00)                             | 36816 (82.62)                             |        |
| Full                                         | 29 (1.26)                             | 1920 (28.71)                             | 3148 (41.75)                            | 2877 (12.72)                         | 0 (0.00)                                  | 7974 (17.89)                              | <0.001 |
| Partial                                      | 2053 (89.46)                          | 4465 (66.76)                             | 405 (5.37)                              | 13674 (60.48)                        | 5158 (95.04)                              | 25755 (57.80)                             | <0.001 |
| Private                                      | 183 (7.97)                            | 39 (0.58)                                | 1482 (19.66)                            | 563 (2.49)                           | 269 (4.96)                                | 2536 (5.69)                               | <0.001 |
| Other**                                      | 30 (1.31)                             | 103 (1.54)                               | 418 (5.54)                              | 0 (0.00)                             | 0 (0.00)                                  | 551 (1.24)                                | <0.001 |
| Joint biomechanical stress ***               |                                       |                                          |                                         |                                      |                                           |                                           |        |
| Totals                                       | 1698 (74.00)                          | 6686 (99.97)                             | 7440 (98.67)                            | 20253 (89.58)                        | 3206 (59.08)                              | 39283 (88.16)                             |        |
| High                                         | 420 (18.30)                           | 3511 (52.50)                             | 3382 (44.85)                            | 6667 (29.49)                         | 1219 (22.46)                              | 15199 (34.11)                             | <0.001 |
| Medium                                       | 159 (6.93)                            | 1569 (23.46)                             | 516 (6.84)                              | 3438 (15.21)                         | 576 (10.61)                               | 6258 (14.04)                              | <0.001 |
| Low                                          | 120 (5.23)                            | 1604 (23.98)                             | 3510 (46.55)                            | 6684 (29.56)                         | 1309 (24.12)                              | 13227 (29.68)                             | <0.001 |
| Unspecified                                  | 999 (43.53)                           | 2 (0.03)                                 | 32 (0.42)                               | 3464 (15.32)                         | 102 (1.88)                                | 4599 (10.32)                              | <0.001 |
| Rheumatic disease                            |                                       |                                          |                                         |                                      |                                           |                                           |        |
| Totals                                       | 705 (30.72)                           | 2726 (40.76)                             | 3596 (47.69)                            | 5092 (22.52)                         | 1409 (25.96)                              | 13528 (30.36)                             | <0.001 |

|                                                                                 |             |              |              |               |              |               |        |
|---------------------------------------------------------------------------------|-------------|--------------|--------------|---------------|--------------|---------------|--------|
| Osteoarthritis                                                                  | 88 (3.83)   | 521 (7.79)   | 470 (6.23)   | 1797 (7.95)   | 814 (15.00)  | 3690 (8.28)   | <0.001 |
| Rheumatoid arthritis                                                            | 69 (3.01)   | 84 (1.26)    | 120 (1.59)   | 501 (2.22)    | 103 (1.90)   | 877 (1.97)    | <0.001 |
| Back pain                                                                       | 460 (20.04) | 237 (3.54)   | 474 (6.29)   | 1357 (6.00)   | 301 (5.55)   | 2829 (6.35)   | <0.001 |
| RRPS                                                                            | 41 (1.79)   | 2726 (40.76) | 2671 (35.42) | 461 (2.04)    | 201 (3.70)   | 6100 (13.69)  | <0.001 |
| Musculoskeletal disorders                                                       | 50 (2.18)   | 0 (0.00)     | 62 (0.82)    | 1013 (4.48)   | 60 (1.11)    | 1185 (2.66)   | <0.001 |
| Fibromyalgia                                                                    | 3 (0.13)    | 27 (0.40)    | 214 (2.84)   | 126 (0.56)    | 23 (0.42)    | 393 (0.88)    | <0.001 |
| Other ****                                                                      | 2 (0.09)    | 26 (0.39)    | 32 (0.42)    | 80 (0.35)     | 23 (0.42)    | 163 (0.37)    | 0.179  |
| Pain                                                                            |             |              |              |               |              |               |        |
| Historical pain                                                                 | 938 (40.87) | 4946 (73.95) | 3420 (45.36) | 6141 (27.16)  | 1743 (32.12) | 17188 (38.57) | <0.001 |
| Non-traumatic pain (7 days)                                                     | 402 (17.52) | 2939 (43.94) | 1525 (20.23) | 4204 (18.59)  | 1212 (22.33) | 10282 (23.07) | <0.001 |
| Physical disability (Health Assessment Questionnaire-Disability Index (HAQ-DI)) |             |              |              |               |              |               |        |
| HAQ $\geq$ 0.8                                                                  | 95 (4.14)   | 400 (5.98)   | 656 (8.70)   | 1741 (7.70)   | 427 (7.87)   | 3319 (7.45)   | <0.001 |
| Comorbidities                                                                   |             |              |              |               |              |               |        |
| Diabetes mellitus                                                               | 125 (5.45)  | 428 (6.40)   | 382 (5.07)   | 1898 (8.39)   | 260 (4.79)   | 3093 (6.94)   | <0.001 |
| High blood pressure                                                             | 379 (16.51) | 1591 (23.79) | 1046 (13.87) | 3078 (13.61)  | 1168 (21.52) | 7262 (16.30)  | <0.001 |
| Cardiovascular disease                                                          | 144 (6.27)  | 435 (6.50)   | 250 (3.32)   | 471 (2.08)    | 221 (4.07)   | 1521 (3.41)   | <0.001 |
| Smoking                                                                         | 497 (21.66) | 2409 (36.02) | 1587 (21.05) | 1080 (4.78)   | 561 (10.34)  | 6134 (13.77)  | <0.001 |
| Alcoholism                                                                      | 379 (16.51) | 0 (0.00)     | 470 (6.23)   | 1523 (6.74)   | 447 (8.24)   | 2819 (6.33)   | <0.001 |
| Anxiety/depression                                                              | 123 (5.36)  | 1463 (21.88) | 1843 (24.44) | 2185 (9.66)   | 417 (7.68)   | 6031 (13.53)  | <0.001 |
| No comorbidities                                                                | 882 (38.43) | 2483 (37.13) | 2460 (32.63) | 12471 (55.16) | 2545 (46.90) | 20841 (46.77) | <0.001 |

\* Missing data: 7744 (17.38)

\*\*Other: Traditional healthcare

\*\*\* Missing data: 5277 (11.84)

\*\*\*\* Others: Ankylosing spondylitis, gout, scleroderma, psoriasis.

A logistic regression analysis was performed by ethnicity. In the indigenous population, the variables significantly associated with RMD diagnosis were living in a rural setting, younger age, relying on the public health system for treatment, high levels of joint biomechanical stress, greater pain and greater disability. In turn, the variables associated with RMD diagnosis in the non-indigenous population were being a woman, living in an urban setting, older age, relying on the private sector for treatment, more frequent joint biomechanical stress regardless of the level, greater pain, greater disability and less association with having diabetes mellitus (Table 3).

Table 3. Logistic regression. Dependent variable: a rheumatic disease. Independent variables: gender, place of residence, age, schooling, health coverage, biomechanical stress, pain, functional capacity, and comorbidities.

|                                     | Indigenous            |        | Non-indigenous        |        |
|-------------------------------------|-----------------------|--------|-----------------------|--------|
|                                     | OR (95% CI two-sided) | P      | OR (95% CI two-sided) | P      |
| Intercept                           | 0.02 (0.01 - 0.03)    | < 0.01 | 0.10 (0.08 - 0.12)    | < 0.01 |
| Gender (female)                     | 1.10 (0.96 - 1.25)    | 0.164  | 1.19 (1.11 - 1.27)    | < 0.01 |
| Age (years)                         | 0.49 (0.41 - 0.59)    | < 0.01 | 1.49 (1.37 - 1.62)    | < 0.01 |
| Urban setting                       | 1.02 (1.02 - 1.02)    | < 0.01 | 1.00 (1.00 - 1.01)    | < 0.01 |
| Educational level                   | 0.99 (0.97 - 1.00)    | 0.051  | 1.01 (1.00 - 1.01)    | 0.081  |
| Health coverage                     |                       |        |                       |        |
| Full                                | 1.46 (1.11 - 1.91)    | < 0.01 | 0.82 (0.74 - 0.91)    | < 0.01 |
| Partial                             | 1.15 (0.88 - 1.50)    | 0.322  | 0.59 (0.55 - 0.64)    | < 0.01 |
| Private                             | 1.55 (1.10 - 2.19)    | 0.013  | 1.43 (1.25 - 1.64)    | < 0.01 |
| Other                               | 1.36 (0.87 - 2.13)    | 0.172  | 0.98 (0.70 - 1.36)    | 0.900  |
| Level of joint biomechanical stress |                       |        |                       |        |
| High                                | 1.18 (1.00 - 1.40)    | 0.054  | 1.55 (1.41 - 1.69)    | < 0.01 |
| Medium                              | 1.22 (0.96 - 1.56)    | 0.110  | 1.31 (1.17 - 1.46)    | < 0.01 |
| Low                                 | 1.17 (0.97 - 1.42)    | 0.101  | 1.52 (1.38 - 1.66)    | < 0.01 |
| Pain                                |                       |        |                       |        |
| Historical pain                     | 27.77 (24.09 - 32.01) | < 0.01 | 3.84 (3.59 - 4.11)    | < 0.01 |

|                                                                                 |                    |        |                    |        |
|---------------------------------------------------------------------------------|--------------------|--------|--------------------|--------|
| Non-traumatic pain (7 days)                                                     | 2.51 (2.18 - 2.89) | < 0.01 | 2.26 (2.11 - 2.43) | < 0.01 |
| Physical disability (Health Assessment Questionnaire-Disability Index (HAQ-DI)) |                    |        |                    |        |
| HAQ $\geq$ 0.8                                                                  | 1.25 (1.00 - 1.56) | 0.045  | 1.37 (1.23 - 1.52) | < 0.01 |
| Comorbidities                                                                   |                    |        |                    |        |
| Diabetes mellitus                                                               | 0.95 (0.75 - 1.20) | 0.653  | 0.82 (0.73 - 0.93) | < 0.01 |
| High blood pressure                                                             | 0.98 (0.82 - 1.18) | 0.842  | 0.95 (0.87 - 1.03) | 0.226  |
| Cardiovascular disease                                                          | 0.83 (0.62 - 1.12) | 0.219  | 1.06 (0.91 - 1.24) | 0.433  |
| Smoking                                                                         | 0.93 (0.74 - 1.16) | 0.504  | 1.06 (0.97 - 1.16) | 0.217  |
| Alcoholism                                                                      | 0.78 (0.64 - 0.94) | < 0.01 | 1.15 (0.97 - 1.37) | 0.107  |
| Anxiety/depression                                                              | 0.99 (0.84 - 1.17) | 0.926  | 1.05 (0.96 - 1.16) | 0.266  |
| No comorbidities                                                                | 0.87 (0.74 - 1.03) | 0.111  | 0.73 (0.67 - 0.80) | < 0.01 |

Twenty clusters were identified in the indigenous population and seventeen in the non-indigenous population. In order to best represent the results, six clusters were selected for each group, using consensus and weighing as described in the methodology.

The six clusters selected from the indigenous population were: Cluster 1 was represented by individuals with partial coverage, younger, with lower educational attainment, higher prevalence of RA and low back pain, and higher pain and smoking. Cluster 11 included individuals with full coverage, greater functional limitation, and higher prevalence of RA and anxiety/depression. Cluster 13 was represented by individuals with less schooling and a high percentage of smoking and alcoholism. Cluster 14 was represented by individuals with full coverage, high prevalence of RMD, and higher percentage of anxiety/depression and pain. Cluster 15 was the largest, with partial coverage, high level of joint biomechanical stress, and higher prevalence of RMD and associated pain. Lastly, Cluster 16 was the smallest and included individuals with private coverage, high level of joint biomechanical stress, older



1  
2  
3  
4  
5  
6  
7  
8  
9 age, anxiety/depression and alcoholism, and the highest prevalence of RMD and associated  
10 pain out of all the clusters (Figure 1).

11  
12  
13 In the non-indigenous population, the six selected clusters were: Cluster 4 was the largest,  
14 represented by individuals with partial coverage, high level of joint biomechanical stress,  
15 higher percentage of pain, and higher prevalence of RMD, high blood pressure and  
16 anxiety/depression. Cluster 7 was the smallest, with a low percentage of pain and RMD, but  
17 greater physical disability. Cluster 8 included individuals with less years of formal  
18 schooling, partial health coverage, higher prevalence of RMD and anxiety/depression,  
19 medium level of joint biomechanical stress, and high physical disability.

20  
21  
22 Cluster 9 included individuals with higher educational attainment, full coverage, higher  
23 prevalence of RRPS, greater pain, greater level of smoking and less disability. Cluster 10  
24 was represented by individuals with partial coverage, and lower prevalence of RMD and  
25 associated pain, but with greater limitation. Cluster 17 included only Mexican individuals  
26 with partial coverage, high level of joint biomechanical stress, lower educational attainment,  
27 and higher prevalence of RA, diabetes mellitus and high blood pressure (Figure 2).

## 28 29 30 31 32 33 34 35 36 37 **DISCUSSION**

38  
39 The syndemic approach analyzes the synergistic interrelationship between different  
40 biological and non-biological factors that lead to disease. The application of this approach to  
41 the area of health is relatively recent. Multiple studies describe how epidemiological and  
42 socioeconomic factors are related to disability and inequity in patients with RMD [39].  
43 However, there are few publications that evaluate inflammatory joint diseases and other  
44 chronic musculoskeletal conditions from a broader social and biocultural context, taking into  
45  
46  
47  
48  
49  
50  
51  
52  
53  
54  
55  
56  
57  
58  
59  
60

1  
2  
3  
4  
5  
6  
7  
8  
9 consideration how the socioeconomic characteristics of the environment interact with the  
10 disease.

11  
12  
13 In the present study, a syndemic approach was used to identify factors associated with health  
14 inequity [18,40]. The results obtained through a complex analysis of networks showed a  
15 greater clustering of patients with rheumatic diseases who shared common social  
16 determinants, such as rural setting and lower schooling. This coincides with the results  
17 published by Norton et al, who have described that the greater the comorbidities, the greater  
18 the risk of a negative impact on the evolution of RMD [41] and, consequently, the greater the  
19 difficulty to adequately control the disease [42].

20  
21  
22 This study identified factors associated with inequity in individuals with RMD in five Latin  
23 American countries with a syndemic approach. The clusters obtained through our analysis  
24 show differential negative impacts in the groups that were formed. The relevant emerging  
25 factors are living in rural communities, having lower educational attainment, and depending  
26 on the public healthcare system, described as fragmented in all participating countries.  
27 Comorbidities such as smoking, alcoholism and those related to mental health  
28 (anxiety/depression) are most prevalent overall, and greater in the indigenous population.  
29 The differences detected through the clusters can be considered health inequities, since they  
30 constitute avoidable differences such as low schooling and a health care system without full  
31 coverage. Furthermore, the clusters that have greater impact are those which include  
32 indigenous people. All of the above attests to the inequity in RMD in low- and middle-income  
33 countries in general, and even more so in historically vulnerable populations, such as  
34 indigenous groups.

Commented [AMdLyR1]: Asociación de qué?

1  
2  
3  
4  
5  
6  
7  
8  
9 Multiple reports describe disparity and inequity among patients with RMD. Though they  
10 contemplate the interaction of disease with epidemiological, biological and socioeconomic  
11 factors, most of the research of this phenomenon does not include a conjunct and  
12 comprehensive analysis of all factors as is achieved by syndemics [43,44].  
13  
14  
15

16  
17 Another important finding of the study is the clusters with higher prevalence of  
18 comorbidities, particularly high blood pressure, tobacco, and alcohol consumption, and those  
19 related to mental health (anxiety/depression). As previously reported, the greater the  
20 comorbidity, the greater the risk of negative impact on the evolution of RMD [45]. The  
21 coexistence of two or more conditions prevents the proper control of disease activity,  
22 hindering the achievement of therapeutic goals like those proposed by the treat to target  
23 recommendations [46].  
24  
25  
26  
27  
28

29  
30 The coexistence of several chronic conditions involving systemic inflammatory processes  
31 and deterioration in functional capacities, leads to a greater impact on the quality of life and  
32 greater demand of health services, to which many populations in Latin America have no  
33 universal access. Indeed, the results of this analysis identified several clusters with partial or  
34 no access to medical care coinciding with greater comorbidity (cluster 1, 10,11). The  
35 association between RMD severity and comorbidities as biological interactions is clear, but  
36 it is important to correlate these at a social level, since not having access to timely diagnoses  
37 or specialized care increases the possibility of greater comorbidity and complications.  
38  
39  
40  
41  
42  
43

44 Additionally, it is important to address the interaction of certain prevalent comorbidities—  
45 smoking, alcoholism, and mental health struggles—which contribute to the syndemic as both  
46 social and biological factors. While there is sufficient evidence to suggest the possibility of  
47 common pathophysiological mechanisms with inflammatory joint diseases, it has also been  
48  
49  
50  
51  
52

1  
2  
3  
4  
5  
6  
7  
8  
9 shown that states of anxiety and depression can be triggered by non-biological factors such  
10 as social isolation, poverty, mental health worldview or cultural stigmatization, and/or lack  
11 of access to healthcare [39].  
12  
13

14  
15 When comparing inequity between population groups, the poverty rate in indigenous and  
16 rural communities is higher, as reported in this study: 29.78% of the population self-identified  
17 as indigenous, with a higher level of individuals from rural areas and fewer years of  
18 schooling. The prevalence of RA specifically was more pronounced in the indigenous  
19 population, with the highest rates in Argentina and Mexico (3.01% and 2.22%) (17, 20).  
20  
21 Previous research has similarly found that RMD are more frequent in the indigenous  
22 populations than in the non-indigenous populations of Canada, Australia, New Zealand and  
23 the United States [10].  
24  
25  
26  
27  
28

29  
30 The indigenous population had a lower prevalence of disability despite presenting greater  
31 high level of joint biomechanical stress, historical pain and RA, which may be related to a  
32 worldview favoring normalization or underestimation of symptoms. In addition, the  
33 interpretation of these symptoms may be one of the causes of delay in seeking specialized  
34 care [41]. The relationship between ethnicity and health outcomes seems to be influenced by  
35 acculturation; that is, when one ethnic group is forced to adopt the beliefs and practices of  
36 another, the members develop negative health behaviors as coping mechanisms [47].  
37  
38  
39  
40  
41

42  
43 Health systems in Latin America are diverse and complex. Individuals in this study are  
44 distributed among the spectrum of public (partial or full) and private systems. Most  
45 indigenous communities have public health coverage, though this does not guarantee access  
46 or continuity of care and treatment. Limited access is not merely due to economic barriers,  
47 but also related to ethnic, cultural and geographical factors, among others [17,18,42,43].  
48  
49  
50

1  
2  
3  
4  
5  
6  
7  
8  
9 Indigenous communities are among the most vulnerable groups and, due to the conditions  
10 described above, their inclusion into the healthcare system is complex [41,42,48].

11  
12  
13 The inaccessibility of the healthcare system, socioeconomic conditions, presence of  
14 comorbidities involving mental health, and RMD disease activity, are all factors that exist in  
15 interacting layers to create specific conditions of vulnerability for different patient  
16 populations. A model of vulnerability in layers, called a palimpsest design [12], analyzes  
17 how the determinants of health at different levels—genetic, biological, psychological, social  
18 and political—interact over time, creating barriers that lead to health inequity. The syndemic  
19 approach, in taking into consideration all factors and their interactions conjunctly,  
20 corresponds with a palimpsest model, providing evidence for the vulnerability of RMD  
21 patients associated with social factors such as rurality, low educational attainment, and  
22 greater reliance on the public health system (Figure 3).  
23  
24  
25  
26  
27  
28  
29  
30

### 31 Limitations

32  
33  
34 The cross-sectional nature of this study is a limitation to establish causality. However, the  
35 analysis of clusters and networks groups individuals by variables to document inequity—the  
36 principal objective of this study.  
37  
38

39  
40 Another limitation is the documentation of comorbidities by self-reporting, which can  
41 condition a measurement error. However, in most studies an attempt was made to verify the  
42 comorbidities through the medications/prescriptions individuals showed researchers.  
43  
44

45  
46 In conclusion, the complex analysis from a syndemic approach allowed us to identify the  
47 greatest inequity in the clusters that group younger individuals, residents of rural areas, those  
48 who self-identify as indigenous, have lower educational attainment, higher prevalence of  
49  
50

1  
2  
3  
4  
5  
6  
7  
8  
9 RMD and RA specifically, greater comorbidities especially related to mental health and high  
10 blood pressure, and partial coverage in the public healthcare system. Given the above we can  
11 assume that these social vulnerabilities and comorbidities lead to health inequities for  
12 populations living in countries in which RMD are not considered a priority, resulting in lack  
13 of coverage for prevention, diagnosis and management.  
14  
15  
16  
17  
18  
19  
20

## 21 **Acknowledgments**

22  
23 We thank all the participating communities and their authorities for allowing this study  
24 to be conducted. We also thank all primary care physicians who collaborated in the study.  
25  
26 Amaranta Manrique de Lara for her critical reading, comments and editing.  
27  
28

29 We also thank all the researcher:

30 **Argentina:** Mario Goñi, Nora Mathern, Marisa Jorfen, Silvana Conti, Romina Nieto, Alvaro  
31 Sanabria, Cristina Prigione, Adriana M. R. Silvestre, Vanina García, Julio Miljevic, Daniel  
32 Dhair, Matias Laithe, Fadia Midauar, Maria Celeste Martin, Maria Cecilia Barrios, Vicente,  
33 María Elena Crespo, Mariana Aciar, Emilio Buschiazzo, Natalia L Cucchiario, Eugenia Picco,  
34 Mario Ruiz , José Adolfo Sánchez, Rodolfo Franco, Natalia Estrella, Silvia Jorge, Cinthya  
35 Retamozo, Sofia Fernandez, Martina Fay, Cecilia Camacho, Graciela Gomez, Jazmin  
36 Petrelli, Andrés Honeri, Viviana Arenas Solórzano, Ana Bensi, Maria Elena Calvo, Marcela  
37 Valdata.

38 **Colombia:** Rodrigo Giraldo, Ignacio Angarita, Jesus G. Ballesteros, Sofia Arias, Andres  
39 Vásquez, Lina Valero, Ani Cortes, Estafania Castañeda, Elias Forero.

40 **Ecuador:** Astrid Feicán, Fernando Vintimilla, Jaime Vintimilla, Veronica Ochoa, Jorge  
41 Delgado, Angelita Lliguisaca, Holger Dután.

42 **México:** Mario H. Cardiel, Jacqueline Rodríguez-Amado, Julio Casasola-Vargas, Conrado  
43 García, Imelda García-Olivera, Natalia Santana, César Pacheco, Susana Aidee Gonzalez-  
44 Chávez, Hazel Garcia Morales, Arturo Velasco Gutierrez, JF Moctezuma-Rios, Everardo  
45 Álvarez-Hernández, Eduardo Navarro-Zarza, Angelia Angulo, Rosana Flores, Janeth Galván  
46 Padrón, Lorena Pérez B, Janett Riega Brenda Vaquez Fuentes, Miguel A  
47 Villarreal, Cassandra Skinner Taylor, Sara Marín, Dionicio Galarza Delgado, Diana Flores  
48 Alvarado, Jorge A. Esquivel Varerio, Luz Helena Sanín, Marco Maradiaga Ceceño, Jorge  
49 Zamudio Lerm.

1  
2  
3  
4  
5  
6  
7  
8  
9 **Venezuela:** Ysabel Granados, Rosa Chacón, Ivan Stekman, Yanira Martínez, Gloris Sánchez, Celenia Rosillo, Ligia Cedeño.

10  
11  
12  
13 **Contributors:** All authors were involved in the study design, data analysis, and revision of  
14 the manuscript. All authors read and approved the final manuscript. IPB is the guarantor.

15  
16  
17 **Competing interests:** Authors had no conflicts to disclose. Non-financial associations that  
18 may be relevant to the submitted manuscript.

19  
20 **Founding:** Federico Wilhelm Agricola Foundation, N/A. Argentina.

21 Asociacion Colombiana de Reumatologia (ASOREUMA), No156. Colombia.

22 Colegio Mexicano de Reumatología, N/A. México.

23 National Council for Science and Technology (CONACYT)-Mexico. Salud 2011-01-  
24 162154, Mexico

25 PDVSA East and SUELOPETROL, N/A. Venezuela.

26 Universidad de Cuenca, N/A. Ecuador.

27  
28 **Patient and Public Involment:** Patients or the public WERE NOT involved in the design,  
29 or conduct, or reporting, or dissemination plans of our research

30  
31 **Data sharing.** The data are available but must be requested from the  
32 researcher IPB through a specific application request for the use of data, which will be  
33 evaluated by all Group.

34  
35 **Transparency declaration.** The lead author (the manuscript's guarantor) affirms that the  
36 manuscript is an honest, accurate, and transparent account of the study being reported; that  
37 no important aspects of the study have been omitted; and that any discrepancies from the  
38 study as planned (and, if relevant, registered) have been explained.

### 39 **Ethics approval**

40  
41 As the present investigation involves data collected as a part of prior studies, no specific  
42 study protocol approval was needed, as all Institutional and Ethics Committees of each  
43 participating institution (Argentina:1619/2010 and 0127/2011; Ecuador: 2016-129IN, and  
44 Mexico: DI/11/4044B/3/123) had already approved pertinent studies and authorities from  
45 participating indigenous communities [18].

## References

- 1 Bilsborrow JB, Peláez-Ballestas I, Pons-Estel B, *et al.* Global Rheumatology Research: Frontiers, Challenges, and Opportunities. *Arthritis Rheumatol Hoboken NJ* 2022;**74**:1–4. doi:10.1002/art.41980
- 2 Cardiel MH. Present and future of rheumatic diseases in Latin America. Are we prepared to face them? *Reumatol Clin* 2011;**7**:279–80. doi:10.1016/j.reuma.2010.12.009
- 3 Brooks PM. The burden of musculoskeletal disease--a global perspective. *Clin Rheumatol* 2006;**25**:778–81. doi:10.1007/s10067-006-0240-3
- 4 Briggs A, Slater H, Jordan J, *et al.* Towards a global strategy to improve musculoskeletal health. Sydney, Australia: : Global Alliance for Musculoskeletal Health 2021.
- 5 Commission on Social Determinants of Health. Subsanan las desigualdades en una generación : alcanzar la equidad sanitaria actuando sobre los determinantes sociales de la salud : informe final de la Comisión Sobre Determinantes Sociales de la Salud. Organización Mundial de la Salud 2009. <https://apps.who.int/iris/handle/10665/44084> (accessed 3 Apr 2022).
- 6 OECD. *Health at a Glance 2021: OECD Indicators*. Paris: : Organisation for Economic Co-operation and Development 2021. <https://doi.org/10.1787/ae3016b9-en> (accessed 3 Apr 2022).
- 7 Linares-Pérez N, Arellano OL. La equidad en salud: propuestas conceptuales, aspectos críticos y perspectivas desde el campo de la Salud Colectiva. *Med Soc* 2008;**3**:247–59.
- 8 Intriago M, Maldonado G, Guerrero R, *et al.* LARS study: Latin American rheumatologist survey. *Clin Rheumatol* 2021;**40**:377–87. doi:10.1007/s10067-020-05240-y
- 9 Peláez-Ballestas I, Alvarez-Nemegyei J, Loyola-Sánchez A, *et al.* Prevalence and factors associated with musculoskeletal disorders and rheumatic diseases in indigenous Maya-Yucateco people: a cross-sectional community-based study. *Clin Rheumatol* 2016;**35 Suppl 1**:15–23. doi:10.1007/s10067-015-3085-9
- 10 Quintana R, Goñi M, Mathern N, *et al.* Rheumatoid arthritis in the indigenous qom population of Rosario, Argentina: aggressive and disabling disease with inadequate adherence to treatment in a community-based cohort study. *Clin Rheumatol* 2018;**37**:2323–30. doi:10.1007/s10067-018-4103-5



- 11 Ugarte-Gil MF, Silvestre AMR, Pons-Estel BA. Access to an optimal treatment. Current situation. *Clin Rheumatol* 2015;**34 Suppl 1**:S59-66. doi:10.1007/s10067-015-3018-7
- 12 Colmenares-Roa T, Figueroa-Perea JG, Pelcastre-Villafuerte B, *et al.* Vulnerability as a palimpsest: Practices and public policy in a Mexican hospital setting. *Health Lond Engl* 1997 2021;:1363459320988879. doi:10.1177/1363459320988879
- 13 Peláez-Ballestas I, Pons-Estel BA, Burgos-Vargas R. Epidemiology of rheumatic diseases in indigenous populations in Latin-Americans. *Clin Rheumatol* 2016;**35 Suppl 1**:1-3. doi:10.1007/s10067-016-3298-6
- 14 Singer M, Bulled N, Ostrach B, *et al.* Syndemics and the biosocial conception of health. *Lancet Lond Engl* 2017;**389**:941-50. doi:10.1016/S0140-6736(17)30003-X
- 15 Mendenhall E, Kohrt BA, Norris SA, *et al.* Non-communicable disease syndemics: poverty, depression, and diabetes among low-income populations. *Lancet Lond Engl* 2017;**389**:951-63. doi:10.1016/S0140-6736(17)30402-6
- 16 Willen SS, Knipper M, Abadía-Barrero CE, *et al.* Syndemic vulnerability and the right to health. *Lancet Lond Engl* 2017;**389**:964-77. doi:10.1016/S0140-6736(17)30261-1
- 17 Peláez-Ballestas I, Granados Y, Quintana R, *et al.* Epidemiology and socioeconomic impact of the rheumatic diseases on indigenous people: an invisible syndemic public health problem. *Ann Rheum Dis* 2018;**77**:1397-404. doi:10.1136/annrheumdis-2018-213625
- 18 Strozzi AG, Peláez-Ballestas I, Granados Y, *et al.* Syndemic and syndemogenesis of low back pain in Latin-American population: a network and cluster analysis. *Clin Rheumatol* 2020;**39**:2715-26. doi:10.1007/s10067-020-05047-x
- 19 Juárez V, Quintana R, Crespo ME, *et al.* Prevalence of musculoskeletal disorders and rheumatic diseases in an Argentinean indigenous Wichi community. *Clin Rheumatol* 2021;**40**:75-83. doi:10.1007/s10067-020-05130-3
- 20 Guevara SV, Feicán EA, Peláez I, *et al.* Prevalence of Rheumatic Diseases and Quality of Life in the Saraguro Indigenous People, Ecuador: A Cross-sectional Community-Based Study. *J Clin Rheumatol Pract Rep Rheum Musculoskelet Dis* 2020;**26**:S139-47. doi:10.1097/RHU.0000000000001131
- 21 Loyola-Sanchez A, Richardson J, Peláez-Ballestas I, *et al.* The impact of arthritis on the physical function of a rural Maya-Yucateco community and factors associated with its prevalence: a cross sectional, community-based study. *Clin Rheumatol* 2016;**35 Suppl 1**:25-34. doi:10.1007/s10067-015-3084-x
- 22 Granados Y, Rosillo C, Cedeño L, *et al.* Prevalence of musculoskeletal disorders and rheumatic disease in the Warao, Kari'ña, and Chaima indigenous populations of

- 1  
2  
3  
4  
5  
6  
7  
8  
9 Monagas State, Venezuela. *Clin Rheumatol* 2016;**35 Suppl 1**:53–61.  
10 doi:10.1007/s10067-016-3194-0
- 11  
12 23 Ballestas IP, Santos AM, Angarita I, *et al*. Adecuación y validación transcultural del  
13 cuestionario COPCORD: Programa Orientado a la Comunidad para el Control de las  
14 Enfermedades Reumáticas en Colombia. *Rev Colomb Reumatol* 2019;**26**:88–96.  
15 doi:10.1016/j.rcreu.2019.01.004
- 16  
17 24 Guevara-Pacheco S, Feicán-Alvarado A, Sanín LH, *et al*. Prevalence of musculoskeletal  
18 disorders and rheumatic diseases in Cuenca, Ecuador: a WHO-ILAR COPCORD study.  
19 *Rheumatol Int* 2016;**36**:1195–204. doi:10.1007/s00296-016-3446-y
- 20  
21 25 Alvarez-Nemegyei J, Peláez-Ballestas I, Rodríguez-Amado J, *et al*. Prevalence of  
22 rheumatic regional pain syndromes in adults from Mexico: a community survey using  
23 COPCORD for screening and syndrome-specific diagnostic criteria. *J Rheumatol Suppl*  
24 2011;**86**:15–20. doi:10.3899/jrheum.100953
- 25  
26 26 Granados Y, Cedeño L, Rosillo C, *et al*. Prevalence of musculoskeletal disorders and  
27 rheumatic diseases in an urban community in Monagas State, Venezuela: a COPCORD  
28 study. *Clin Rheumatol* 2015;**34**:871–7. doi:10.1007/s10067-014-2689-9
- 29  
30 27 Londoño J, Peláez Ballestas I, Cuervo F, *et al*. Prevalencia de la enfermedad reumática  
31 en Colombia, según estrategia COPCORD-Asociación Colombiana de Reumatología.  
32 Estudio de prevalencia de enfermedad reumática en población colombiana mayor de  
33 18 años. *Rev Colomb Reumatol* 2018;**25**:245–56. doi:10.1016/j.rcreu.2018.08.003
- 34  
35 28 Darmawan J. Recommendations from the Community Oriented Program for Control  
36 of Rheumatic Disease for data collection for the measurement and monitoring of  
37 health in developing countries. *Clin Rheumatol* 2007;**26**:853–7. doi:10.1007/s10067-  
38 007-0553-x
- 39  
40 29 Muirden KD. Community Oriented Program for the Control of Rheumatic Diseases:  
41 studies of rheumatic diseases in the developing world. *Curr Opin Rheumatol*  
42 2005;**17**:153–6. doi:10.1097/01.bor.0000151402.11028.53
- 43  
44 30 Bruce B, Fries JF. The Health Assessment Questionnaire (HAQ). *Clin Exp Rheumatol*  
45 2005;**23**:S14-18.
- 46  
47 31 Seabold S, Perktold J. Statsmodels: Econometric and Statistical Modeling with  
48 Python. In: *Proceedings of the 9th Python in Science Conference*. 2010. 92–6.  
49 doi:10.25080/Majora-92bf1922-011
- 50  
51 32 McFadden D. Quantitative Methods for Analyzing Travel Behaviour of Individuals:  
52 Some Recent Developments. Cowles Foundation for Research in Economics, Yale  
53 University 1977. <https://econpapers.repec.org/paper/cwlcwldpp/474.htm> (accessed  
54 9 Nov 2022).

- 1  
2  
3  
4  
5  
6  
7  
8  
9 33 McFadden D. Conditional logit analysis of qualitative choice behavior. *Front Econom*  
10 1974.
- 11  
12 34 Chiesi AM. Network Analysis. In: Smelser NJ, Baltes PB, eds. *International*  
13 *Encyclopedia of the Social & Behavioral Sciences*. Oxford, UK: : Pergamon 2001.  
14 10499–502. doi:10.1016/B0-08-043076-7/04211-X
- 15  
16 35 Singhal A. Modern Information Retrieval: A Brief Overview. *IEEE Data Eng Bull*  
17 2001;**24**:35–43.
- 18  
19 36 Han J, Kamber M, Pei J. 2 - Getting to Know Your Data. In: Han J, Kamber M, Pei J,  
20 eds. *Data Mining (Third Edition)*. Boston: : Morgan Kaufmann 2012. 39–82.  
21 doi:10.1016/B978-0-12-381479-1.00002-2
- 22  
23 37 Bastian M, Heymann S, Jacomy M. Gephi: An Open Source Software for Exploring and  
24 Manipulating Networks. ICWSM 2009.
- 25  
26 38 Ester M, Kriegel H-P, Sander J, *et al.* A density-based algorithm for discovering  
27 clusters in large spatial databases with noise. In: *Proceedings of the Second*  
28 *International Conference on Knowledge Discovery and Data Mining*. Portland,  
29 Oregon: : AAAI Press 1996. 226–31.
- 30  
31 39 Nerurkar L, Siebert S, McInnes IB, *et al.* Rheumatoid arthritis and depression: an  
32 inflammatory perspective. *Lancet Psychiatry* 2019;**6**:164–73. doi:10.1016/S2215-  
33 0366(18)30255-4
- 34  
35 40 Pelaez-Ballestas I, Granados Y, Quintana R, *et al.* Epidemiology and socioeconomic  
36 impact of the rheumatic diseases on indigenous people: an invisible syndemic public  
37 health problem. *Ann Rheum Dis* 2018;**77**:1397–404. doi:10.1136/annrheumdis-2018-  
38 213625
- 39  
40 41 Quintana R, Fernández S, Orzuza SM, *et al.* «Living with rheumatoid arthritis» in an  
41 indigenous qom population in Argentina. A qualitative study. *Reumatol Clin*  
42 2021;**17**:543–8. doi:10.1016/j.reumae.2020.04.006
- 43  
44 42 Massardo L, Pons-Estel BA, Wojdyla D, *et al.* Early rheumatoid arthritis in Latin  
45 America: low socioeconomic status related to high disease activity at baseline.  
46 *Arthritis Care Res* 2012;**64**:1135–43. doi:10.1002/acr.21680
- 47  
48 43 Yip K, Navarro-Millán I. Racial, ethnic, and healthcare disparities in rheumatoid  
49 arthritis. *Curr Opin Rheumatol* 2021;**33**:117–21.  
50 doi:10.1097/BOR.0000000000000782
- 51  
52 44 A Mixed-Methods Systematic Review on Syndemics in Rheumatolo... : JCR: Journal of  
53 Clinical Rheumatology.

1  
2  
3  
4  
5  
6  
7  
8  
9 [https://journals.lww.com/jclinrheum/Abstract/9900/A\\_Mixed\\_Methods\\_Systematic\\_Review\\_on\\_Syndemics\\_in.63.aspx](https://journals.lww.com/jclinrheum/Abstract/9900/A_Mixed_Methods_Systematic_Review_on_Syndemics_in.63.aspx) (accessed 9 Nov 2022).

- 10  
11  
12 45 Norton S, Koduri G, Nikiphorou E, *et al*. A study of baseline prevalence and  
13 cumulative incidence of comorbidity and extra-articular manifestations in RA and  
14 their impact on outcome. *Rheumatol Oxf Engl* 2013;**52**:99–110.  
15 doi:10.1093/rheumatology/kes262
- 16 46 Radner H, Yoshida K, Frits M, *et al*. The impact of multimorbidity status on treatment  
17 response in rheumatoid arthritis patients initiating disease-modifying anti-rheumatic  
18 drugs. *Rheumatol Oxf Engl* 2015;**54**:2076–84. doi:10.1093/rheumatology/kev239
- 19  
20 47 Ford ME, Kelly PA. Conceptualizing and categorizing race and ethnicity in health  
21 services research. *Health Serv Res* 2005;**40**:1658–75. doi:10.1111/j.1475-  
22 6773.2005.00449.x
- 23  
24 48 Gibson O, Lisy K, Davy C, *et al*. Enablers and barriers to the implementation of  
25 primary health care interventions for Indigenous people with chronic diseases: a  
26 systematic review. *Implement Sci IS* 2015;**10**:71. doi:10.1186/s13012-015-0261-x

### 27 **Figure Legend**

28  
29 Figure 1. Network and cluster analysis to describe groups with shared variables according to the  
30 syndemic framework in the indigenous population. (Title)

31  
32  
33 Figure 2. Network and cluster analysis to describe groups with shared variables according to the  
34 syndemic framework in the non-indigenous population. (Title).

35  
36  
37 Figure 3. Inequities and vulnerabilities in RMDs: a palimpsest model (Title)

38  
39 A model of vulnerability in layers analyzes how the determinants of health at different levels  
40 -genetic, biological, psychological, social and political- interact over time, creating barriers  
41 that lead to health inequity. (Figure caption)

Figure 1. Network and cluster analysis to describe groups with shared variables according to the syndemic framework in the indigenous population

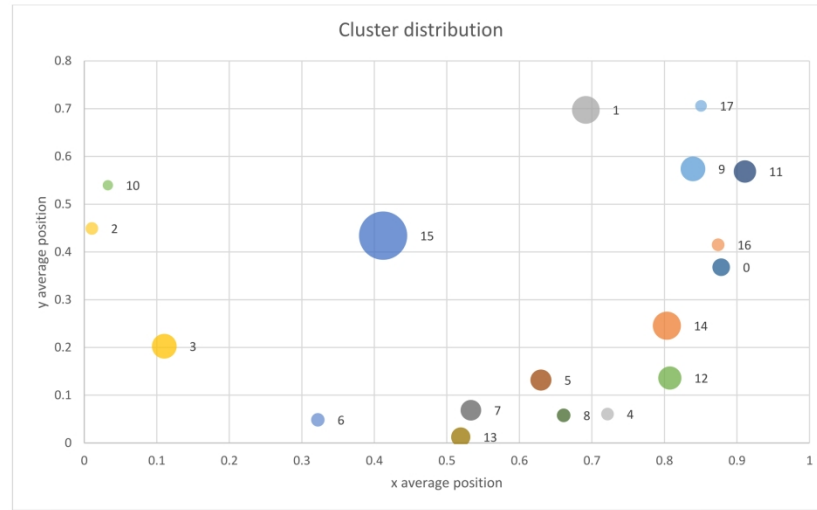

| Cluster                      | 1             | 11            | 13            | 14            | 15            | 16            |
|------------------------------|---------------|---------------|---------------|---------------|---------------|---------------|
| Total                        | 1062          | 694           | 514           | 1097          | 3234          | 224           |
| Health coverage              | Partial       | Full          | Partial       | Full          | Partial       | Private       |
| Joint biomechanical stress   | Unspecified   | High          | Medium        | High          | High          | High          |
| Gender                       | 60.36         | 63.83         | 57.39         | 64.18         | 65.31         | 57.14         |
| Age*                         | 37.32 (15.00) | 41.10 (21.68) | 39.26 (15.52) | 45.58 (18.60) | 44.68 (17.61) | 50.40 (17.39) |
| Formal schooling*            | 5.10 (3.56)   | 9.32 (5.52)   | 4.83 (4.39)   | 6.11 (4.55)   | 4.92 (3.74)   | 5.88 (4.63)   |
| Argentina                    | 82.86         | 0.00          | 28.40         | 0.00          | 11.87         | 8.04          |
| Colombia                     | 0.00          | 0.00          | 0.00          | 0.00          | 0.00          | 0.00          |
| Ecuador                      | 0.00          | 84.15         | 3.11          | 93.16         | 5.04          | 75.45         |
| Mexico                       | 7.72          | 15.85         | 19.07         | 6.84          | 60.36         | 16.52         |
| Venezuela                    | 9.42          | 0.00          | 49.42         | 0.00          | 22.73         | 0.00          |
| Rheumatic disease (any)      | 31.83         | 32.28         | 29.57         | 41.66         | 40.45         | 47.32         |
| Osteoarthritis               | 6.21          | 14.12         | 7.39          | 18.87         | 12.83         | 23.21         |
| Rheumatoid arthritis         | 3.01          | 3.17          | 2.72          | 1.73          | 2.94          | 2.68          |
| Backpain                     | 19.02         | 10.66         | 14.98         | 18.60         | 15.34         | 15.18         |
| RRPS                         | 1.98          | 4.18          | 2.53          | 7.29          | 2.29          | 5.36          |
| Musculoskeletal disorders    | 2.17          | 4.90          | 2.72          | 3.65          | 8.94          | 5.36          |
| Fibromyalgia                 | 0.09          | 3.46          | 0.58          | 4.92          | 1.67          | 5.80          |
| Others                       | 0.09          | 0.29          | 0.78          | 0.18          | 0.43          | 0.45          |
| Historical pain              | 44.82         | 40.63         | 36.19         | 49.95         | 52.26         | 54.91         |
| Non-traumatic pain (7 days)  | 20.72         | 7.49          | 17.52         | 10.12         | 27.40         | 13.84         |
| Physical disability (HAQ-DI) | 3.48          | 12.82         | 4.28          | 11.39         | 3.96          | 7.14          |
| Diabetes mellitus            | 5.18          | 5.04          | 3.89          | 5.10          | 6.77          | 7.14          |
| High blood pressure          | 15.35         | 10.23         | 7.78          | 12.94         | 13.42         | 17.41         |
| Cardiovascular disease       | 5.74          | 1.30          | 2.72          | 3.01          | 3.34          | 4.02          |
| Smoking                      | 18.74         | 3.46          | 16.15         | 4.19          | 9.86          | 7.14          |
| Alcoholism                   | 14.69         | 10.95         | 19.84         | 14.77         | 23.13         | 23.66         |
| Anxiety/depression           | 4.14          | 39.77         | 4.09          | 49.59         | 22.70         | 43.75         |
| No comorbidities             | 42.09         | 34.44         | 53.89         | 27.53         | 35.44         | 23.21         |

RRPS: Rheumatic regional pain syndromes. Health Assessment Questionnaire-Disability Index (HAQ-DI) cut-off point of greater than 0.8.

\* Age and formal schooling show mean value (standard deviation)

Figure 1. Network and cluster analysis to describe groups with shared variables according to the syndemic framework in the indigenous population

215x279mm (300 x 300 DPI)

Figure 2. Network and cluster analysis to describe groups with shared variables according to the syndemic framework in the non-indigenous population

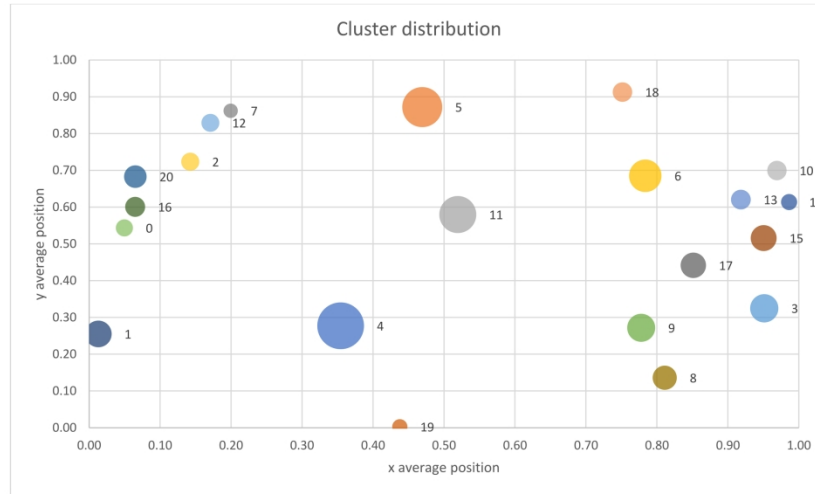

| Cluster                      | 4             | 7             | 8                | 9             | 10               | 17            |
|------------------------------|---------------|---------------|------------------|---------------|------------------|---------------|
| Total                        | 4586          | 429           | 1223             | 1647          | 789              | 1353          |
| Health coverage              | Partial       | Public Full   | Partial coverage | Full coverage | Partial coverage | Private       |
| Joint biomechanical stress   | Unspecified   | High          | Medium           | High          | High             | High          |
| Gender                       | 78.28         | 59.67         | 78.00            | 50.27         | 61.22            | 87.66         |
| Age*                         | 46.99 (17.78) | 40.82 (16.70) | 44.45 (17.07)    | 44.11 (18.83) | 41.36 (17.53)    | 47.33 (17.15) |
| Formal schooling*            | 7.78 (4.08)   | 7.85 (4.29)   | 7.92 (4.53)      | 11.38 (5.14)  | 8.69 (4.65)      | 7.50 (5.09)   |
| Argentina                    | 0.00          | 0.00          | 0.00             | 0.00          | 0.00             | 0.00          |
| Colombia                     | 50.81         | 0.00          | 4.17             | 34.30         | 0.13             | 0.00          |
| Ecuador                      | 0.00          | 0.70          | 36.96            | 42.74         | 0.00             | 0.00          |
| Mexico                       | 39.77         | 99.30         | 58.87            | 22.95         | 99.62            | 100.00        |
| Venezuela                    | 9.42          | 0.00          | 0.00             | 0.00          | 0.25             | 0.00          |
| Rheumatic disease (any)      | 40.49         | 29.84         | 42.44            | 41.89         | 20.41            | 13.90         |
| Osteoarthritis               | 11.32         | 9.09          | 7.44             | 5.59          | 7.48             | 4.95          |
| Rheumatoid arthritis         | 2.46          | 2.80          | 1.88             | 1.82          | 3.55             | 4.07          |
| Backpain                     | 6.56          | 9.09          | 4.74             | 3.10          | 4.94             | 1.85          |
| RRPS                         | 23.92         | 2.80          | 26.17            | 34.00         | 1.14             | 0.89          |
| Musculoskeletal disorders    | 4.49          | 5.36          | 2.04             | 2.43          | 2.92             | 2.00          |
| Fibromyalgia                 | 0.41          | 1.17          | 1.88             | 0.67          | 0.76             | 0.07          |
| Others                       | 0.37          | 0.23          | 0.25             | 0.79          | 0.13             | 0.30          |
| Historical pain              | 57.78         | 20.51         | 35.32            | 47.54         | 23.32            | 17.44         |
| Non-traumatic pain (7 days)  | 38.60         | 28.67         | 33.69            | 27.26         | 23.19            | 15.08         |
| Physical disability (HAQ-DI) | 7.76          | 15.15         | 14.23            | 6.44          | 13.05            | 12.34         |
| Diabetes mellitus            | 8.26          | 7.93          | 8.91             | 6.86          | 9.38             | 10.20         |
| High blood pressure          | 22.68         | 13.75         | 19.46            | 18.40         | 17.87            | 20.40         |
| Cardiovascular disease       | 4.93          | 3.26          | 3.92             | 4.80          | 3.68             | 2.14          |
| Smoking                      | 17.84         | 10.26         | 16.11            | 32.54         | 7.48             | 0.81          |
| Alcoholism                   | 4.91          | 6.76          | 3.19             | 2.37          | 4.31             | 0.59          |
| Anxiety/depression           | 3.92          | 7.46          | 12.43            | 6.07          | 9.76             | 8.50          |
| No comorbidities             | 38.03         | 43.36         | 34.10            | 38.13         | 46.01            | 58.39         |

RRPS: Rheumatic regional pain syndromes. Health Assessment Questionnaire-Disability Index (HAQ-DI) cut-off point of greater than 0.8.

\* Age and formal schooling show mean value (standard deviation)

Figure 2. Network and cluster analysis to describe groups with shared variables according to the syndemic framework in the non-indigenous population

215x279mm (300 x 300 DPI)

1  
2  
3  
4  
5  
6  
7  
8  
9  
10  
11  
12  
13  
14  
15  
16  
17  
18  
19  
20  
21  
22  
23  
24  
25  
26  
27  
28  
29  
30  
31  
32  
33  
34  
35  
36  
37  
38  
39  
40  
41  
42  
43  
44  
45  
46  
47  
48  
49  
50  
51  
52  
53  
54  
55  
56  
57  
58  
59  
60

Figure 3. Inequities and vulnerabilities in RMDs: a palimpsest model

| Layer of Inequity | Vulnerabilities               | Examples                                       |
|-------------------|-------------------------------|------------------------------------------------|
| Layer 5           | Political vulnerabilities     | Healthcare system                              |
| Layer 4           | Social vulnerabilities        | Lifestyle and Ethnic minorities                |
| Layer 3           | Psychological vulnerabilities | Mental illness                                 |
| Layer 2           | Biological vulnerabilities    | Individual patient and disease characteristics |
| Layer 1           | Genetic vulnerability         | Genetic predispositions                        |

A model of vulnerability in layers analyzes how the determinants of health at different levels—genetic, biological, psychological, social and political—interact over time, creating barriers that lead to health inequity.

Figure 3. Inequities and vulnerabilities in RMDs: a palimpsest model

452x290mm (236 x 236 DPI)

**Supplementary Table.** Comparison of sociodemographic characteristics, health coverage, rheumatic diagnosis, pain, disability and comorbidities between indigenous and non-indigenous groups from Ecuador, Mexico and Argentina

|                                                                                | Indigenous<br>n (%)<br>4599 (50.00) | Non-<br>indigenous<br>n (%)<br>4599 (50.00) | Totals<br>n (%)<br>9198 (100.00) | p      |
|--------------------------------------------------------------------------------|-------------------------------------|---------------------------------------------|----------------------------------|--------|
| Gender (female)                                                                | 2788 (60.62)                        | 2729 (59.34)                                | 5517 (59.98)                     | 0.217  |
| Age (years), mean (SD)                                                         | 42.90 (18.71)                       | 42.98 (17.58)                               | 42.94 (18.16)                    | 0.163  |
| Urban setting                                                                  | 832 (18.09)                         | 3624 (78.80)                                | 4456 (48.45)                     | <0.001 |
| Educational level, mean number of years (SD)                                   | 6.74 (5.17)                         | 9.17 (5.15)                                 | 7.95 (5.30)                      | <0.001 |
| Health coverage *                                                              |                                     |                                             |                                  |        |
| Full                                                                           | 1351 (29.38)                        | 551 (11.98)                                 | 1902 (20.68)                     | <0.001 |
| Partial                                                                        | 2536 (55.14)                        | 2401 (52.21)                                | 4937 (53.67)                     | <0.01  |
| Private                                                                        | 245 (5.33)                          | 501 (10.89)                                 | 746 (8.11)                       | <0.001 |
| Other**                                                                        | 171 (3.72)                          | 34 (0.74)                                   | 205 (2.23)                       | <0.001 |
| Joint biomechanical stress ***                                                 |                                     |                                             |                                  |        |
| High                                                                           | 2162 (47.01)                        | 1176 (25.57)                                | 3338 (36.29)                     | <0.001 |
| Medium                                                                         | 534 (11.61)                         | 503 (10.94)                                 | 1037 (11.27)                     | 0.323  |
| Low                                                                            | 1472 (32.01)                        | 1574 (34.22)                                | 3046 (33.12)                     | 0.025  |
| Unspecified                                                                    | 254 (5.52)                          | 267 (5.81)                                  | 521 (5.66)                       | 0.588  |
| Rheumatic disease                                                              |                                     |                                             |                                  |        |
| Totals                                                                         | 1428 (31.05)                        | 1521 (33.07)                                | 2949 (32.06)                     | 0.040  |
| Osteoarthritis                                                                 | 616 (13.39)                         | 334 (7.26)                                  | 950 (10.33)                      | <0.001 |
| Rheumatoid arthritis                                                           | 104 (2.26)                          | 80 (1.74)                                   | 184 (2.00)                       | 0.087  |
| Back pain                                                                      | 521 (11.33)                         | 138 (3.00)                                  | 659 (7.16)                       | <0.001 |
| RRPS                                                                           | 142 (3.09)                          | 895 (19.46)                                 | 1037 (11.27)                     | <0.001 |
| Musculoskeletal disorders                                                      | 170 (3.70)                          | 83 (1.80)                                   | 253 (2.75)                       | <0.001 |
| Fibromyalgia                                                                   | 89 (1.94)                           | 50 (1.09)                                   | 139 (1.51)                       | <0.01  |
| Other ****                                                                     | 26 (0.57)                           | 21 (0.46)                                   | 47 (0.51)                        | 0.559  |
| Pain                                                                           |                                     |                                             |                                  |        |
| Historical pain                                                                | 1839 (39.99)                        | 1487 (32.33)                                | 3326 (36.16)                     | <0.001 |
| Non-traumatic pain (7 days)                                                    | 819 (17.81)                         | 1012 (22.00)                                | 1831 (19.91)                     | <0.001 |
| Physical disability (Health Assessment Questionnaire-Disability Index (HAQ-DI) |                                     |                                             |                                  |        |
| HAQ $\geq$ 0.8                                                                 | 308 (6.70)                          | 375 (8.15)                                  | 683 (7.43)                       | <0.01  |
| Comorbidities                                                                  |                                     |                                             |                                  |        |
| Diabetes mellitus                                                              | 236 (5.13)                          | 326 (7.09)                                  | 562 (6.11)                       | <0.001 |
| High blood pressure                                                            | 528 (11.48)                         | 855 (18.59)                                 | 1383 (15.04)                     | <0.001 |
| Cardiovascular disease                                                         | 142 (3.09)                          | 150 (3.26)                                  | 292 (3.17)                       | 0.677  |
| Smoking                                                                        | 332 (7.22)                          | 697 (15.16)                                 | 1029 (11.19)                     | <0.001 |
| Alcoholism                                                                     | 643 (13.98)                         | 198 (4.31)                                  | 841 (9.14)                       | <0.001 |
| Anxiety/depression                                                             | 913 (19.85)                         | 501 (10.89)                                 | 1414 (15.37)                     | <0.001 |
| No comorbidities                                                               | 2261 (49.16)                        | 1991 (43.29)                                | 4252 (46.23)                     | <0.001 |

\* Missing data: 296 (6.44%) indigenous and 1112 (24.18%) non-indigenous (total 1408 (15.31%))

\*\* Other: Traditional healthcare

\*\*\* Missing data: 177 (3.85%) indigenous and 1079 (23.46%) non-indigenous (total 1256 (13.65%))

\*\*\*\* Others: *Indigenous*: 18 ankylosing spondylitis, 4 gout, 1 scleroderma and 2 psoriasis. *Non-indigenous*: 2 ankylosing spondylitis, 14 gout, and 1 psoriasis.



## STROBE Statement—checklist of items that should be included in reports of observational studies

|                              | Item No | Recommendation                                                                                                                                                                                                                                                                                                                                                                                                                                                         | Page No  |
|------------------------------|---------|------------------------------------------------------------------------------------------------------------------------------------------------------------------------------------------------------------------------------------------------------------------------------------------------------------------------------------------------------------------------------------------------------------------------------------------------------------------------|----------|
| <b>Title and abstract</b>    | 1       | (a) Indicate the study's design with a commonly used term in the title or the abstract                                                                                                                                                                                                                                                                                                                                                                                 | 6        |
|                              |         | (b) Provide in the abstract an informative and balanced summary of what was done and what was found                                                                                                                                                                                                                                                                                                                                                                    | 6,7      |
| <b>Introduction</b>          |         |                                                                                                                                                                                                                                                                                                                                                                                                                                                                        |          |
| Background/rationale         | 2       | Explain the scientific background and rationale for the investigation being reported                                                                                                                                                                                                                                                                                                                                                                                   | 8,10     |
| Objectives                   | 3       | State specific objectives, including any prespecified hypotheses                                                                                                                                                                                                                                                                                                                                                                                                       | 10       |
| <b>Methods</b>               |         |                                                                                                                                                                                                                                                                                                                                                                                                                                                                        |          |
| Study design                 | 4       | Present key elements of study design early in the paper                                                                                                                                                                                                                                                                                                                                                                                                                | 10       |
| Setting                      | 5       | Describe the setting, locations, and relevant dates, including periods of recruitment, exposure, follow-up, and data collection                                                                                                                                                                                                                                                                                                                                        | 10,11    |
| Participants                 | 6       | (a) <i>Cohort study</i> —Give the eligibility criteria, and the sources and methods of selection of participants. Describe methods of follow-up<br><i>Case-control study</i> —Give the eligibility criteria, and the sources and methods of case ascertainment and control selection. Give the rationale for the choice of cases and controls<br><i>Cross-sectional study</i> —Give the eligibility criteria, and the sources and methods of selection of participants | 11       |
|                              |         | (b) <i>Cohort study</i> —For matched studies, give matching criteria and number of exposed and unexposed<br><i>Case-control study</i> —For matched studies, give matching criteria and the number of controls per case                                                                                                                                                                                                                                                 |          |
| Variables                    | 7       | Clearly define all outcomes, exposures, predictors, potential confounders, and effect modifiers. Give diagnostic criteria, if applicable                                                                                                                                                                                                                                                                                                                               | 11,12    |
| Data sources/<br>measurement | 8*      | For each variable of interest, give sources of data and details of methods of assessment (measurement). Describe comparability of assessment methods if there is more than one group                                                                                                                                                                                                                                                                                   | 12       |
| Bias                         | 9       | Describe any efforts to address potential sources of bias                                                                                                                                                                                                                                                                                                                                                                                                              | 14       |
| Study size                   | 10      | Explain how the study size was arrived at                                                                                                                                                                                                                                                                                                                                                                                                                              | 13       |
| Quantitative variables       | 11      | Explain how quantitative variables were handled in the analyses. If applicable, describe which groupings were chosen and why                                                                                                                                                                                                                                                                                                                                           | 12       |
| Statistical methods          | 12      | (a) Describe all statistical methods, including those used to control for confounding                                                                                                                                                                                                                                                                                                                                                                                  | 12,13,14 |
|                              |         | (b) Describe any methods used to examine subgroups and interactions                                                                                                                                                                                                                                                                                                                                                                                                    | 13       |
|                              |         | (c) Explain how missing data were addressed                                                                                                                                                                                                                                                                                                                                                                                                                            | N/A      |
|                              |         | (d) <i>Cohort study</i> —If applicable, explain how loss to follow-up was addressed<br><i>Case-control study</i> —If applicable, explain how matching of cases and controls was addressed<br><i>Cross-sectional study</i> —If applicable, describe analytical methods taking account of sampling strategy                                                                                                                                                              |          |
|                              |         | (e) Describe any sensitivity analyses                                                                                                                                                                                                                                                                                                                                                                                                                                  | 13       |

1  
2  
3  
4  
5  
6  
7  
8  
9  
10  
11  
12  
13  
14  
15  
16  
17  
18  
19  
20  
21  
22  
23  
24  
25  
26  
27  
28  
29  
30  
31  
32  
33  
34  
35  
36  
37  
38  
39  
40  
41  
42  
43  
44  
45  
46  
47  
48  
49  
50  
51  
52  
53  
54  
55  
56  
57  
58  
59  
60

Continued on next page

For peer review only

1  
2  
3  
4  
5  
6  
7  
8  
9  
10  
11  
12  
13  
14  
15  
16  
17  
18  
19  
20  
21  
22  
23  
24  
25  
26  
27  
28  
29  
30  
31  
32  
33  
34  
35  
36  
37  
38  
39  
40  
41  
42  
43  
44  
45  
46  
47  
48  
49  
50  
51  
52  
53  
54  
55  
56  
57  
58  
59  
60**Results**

|                  |     |                                                                                                                                                                                                              |          |       |
|------------------|-----|--------------------------------------------------------------------------------------------------------------------------------------------------------------------------------------------------------------|----------|-------|
| Participants     | 13* | (a) Report numbers of individuals at each stage of study—eg numbers potentially eligible, examined for eligibility, confirmed eligible, included in the study, completing follow-up, and analysed            | 14       |       |
|                  |     | (b) Give reasons for non-participation at each stage                                                                                                                                                         |          |       |
|                  |     | (c) Consider use of a flow diagram                                                                                                                                                                           |          |       |
| Descriptive data | 14* | (a) Give characteristics of study participants (eg demographic, clinical, social) and information on exposures and potential confounders                                                                     | 14       |       |
|                  |     | (b) Indicate number of participants with missing data for each variable of interest                                                                                                                          |          | 17    |
|                  |     | (c) <i>Cohort study</i> —Summarise follow-up time (eg, average and total amount)                                                                                                                             |          |       |
| Outcome data     | 15* | <i>Cohort study</i> —Report numbers of outcome events or summary measures over time                                                                                                                          |          |       |
|                  |     | <i>Case-control study</i> —Report numbers in each exposure category, or summary measures of exposure                                                                                                         |          |       |
|                  |     | <i>Cross-sectional study</i> —Report numbers of outcome events or summary measures                                                                                                                           |          | 15-16 |
| Main results     | 16  | (a) Give unadjusted estimates and, if applicable, confounder-adjusted estimates and their precision (eg, 95% confidence interval). Make clear which confounders were adjusted for and why they were included | 17,18,19 |       |
|                  |     | (b) Report category boundaries when continuous variables were categorized                                                                                                                                    |          |       |
|                  |     | (c) If relevant, consider translating estimates of relative risk into absolute risk for a meaningful time period                                                                                             |          | 19    |
| Other analyses   | 17  | Report other analyses done—eg analyses of subgroups and interactions, and sensitivity analyses                                                                                                               | 20,21    |       |

**Discussion**

|                  |    |                                                                                                                                                                            |          |
|------------------|----|----------------------------------------------------------------------------------------------------------------------------------------------------------------------------|----------|
| Key results      | 18 | Summarise key results with reference to study objectives                                                                                                                   | 21,22,23 |
| Limitations      | 19 | Discuss limitations of the study, taking into account sources of potential bias or imprecision. Discuss both direction and magnitude of any potential bias                 | 23       |
| Interpretation   | 20 | Give a cautious overall interpretation of results considering objectives, limitations, multiplicity of analyses, results from similar studies, and other relevant evidence | 23       |
| Generalisability | 21 | Discuss the generalisability (external validity) of the study results                                                                                                      | 24       |

**Other information**

|         |    |                                                                                                                                                               |    |
|---------|----|---------------------------------------------------------------------------------------------------------------------------------------------------------------|----|
| Funding | 22 | Give the source of funding and the role of the funders for the present study and, if applicable, for the original study on which the present article is based | 25 |
|---------|----|---------------------------------------------------------------------------------------------------------------------------------------------------------------|----|

\*Give information separately for cases and controls in case-control studies and, if applicable, for exposed and unexposed groups in cohort and cross-sectional studies.

**Note:** An Explanation and Elaboration article discusses each checklist item and gives methodological background and published examples of transparent reporting. The STROBE checklist is best used in conjunction with this article (freely available on the Web sites of PLoS Medicine at <http://www.plosmedicine.org/>, Annals of Internal Medicine at <http://www.annals.org/>, and Epidemiology at <http://www.epidem.com/>). Information on the STROBE Initiative is available at [www.strobe-statement.org](http://www.strobe-statement.org).

# BMJ Open

## INEQUITY AND VULNERABILITY IN LATIN AMERICAN INDIGENOUS AND NON-INDIGENOUS POPULATIONS WITH RHEUMATIC DISEASES :A SYNDEMIC APPROACH

|                                 |                                                                                                                                                                                                                                                                                                                                                                                                                                                                                                                                                                                                                                                                                                                                                                                                                                                                                                                                                                                                                                                                                                                                                                                                                                                                                                                     |
|---------------------------------|---------------------------------------------------------------------------------------------------------------------------------------------------------------------------------------------------------------------------------------------------------------------------------------------------------------------------------------------------------------------------------------------------------------------------------------------------------------------------------------------------------------------------------------------------------------------------------------------------------------------------------------------------------------------------------------------------------------------------------------------------------------------------------------------------------------------------------------------------------------------------------------------------------------------------------------------------------------------------------------------------------------------------------------------------------------------------------------------------------------------------------------------------------------------------------------------------------------------------------------------------------------------------------------------------------------------|
| Journal:                        | <i>BMJ Open</i>                                                                                                                                                                                                                                                                                                                                                                                                                                                                                                                                                                                                                                                                                                                                                                                                                                                                                                                                                                                                                                                                                                                                                                                                                                                                                                     |
| Manuscript ID                   | bmjopen-2022-069246.R1                                                                                                                                                                                                                                                                                                                                                                                                                                                                                                                                                                                                                                                                                                                                                                                                                                                                                                                                                                                                                                                                                                                                                                                                                                                                                              |
| Article Type:                   | Original research                                                                                                                                                                                                                                                                                                                                                                                                                                                                                                                                                                                                                                                                                                                                                                                                                                                                                                                                                                                                                                                                                                                                                                                                                                                                                                   |
| Date Submitted by the Author:   | 17-Feb-2023                                                                                                                                                                                                                                                                                                                                                                                                                                                                                                                                                                                                                                                                                                                                                                                                                                                                                                                                                                                                                                                                                                                                                                                                                                                                                                         |
| Complete List of Authors:       | <p>Granados, Ysabel; Hospital "Dr. Manuel Núñez Tovar,"<br/>Gastelum Strozzi, Alfonso; Universidad Nacional Autonoma de Mexico, ICAT<br/>Alvarez-Nemegyei, Jose; Hospital Star Medica Merida<br/>Quintana, Rosana; Hospital Provincial de Rosario, Reumatology<br/>Julian-Santiago, Flor; Universidad Nacional Autonoma de Mexico<br/>Santos, Ana; Universidad de La Sabana, Rheumatology<br/>Guevara-Pacheco, Sergio; Universidad de Cuenca<br/>Loyola-Sanchez, Adalberto; University of Alberta Faculty of Medicine &amp; Dentistry<br/>Goycochea-Robles, Maria Victoria; Universidad Nacional Autonoma de Mexico, Grupo Cochrane<br/>Juarez, Vicente; Hospital Señor del Milagro<br/>Garza-Elizondo, Mario Alberto; Hospital Universitario "Dr. José Eleuterio González" de la Universidad Autónoma de Nuevo León, Internal Medicine, Rheumatology Service<br/>Rueda, Juan; Universidad de La Sabana, Department of Rheumatology<br/>Burgos-Vargas, Ruben; Hospital General de Mexico Dr Eduardo Liceaga, Rheumatology<br/>Londoño, John; Universidad de La Sabana, Rheumatology; Hospital Militar Central, Rheumatology<br/>Pons-Estel, Bernardo; Centro Regional de Enfermedades Autoinmune y Reumáticas (CREAR)<br/>Pelaez-Ballestas, Ingris; Hospital General de México Dr Eduardo Liceaga, Rheumatology</p> |
| <b>Primary Subject Heading</b>: | Rheumatology                                                                                                                                                                                                                                                                                                                                                                                                                                                                                                                                                                                                                                                                                                                                                                                                                                                                                                                                                                                                                                                                                                                                                                                                                                                                                                        |
| Secondary Subject Heading:      | Epidemiology, Global health, Public health                                                                                                                                                                                                                                                                                                                                                                                                                                                                                                                                                                                                                                                                                                                                                                                                                                                                                                                                                                                                                                                                                                                                                                                                                                                                          |
| Keywords:                       | EPIDEMIOLOGY, PUBLIC HEALTH, RHEUMATOLOGY, STATISTICS & RESEARCH METHODS                                                                                                                                                                                                                                                                                                                                                                                                                                                                                                                                                                                                                                                                                                                                                                                                                                                                                                                                                                                                                                                                                                                                                                                                                                            |
|                                 |                                                                                                                                                                                                                                                                                                                                                                                                                                                                                                                                                                                                                                                                                                                                                                                                                                                                                                                                                                                                                                                                                                                                                                                                                                                                                                                     |

1  
2  
3  
4  
5  
6  
7  
8  
9  
10  
11  
12  
13  
14  
15  
16  
17  
18  
19  
20  
21  
22  
23  
24  
25  
26  
27  
28  
29  
30  
31  
32  
33  
34  
35  
36  
37  
38  
39  
40  
41  
42  
43  
44  
45  
46  
47  
48  
49  
50  
51  
52  
53  
54  
55  
56  
57  
58  
59  
60

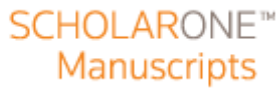



I, the Submitting Author has the right to grant and does grant on behalf of all authors of the Work (as defined in the below author licence), an exclusive licence and/or a non-exclusive licence for contributions from authors who are: i) UK Crown employees; ii) where BMJ has agreed a CC-BY licence shall apply, and/or iii) in accordance with the terms applicable for US Federal Government officers or employees acting as part of their official duties; on a worldwide, perpetual, irrevocable, royalty-free basis to BMJ Publishing Group Ltd ("BMJ") its licensees and where the relevant Journal is co-owned by BMJ to the co-owners of the Journal, to publish the Work in this journal and any other BMJ products and to exploit all rights, as set out in our [licence](#).

The Submitting Author accepts and understands that any supply made under these terms is made by BMJ to the Submitting Author unless you are acting as an employee on behalf of your employer or a postgraduate student of an affiliated institution which is paying any applicable article publishing charge ("APC") for Open Access articles. Where the Submitting Author wishes to make the Work available on an Open Access basis (and intends to pay the relevant APC), the terms of reuse of such Open Access shall be governed by a Creative Commons licence – details of these licences and which [Creative Commons](#) licence will apply to this Work are set out in our licence referred to above.

Other than as permitted in any relevant BMJ Author's Self Archiving Policies, I confirm this Work has not been accepted for publication elsewhere, is not being considered for publication elsewhere and does not duplicate material already published. I confirm all authors consent to publication of this Work and authorise the granting of this licence.

1  
2  
3 1 INEQUITY AND VULNERABILITY IN LATIN AMERICAN INDIGENOUS AND  
4  
5 2 NON-INDIGENOUS POPULATIONS WITH RHEUMATIC DISEASES:  
6  
7  
8 3 A SYNDEMIC APPROACH  
9

---

10  
11 4 1. Ysabel Granados, MD.  
12

13  
14 5 ORCID: 000-0002-7148-4060  
15

16  
17 6 e-mail: [ymgranados@gmail.com](mailto:ymgranados@gmail.com)  
18

19  
20  
21 7 2. Alfonso Gastelum-Strozzi, PhD,  
22

23  
24 8 ORCID: 0000-0001-9668-5822  
25

26  
27  
28 9 e-mail: [alfonso.gastelum@icat.unam.mx](mailto:alfonso.gastelum@icat.unam.mx)  
29

30  
31 10 3. José Alvarez-Nemegyei, MD, PhD.  
32

33  
34 11 ORCID: 0000-0002-5499-5280  
35

36  
37 12 e-mail: [nemegyei@yahoo.com.mx](mailto:nemegyei@yahoo.com.mx)  
38

39  
40 13 4. Rosana Quintana, MD, PhD.  
41

42  
43 14 ORCID: 0000-0003-0643-2755  
44

45  
46 15 e-mail: [rosanaquintana@gmail.com](mailto:rosanaquintana@gmail.com)  
47

48  
49 16 5. Flor Julian-Santiago , MD, PhD  
50

51  
52 17 ORCID: 0000-0001-6137-045X  
53

54  
55 18 e-mail: [maifjs@hotmail.com](mailto:maifjs@hotmail.com)  
56  
57  
58  
59  
60

1  
2  
3 19 6. Ana María Santos, PhD  
4

5  
6 20 ORCID: ORCID 0000-0002-1973-8043  
7

8  
9 21 e-mail: [ana.santos@unisabana.edu.co](mailto:ana.santos@unisabana.edu.co)  
10

11  
12 22 7. Sergio Guevara, MD, PhD.  
13

14  
15 23 ORCID: 0000-0001-5798-6200  
16

17  
18 24 e-mail: [sergio\\_guevarap@yahoo.com](mailto:sergio_guevarap@yahoo.com)  
19

20  
21 25 8. Adalberto Loyola-Sanchez A, MD, PhD.  
22

23  
24 26 ORCID: 0000-0002-0082-2907  
25

26  
27 27 e-mail: [adalbert@ualberta.ca](mailto:adalbert@ualberta.ca)  
28

29  
30 28 9. María Victoria Goycochea-Robles, MD, MSc.  
31

32  
33 29 ORCID: 0000-002-92488511  
34

35  
36 30 e-mail: [mavis.goycochea@gmail.com](mailto:mavis.goycochea@gmail.com)  
37

38  
39 31 10. Vicente Juárez, MD.  
40

41  
42 32 ORCID: 0000-0003-3865-087X  
43

44  
45 33 e-mail: [vtejuarez@gmail.com](mailto:vtejuarez@gmail.com)  
46

47  
48 34 11. Mario Garza-Elizondo, MD, PhD  
49

50  
51 35 ORCID: 0000-0002-8992-4714  
52

53  
54 36 e-mail: [mariogarz@hotmail.com](mailto:mariogarz@hotmail.com)  
55



1  
2  
3 37 12. Juan Rueda, MD, PhD candidate.  
4

5  
6 38 ORCID: 0000-0002-6263-2914  
7

8  
9 39 e-mail: [juan.rueda@unisabana.edu.co](mailto:juan.rueda@unisabana.edu.co)  
10

11  
12 40 13. Ruben Burgos-Vargas, MD.  
13

14  
15 41 ORCID: 0000-0005-1058-8955  
16

17  
18 42 e-mail: [burgosv@gmail.com](mailto:burgosv@gmail.com)  
19

20  
21 43 14. John Londoño, MD, PhD.  
22

23  
24 44 ORCID: 0000-0003-1074-644X  
25

26  
27 45 e-mail: [john.londono@unisabana.edu.co](mailto:john.londono@unisabana.edu.co)  
28

29  
30 46 15. Bernardo A. Pons-Estel, MD.  
31

32  
33 47 ORCID: 0000-0003-2518-0266  
34

35  
36 48 e-mail: [bponsestel@gmail.com](mailto:bponsestel@gmail.com)  
37

38  
39 49 16. Ingris Peláez-Ballestas, MD, PhD<sup>1</sup>  
40

41  
42 50 ORCID: 0000-0001-5188-7375  
43

44  
45 51 e-mail: [pelaezin@gmail.com](mailto:pelaezin@gmail.com).  
46

47 52 Pons-Estel B.A and Peláez-Ballestas I. on behalf of the Latin American Study Group of  
48

49 53 Rheumatic Diseases in Indigenous Peoples (GLADERPO).  
50

51  
52  
53 54 Affiliations:  
54

55 55 1. Hospital “Dr. Manuel Núñez Tovar,” Maturín, Monagas, Venezuela.  
56  
57  
58  
59  
60

- 1  
2  
3 56 2. Instituto de Ciencias Aplicadas y Tecnología, Universidad Nacional Autónoma de México,  
4  
5 57 Mexico City, Mexico.  
6  
7
- 8 58 3. Rheumatology Staff. Hospital Star Médica. Mérida, Yucatán, México  
9
- 10  
11 59 4. Centro Regional de Enfermedades Autoinmunes y Reumáticas (CREAR). Rosario, Santa  
12  
13 60 Fe, Argentina.  
14  
15
- 16 61 5. Independent researcher, Oaxaca, Mexico  
17
- 18  
19 62 6. Grupo Espondiloartropatías .Universidad La Sabana, Bogotá, Colombia.  
20  
21
- 22 63 7. Universidad de Cuenca, Cuenca, Ecuador.  
23  
24
- 25 64 8. Faculty of Medicine and Dentistry, University of Alberta, Edmonton, Canada.  
26  
27
- 28 65 9. Grupo Cochrane-UNAM- Hospital ABC Santa Fe, Ciudad de Mexico  
29  
30
- 31 66 10. Hospital Señor del Milagro, Salta, Argentina.  
32  
33
- 34 67 11. Hospital Universitario “José Eleuterio Gonzalez,” Monterrey, Nuevo León, Mexico.  
35  
36
- 37 68 12. Grupo Espondiloartropatías.Universidad La Sabana, Bogotá, Colombia.  
38  
39
- 40 69 13. Rheumatology Unit, Hospital General de México “Dr. Eduardo Liceaga,” Mexico City,  
41  
42 70 Mexico.  
43  
44
- 45 71 14. Grupo Espondiloartropatías. Universidad La Sabana, Bogotá, Colombia.  
46  
47
- 48 72 15. Centro Regional de Enfermedades Autoinmunes y Reumáticas (CREAR). Rosario,  
49  
50 73 Santa Fe, Argentina.  
51  
52
- 53 74 16. Rheumatology Unit, Hospital General de México “Dr. Eduardo Liceaga,” Mexico City,  
54  
55 75 Mexico.  
56  
57  
58  
59  
60

1  
2  
3 76 Corresponding author  
4  
5

6 77 Pelaez-Ballestas I., Ph.D. Rheumatology Unit, Hospital General de México “Dr. Eduardo  
7

8 78 Liceaga.” Dr. Balmis 148, Colonia Doctores, 06726, Mexico City. E-mail:  
9

10 79 pelaezin@gmail.com. Phone: +52 (55) 5004-3849.  
11  
12

13 80 **Keywords:** Rheumatic diseases, inequity, vulnerability, Syndemics, Latin America, network  
14

15 81 analysis.  
16  
17

18 82 **Running head:** Inequity in Latin American people with rheumatic disease  
19  
20

21 83  
22  
23

24 84 **Word count: 3850.**  
25  
26

27 85  
28  
29

30 86 **Abstract.**  
31  
32

33 87 Syndemics are a framework that documents health inequities and vulnerabilities in  
34

35 88 populations with rheumatic diseases. Compared to other approaches, syndemics are able to  
36  
37

38 89 conjunctly consider epidemiological, biological, sociodemographic and economic factors,  
39

40 90 and their interactions.  
41  
42

43 91 **Objective.** To estimate health inequity and vulnerability among Indigenous and non-  
44

45 92 Indigenous populations with rheumatic and musculoskeletal disease (RMD) in Latin America  
46  
47

48 93 using the syndemic approach.  
49  
50

51 94 **Design:** This is a secondary analysis of a previously published large-scale study on the  
52

53 95 prevalence of RMD.  
54  
55  
56  
57  
58  
59  
60

1  
2  
3 96 **Setting:** Studies carried out in five Latin American countries (Argentina, Colombia, Ecuador,  
4  
5 97 Mexico and Venezuela). Health inequity and vulnerability in RMD were identified through  
6  
7 98 a syndemic approach using network and cluster analysis.  
8  
9

10  
11 99 **Participants.** A total of 44,560 individuals were studied: 29.78% self-identified as  
12  
13 100 Indigenous, 60.92% were female, the mean age was 43.25 years. Twenty clusters were  
14  
15 101 identified in the Indigenous population and seventeen in the non-Indigenous population.  
16  
17

18 102 **Results.** The variables associated with RMD among Indigenous populations were rurality,  
19  
20 103 public health system, high joint biomechanical stress, greater pain, disability and alcoholism;  
21  
22 104 and among non-Indigenous people they were being a woman, urban origin, older age, private  
23  
24 105 health system, joint biomechanical stress, greater pain and disability. We identified different  
25  
26 106 health inequities among RMD patients (i.e. lower educational attainment, more  
27  
28 107 comorbidities), associated with factors such as Indigenous self-identification and rural  
29  
30 108 residence.  
31  
32  
33  
34

35 109 **Conclusions.** A syndemic approach enables us to identify health inequities in RMD, as  
36  
37 110 shown by higher prevalence of comorbidities, disability and socioeconomic factors like lower  
38  
39 111 educational attainment. These inequities exist for the overall population of patients with  
40  
41 112 RMD, though it is more evident in Indigenous groups with added layers of vulnerability.  
42  
43  
44

#### 45 113 **Strengths and limitations of this study**

46  
47

- 48 114 • Syndemics are a framework using strategies from artificial intelligence to perform  
49  
50 115 complex analyses that document health inequities.  
51  
52 116 • The analysis of clusters and networks groups individuals by variables to document  
53  
54 117 inequity, the principal objective of this study.  
55  
56  
57  
58  
59  
60

1  
2  
3  
4  
5  
6  
7  
8  
9  
10  
11  
12  
13  
14  
15  
16  
17  
18  
19  
20  
21  
22  
23  
24  
25  
26  
27  
28  
29  
30  
31  
32  
33  
34  
35  
36  
37  
38  
39  
40  
41  
42  
43  
44  
45  
46  
47  
48  
49  
50  
51  
52  
53  
54  
55  
56  
57  
58  
59  
60

118  
119  
120

- The cross-sectional nature of this study is a limitation to establish causality.

For peer review only

1  
2  
3 121  
4 122 **Introduction**

5  
6  
7 123 Rheumatic and musculoskeletal diseases (RMD) are a significant cause of morbidity and  
8  
9 124 mortality worldwide [1]; they produce substantial socioeconomic impact and deterioration of  
10  
11 125 quality of life in patients, who represent approximately 10% of the general population [2].  
12  
13 126 Since 2000, the World Health Organization (WHO) has recognized RMD as a relevant health  
14  
15 127 problem, due to the increase in secondary disability and a greater demand for health resources  
16  
17 128 [3].

18  
19  
20  
21 129 There is now a greater need to define global strategies for the timely access of patients with  
22  
23 130 RMD to health systems [4], including the evaluation of social determinants, such as gender,  
24  
25 131 education, work, income level, ethnicity and place of residence [5].

26  
27  
28  
29 132 Latin America is an extensive geographic area made up of 26 countries, characterized by  
30  
31 133 multiculturalism and great contrasts in political, social and economic aspects [4,6].  
32  
33 134 Significant social inequity has been documented, with marked disparities in health coverage  
34  
35 135 for individuals and social groups; these inequities are observed within and among countries  
36  
37 136 in the region [7]. Epidemiological studies have documented a prevalence of RMD between  
38  
39 137 23% and 46.5% in Latin America, with more aggressive presentations (higher morbidity and  
40  
41 138 mortality) among Indigenous populations. Genetic predisposition to systemic lupus  
42  
43 139 erythematosus (SLE) has also been identified among Indigenous groups [8], as well as a high  
44  
45 140 prevalence of rheumatoid arthritis (RA) among Indigenous Mayan groups of Yucatan,  
46  
47 141 Mexico [9] and the Qom of Argentina [10,11].

48  
49  
50  
51  
52  
53 142 Despite the high prevalence of RMD in the Latin American region, these diseases continue  
54  
55 143 to have a low priority in the planning of health policies [4]. Overall, the healthcare system in

1  
2  
3 144 Latin America is highly fragmented and disconnected. For rheumatology care specifically,  
4  
5 145 33.5% of rheumatologists work in public/government hospitals, 28.8% in private practice,  
6  
7 146 20.8% in private hospitals, and 15.5% in university hospitals, most of them distributed in  
8  
9 147 large urban areas, with a significant lack in small cities and none in rural areas [12–16].

10 148 These differences in disease prevalence and distribution of health resources which limit  
11  
12 149 access to rheumatology care in Latin America can be understood as health inequities. Health  
13  
14 149 access to rheumatology care in Latin America can be understood as health inequities. Health  
15  
16 150 inequity is not synonymous with inequality. Inequity implies the idea of injustice and of lack  
17  
18 151 of actions to avoid *preventable* differences. On the other hand, inequality describes  
19  
20 152 differences in health outcomes that are not fundamentally unfair [12]. Health inequity is  
21  
22 153 deeply connected to vulnerability. From a biomedical perspective, vulnerability means being  
23  
24 154 susceptible to certain diseases or to environmental risk. However, vulnerability can also be  
25  
26 154 susceptible to certain diseases or to environmental risk. However, vulnerability can also be  
27  
28 155 understood as a product of the interaction between available resources (personal, family,  
29  
30 156 community, cultural, economic, institutional), the sociocultural context of the patient,  
31  
32 157 structural elements, and exposure to risk [12,17–20]. Therefore, vulnerability is a result of  
33  
34 158 health inequity.

35  
36  
37 159 To document inequity in health, the syndemic model has proven useful to analyze the  
38  
39 160 interaction of disease with social determinants that condition inequality in health, and how  
40  
41 161 these lead to increased physical and environmental vulnerability [17,18,21,22]. Syndemics  
42  
43 162 aggregate the interaction of two or more concurrent diseases, as well as the sociocultural and  
44  
45 163 healthcare contexts which can exacerbate the negative effects of this interaction on the health  
46  
47 164 of individuals, communities, and societies [21]. The syndemic framework evaluates the  
48  
49 165 interaction of any type of disease in conditions of health inequality caused by poverty,  
50  
51 166 stigmatization, stress or structural violence [21–23]. Thus, syndemics encompass social  
52  
53 167 determinants, vulnerabilities, and inequities and inequalities in health as well.  
54  
55  
56  
57  
58  
59  
60

1  
2  
3 168 Previous studies have shown that syndemics are a good comprehensive model to document  
4  
5 169 inequity and inequality in health. In a study of RMD in Indigenous populations in Latin  
6  
7 170 America, as well as a study of patients with low back pain, disease is associated with being  
8  
9 171 a woman, belonging to an indigenous population, and having low educational attainment. It  
10  
11 172 is also exacerbated by the presence of comorbidities, especially those within the mental  
12  
13 173 health domain [8,24].  
14

15  
16  
17 174 Given the intricacy of a syndemic approach, conventional statistical methodologies are  
18  
19 175 insufficient. Instead, using strategies from graph theory (network analysis) and machine  
20  
21 176 learning (cluster analysis) is necessary to perform complex analyses that document health  
22  
23 177 inequities comprehensively. The syndemic approach is useful to identify health inequities  
24  
25 178 and vulnerabilities in different population groups.  
26  
27  
28

29  
30 179 We hypothesize that there is a syndemic in Latin American populations suffering from  
31  
32 180 rheumatic diseases, associated with comorbidities such as diabetes and hypertension, and  
33  
34 181 living in a fragmented health care context. We also hypothesize that this phenomenon is more  
35  
36 182 significant in vulnerable populations such as Indigenous peoples. Therefore, we proposed the  
37  
38 183 following study to measure syndemics comparatively between Indigenous and non-  
39  
40 184 Indigenous populations with RMD in Latin America.  
41  
42  
43

## 44 185 **MATERIALS AND METHODS**

### 46 47 186 **Design**

48  
49 187 This is a secondary analysis, based on multilevel network analysis using a syndemic  
50  
51 188 framework, of a previously published large-scale cross-sectional study on the prevalence of  
52  
53 189 RMD in five Latin American countries.  
54  
55  
56  
57  
58  
59  
60



## 190 **Data sources**

191 We used a database compiled by GEEMA (Grupo de Estudios Epidemiológicos de  
192 Enfermedades Músculo Articulares), COPCORD-LATAM (Community Oriented Program  
193 for Control of Rheumatic Diseases-Latin America) and GLADERPO (Grupo Latino  
194 Americano de Estudios de Enfermedades Reumáticas en Pueblos Originarios).

195 GLADERPO recorded information on the Qom and Wichí Indigenous populations of  
196 Argentina [10,25], Saraguro of Ecuador [26], Yucatec-Maya and Mixtec of Mexico [8,9] and  
197 the Chaimas, Kariñas and Warao of Venezuela [27].

198 COPCORD-LATAM was developed with the results of epidemiological studies conducted  
199 on the non-Indigenous populations of Colombia [28], Ecuador [29], Mexico [30] and  
200 Venezuela [31], using COPCORD (Community Oriented Program for Control of Rheumatic  
201 Diseases) methodology, culturally and linguistically adapted to the different communities  
202 studied, and subsequently validated in each country.

203 The COPCORD methodology consists of trained health personnel administering a  
204 questionnaire house to house, which identifies patients with pain of non-traumatic origin,  
205 historical and in the last seven days. The participation of certified rheumatologists allowed  
206 for the diagnosis of RMDs [29–33].

207 The same measurements were collected in all the studies: sociodemographic variables, joint  
208 biomechanical stress, comorbidities, physical disability and accessibility to local health care.

209 **Sociodemographic variables** such as age, gender, self-defined ethnicity according to the  
210 laws of each country (Indigenous and non-Indigenous), formal schooling (numbers of years  
211 studied in the official education system) and place of residence (urban/rural).

1  
2  
3 212 **Level of joint biomechanical stress** was classified according to self-reported occupation.

4  
5 213 Individuals were asked for a visual recreation of their activity, according to the degree of  
6  
7 214 effort and the body regions involved. Following a survey on the level of physical load  
8  
9 215 repetitiveness, each occupation was classified into three levels of joint biomechanical stress  
10  
11 216 in the workplace: high (e.g. farmers, homemakers, machine operators), medium (e.g. artisans,  
12  
13 217 drivers, technicians) and low (e.g. merchants, professionals, students, teachers, retirees).

14  
15 218 **Comorbidities** were self-reported [32,33], while physical disability was measured with the  
16  
17 219 **Health Assessment Questionnaire-Disability Index (HAQ-DI)**, validated for each country  
18  
19 220 and with an established cut-off point of greater than 0.8 [34].

20  
21 221 **Accessibility to the local healthcare system** was classified by conducting an exercise of  
22  
23 222 comparisons and equivalences among the researchers from the five participating countries.

24  
25 223 Considering all characteristics of the healthcare systems, the three subgroups used to classify  
26  
27 224 accessibility were: *partial coverage*, involving a public system that covers physician  
28  
29 225 appointments, laboratory tests and basic but not high specialty medications; *full coverage*,  
30  
31 226 involving a social security system that covers all health expenses; and *private coverage*,  
32  
33 227 where patients pay fully for their care.

34  
35 228

## 36 229 **Analysis**

37  
38 230 A multi-phase analysis was performed.

39  
40 231 Phase 1. We applied inferential statistics (i.e., bivariate analysis) to explore associations  
41  
42 232 between ethnicity (Indigenous or non-Indigenous) and country of origin, and  
43  
44 233 sociodemographic characteristics (i.e., age, gender, formal schooling, urban/rural residence),  
45  
46  
47  
48  
49  
50  
51  
52  
53  
54  
55  
56  
57  
58  
59  
60

234 rheumatic diagnoses, comorbidities, disability (HAQ-DI) and levels of accessibility (partial,  
235 total and private coverage).

236 Phase 2. We performed simple logistic regression models to identify factors (i.e.,  
237 sociodemographic, comorbidities, disability, accessibility, and joint biomechanical stress)  
238 associated with RMD diagnosis (i.e., present or absent) as a dependent variable by ethnicity  
239 (Indigenous vs. non-Indigenous). We estimated odds ratios (OR), along with 95% confidence  
240 intervals (CI 95%) and significance (p).

241 Phase 3. We used a network analysis approach [35] to generate groups with similar  
242 characteristics (e.g., sociodemographic, country, comorbidities, diagnoses, etc.) called clusters.  
243 These clusters helped to determine the negative characteristics associated with disease and  
244 disability using the syndemic framework. The network analysis method requires the  
245 definition of a characteristic that allows creation of connections between subjects; a measure  
246 of similarity was defined to create these. The similarity measure determined the relationships  
247 between the different subjects within the database. The measure of similarity evaluated the  
248 number of similarities between two subjects regarding the results of their evaluations. To  
249 construct the first part of the similarity measure, a vector was defined with the following  
250 variables: a) accessibility level, b) level of joint biomechanical stress, and c) urban/rural  
251 residence. Using the cosine similarity method, this vector was used to calculate a similarity index  
252 for each individual concerning the rest of the population [36]. The final similarity index was  
253 obtained by applying a weighted difference by years of education between each individual.

254 The similarity index was used to determine an individual's degree of similarity to the rest of  
255 the population and to build the relations between individuals. In the network definition, each  
256 individual is a node; an axis of relations is generated when the similarity index between two

1  
2  
3 257 individuals is greater than the average of the similarity indices plus the standard deviation of  
4  
5 258 the whole population [37]. The network obtained is simulated in Gephi [38] and the final  
6  
7 259 position of the nodes or individuals is used to define the new groups using the DBSCAN  
8  
9  
10 260 method [39].  
11

12  
13 261 Due to the complexity of the representation of the clusters, we conducted a consensus process  
14  
15 262 among all researchers to select the most relevant clusters regarding socio-economic and  
16  
17 263 clinical impact, which included healthcare access, disability, educational level, and type of  
18  
19 264 RMD. Selected clusters were further analyzed in network analysis, including the following  
20  
21 265 factors in a hierarchical order of importance: 1) prevalence of RMD, 2) prevalence of  
22  
23 266 rheumatoid arthritis (RA), and 3) the number of individuals comprising the cluster. All  
24  
25 267 researchers assigned every cluster a weighted score for each of the three selected variables.  
26  
27 268 Finally, six clusters were selected per group (i.e., Indigenous and non-Indigenous) according  
28  
29 269 to their amount of representation of health inequity factors.  
30  
31  
32  
33

34 270 Phase 4. We conducted a sensitivity analysis to confirm no biases using a randomly selected  
35  
36 271 weighted sample of Indigenous/non-Indigenous populations from the three countries that  
37  
38 272 studied both at the same time (Ecuador, Mexico, and Venezuela), and two countries that only  
39  
40 273 had samples of Indigenous (Argentina) or non-Indigenous (Colombia) populations. The  
41  
42 274 clusters obtained through this analysis were defined by factors such as living in a rural setting,  
43  
44 275 lower health coverage, and greater disability, which went beyond our initial Indigenous/non-  
45  
46 276 Indigenous classification and impacted the management of rheumatic diseases. These  
47  
48 277 emerging differences can be used to document inequity insofar as they highlight the variables  
49  
50 278 which negatively affect the health of people with RMD.  
51  
52  
53  
54  
55  
56  
57  
58  
59  
60

## 279 Patient and Public Involvement

280 Patients or the public WERE NOT involved in the design or conduct, or reporting, or  
 281 dissemination plans of our research. The members of the public were involved at original  
 282 stages of each study including as cultural liaisons. We disseminated the main results to all  
 283 participants and health authorities to improve health conditions.

284

## 285 RESULTS

286 A total of 44,560 individuals from five Latin American countries (Argentina, Colombia,  
 287 Ecuador, Mexico and Venezuela) were studied. Of these, 29.78% (13,269) self-identified as  
 288 Indigenous and 27,145 (60.92%) were female, with an average age of 43.25 (SD = 18.02)  
 289 years and a mean of 8.06 (SD = 5.02) years of schooling. RMD was diagnosed in 13,528  
 290 (30.36%) individuals. Rheumatic regional pain syndromes (RRPS) was the rheumatic  
 291 diagnosis with the highest prevalence (6100, 13.69%) followed by osteoarthritis (3690,  
 292 8.28%), while RA was reported in (877, 1.97%) individuals (Table 1).

293 Table 1. Comparison of sociodemographic characteristics, country, health coverage, rheumatic  
 294 diagnosis, pain, disability and comorbidities between Indigenous and non-Indigenous groups.

|                                                 | <b>Indigenous<br/>n = 13269<br/>(29.78)</b> | <b>Non-<br/>Indigenous<br/>n = 31291<br/>(70.22)</b> | <b>Total<br/>n = 44560<br/>(100.00)</b> | <b>p</b> |
|-------------------------------------------------|---------------------------------------------|------------------------------------------------------|-----------------------------------------|----------|
| Gender (female)                                 | 8010 (60.37)                                | 19135 (61.15)                                        | 27145 (60.92)                           | 0.123    |
| Age (years), mean (SD)                          | 42.23 (18.17)                               | 43.69 (17.94)                                        | 43.25 (18.02)                           | <0.001   |
| Urban setting                                   | 3877 (29.22)                                | 24331 (77.76)                                        | 28208 (63.30)                           | <0.001   |
| Educational level, mean number of years<br>(SD) | 7.13 (5.07)                                 | 8.46 (4.95)                                          | 8.06 (5.02)                             | <0.001   |
| Countries                                       |                                             |                                                      |                                         |          |
| Argentina                                       | 2295 (17.30)                                | 0 (0.00)                                             | 2295 (5.15)                             | <0.001   |
| Colombia                                        | 234 (1.76)                                  | 6454 (20.63)                                         | 6688 (15.01)                            | <0.001   |
| Ecuador                                         | 2682 (20.21)                                | 4858 (15.53)                                         | 7540 (16.92)                            | <0.001   |
| Mexico                                          | 6525 (49.17)                                | 16085 (51.40)                                        | 22610 (50.74)                           | <0.001   |
| Venezuela                                       | 1533 (11.55)                                | 3894 (12.44)                                         | 5427 (12.18)                            | <0.01    |
| Health coverage *                               |                                             |                                                      |                                         |          |
| Full                                            | 3481 (26.23)                                | 4493 (14.36)                                         | 7974 (17.89)                            | <0.001   |
| Partial                                         | 7441 (56.08)                                | 18314 (58.53)                                        | 25755 (57.80)                           | <0.001   |

|                                                                                 |              |               |               |        |
|---------------------------------------------------------------------------------|--------------|---------------|---------------|--------|
| Private                                                                         | 795 (5.99)   | 1741 (5.56)   | 2536 (5.69)   | 0.079  |
| Other**                                                                         | 330 (2.49)   | 221 (0.71)    | 551 (1.24)    | <0.001 |
| Joint biomechanical stress ***                                                  |              |               |               |        |
| High                                                                            | 5000 (37.68) | 10199 (32.59) | 15199 (34.11) | <0.001 |
| Medium                                                                          | 1538 (11.59) | 4720 (15.08)  | 6258 (14.04)  | <0.001 |
| Low                                                                             | 4014 (30.25) | 9213 (29.44)  | 13227 (29.68) | 0.090  |
| Unspecified                                                                     | 1815 (13.68) | 2784 (8.90)   | 4599 (10.32)  | <0.001 |
| Rheumatic disease                                                               |              |               |               |        |
| Totals                                                                          | 4012 (30.24) | 9516 (30.41)  | 13528 (30.36) | 0.721  |
| Osteoarthritis                                                                  | 1433 (10.80) | 2257 (7.21)   | 3690 (8.28)   | <0.001 |
| Rheumatoid arthritis                                                            | 278 (2.10)   | 599 (1.91)    | 877 (1.97)    | 0.223  |
| Back pain                                                                       | 1548 (11.67) | 1281 (4.09)   | 2829 (6.35)   | <0.001 |
| RRPS                                                                            | 505 (3.81)   | 5595 (17.88)  | 6100 (13.69)  | <0.001 |
| Musculoskeletal disorders                                                       | 521 (3.93)   | 664 (2.12)    | 1185 (2.66)   | <0.001 |
| Fibromyalgia                                                                    | 181 (1.36)   | 212 (0.68)    | 393 (0.88)    | <0.001 |
| Other ****                                                                      | 45 (0.34)    | 118 (0.38)    | 163 (0.37)    | 0.602  |
| Pain                                                                            |              |               |               |        |
| Historical pain                                                                 | 5408 (40.76) | 11780 (37.65) | 17188 (38.57) | <0.001 |
| Non-traumatic pain (7 days)                                                     | 2258 (17.02) | 8024 (25.64)  | 10282 (23.07) | <0.001 |
| Physical disability (Health Assessment Questionnaire-Disability Index (HAQ-DI)) |              |               |               |        |
| HAQ-DI $\geq$ 0.8                                                               | 761 (5.74)   | 2558 (8.17)   | 3319 (7.45)   | <0.001 |
| Comorbidities                                                                   |              |               |               |        |
| Diabetes mellitus                                                               | 814 (6.13)   | 2279 (7.28)   | 3093 (6.94)   | <0.001 |
| High blood pressure                                                             | 1649 (12.43) | 5613 (17.94)  | 7262 (16.30)  | <0.001 |
| Cardiovascular disease                                                          | 415 (3.13)   | 1106 (3.53)   | 1521 (3.41)   | 0.033  |
| Smoking                                                                         | 1138 (8.58)  | 4996 (15.97)  | 6134 (13.77)  | <0.001 |
| Alcoholism                                                                      | 1751 (13.20) | 1068 (3.41)   | 2819 (6.33)   | <0.001 |
| Anxiety/depression                                                              | 2304 (17.36) | 3727 (11.91)  | 6031 (13.53)  | <0.001 |
| No comorbidities                                                                | 6391 (48.16) | 14450 (46.18) | 20841 (46.77) | <0.001 |

\* Missing data: 1222 (9.21%) Indigenous and 6522 (20.84%) non-Indigenous, total 7744 (17.38%)

\*\* Other: Traditional healthcare

\*\*\* Missing data: 902 (7.01%) indigenous and 4375 (13.80%) not indigenous.

\*\*\*\* Others: *Indigenous*: 29 ankylosing spondylitis, 9 gout, 4 scleroderma and 3 psoriasis. *Non-Indigenous*: 39 ankylosing spondylitis, 74 gout, 1 scleroderma and 4 psoriasis.

A lower urban origin (18.71%) and less years of formal schooling (6.74, SD = 5.71) were observed in the Indigenous population, while the non-Indigenous population had a predominance of private coverage (10.89%). High joint biomechanical stress (47.01%) and historical pain (39.99%) were more frequent in Indigenous populations. The prevalence of RMD was similar between populations studied; RA was more prevalent in Indigenous people (2.26% vs 1.74%), but not significantly. Non-Indigenous people had greater disability (8.15% with HAQ  $\geq$ 0.8) and higher prevalence of diabetes mellitus, high blood pressure and

309 smoking (7.09%, 18.59% and 15.16%). Among Indigenous people, alcohol consumption and  
 310 anxiety/depression were more prevalent (13.98% and 19.55%) (see supplementary table).

311 In terms of the sub-analysis by country, Argentina had the youngest individuals (35.98,  
 312 SD:=14.25); Ecuador and Colombia recorded a higher level of schooling (9.31, SD= 5.49)  
 313 and a higher prevalence of RMD (47.69% and 40.76%); Argentina and Mexico had the  
 314 highest prevalence of RA (3.01% and 2.22%); Colombia had a higher prevalence of historical  
 315 and non-traumatic pain (73.95% and 43.94%); and Ecuador had the highest number of  
 316 disabled people (8.70% with HAQ  $\geq$ 0.8) (Table 2).

317

318 Table 2. Comparison of sociodemographic characteristics, health coverage, rheumatic diagnosis,  
 319 pain, disability, and comorbidities between populations of five Latin American countries.

|                                                 | Argentina<br>n (%)<br>n = 2295 (5.15) | Colombia<br>n (%)<br>n = 6688<br>(15.01) | Ecuador<br>n (%)<br>n = 7540<br>(16.92) | Mexico<br>n (%)<br>n = 22610 (50.74) | Venezuela<br>n (%)<br>n = 5427<br>(12.18) | Totals*<br>n (%)<br>n = 44560<br>(100.00) | p      |
|-------------------------------------------------|---------------------------------------|------------------------------------------|-----------------------------------------|--------------------------------------|-------------------------------------------|-------------------------------------------|--------|
| Ethnicity (Indigenous)                          | 2295 (100.00)                         | 234 (3.50)                               | 2682 (35.57)                            | 6525 (28.86)                         | 1533 (28.25)                              | 13269 (29.78)                             | <0.001 |
| Gender (female)                                 | 1393 (60.70)                          | 4280 (64.00)                             | 4590 (60.88)                            | 13634 (60.30)                        | 3248 (59.85)                              | 27145 (60.92)                             | <0.001 |
| Age (years), mean (SD)                          | 35.98 (14.25)                         | 46.41 (18.35)                            | 43.39 (18.60)                           | 43.08 (17.93)                        | 42.98 (17.63)                             | 43.25 (18.02)                             | <0.001 |
| Urban setting                                   | 0 (0.00)                              | 6688 (100.00)                            | 3384 (44.88)                            | 14242 (62.99)                        | 3894 (71.75)                              | 28208 (63.30)                             | <0.001 |
| Educational level, mean<br>number of years (SD) | 5.43 (3.60)                           | 9.19 (4.00)                              | 9.31 (5.49)                             | 7.41 (4.98)                          | 8.77 (5.27)                               | 8.06 (5.02)                               | <0.001 |
| Health coverage *                               |                                       |                                          |                                         |                                      |                                           |                                           |        |
| Total                                           | 2295 (100.00)                         | 6527 (97.60)                             | 5453 (72.32)                            | 17114 (75.70)                        | 5427 (100.00)                             | 36816 (82.62)                             |        |
| Full                                            | 29 (1.26)                             | 1920 (28.71)                             | 3148 (41.75)                            | 2877 (12.72)                         | 0 (0.00)                                  | 7974 (17.89)                              | <0.001 |
| Partial                                         | 2053 (89.46)                          | 4465 (66.76)                             | 405 (5.37)                              | 13674 (60.48)                        | 5158 (95.04)                              | 25755 (57.80)                             | <0.001 |
| Private                                         | 183 (7.97)                            | 39 (0.58)                                | 1482 (19.66)                            | 563 (2.49)                           | 269 (4.96)                                | 2536 (5.69)                               | <0.001 |
| Other**                                         | 30 (1.31)                             | 103 (1.54)                               | 418 (5.54)                              | 0 (0.00)                             | 0 (0.00)                                  | 551 (1.24)                                | <0.001 |
| Joint biomechanical stress ***                  |                                       |                                          |                                         |                                      |                                           |                                           |        |
| Totals                                          | 1698 (74.00)                          | 6686 (99.97)                             | 7440 (98.67)                            | 20253 (89.58)                        | 3206 (59.08)                              | 39283 (88.16)                             |        |
| High                                            | 420 (18.30)                           | 3511 (52.50)                             | 3382 (44.85)                            | 6667 (29.49)                         | 1219 (22.46)                              | 15199 (34.11)                             | <0.001 |
| Medium                                          | 159 (6.93)                            | 1569 (23.46)                             | 516 (6.84)                              | 3438 (15.21)                         | 576 (10.61)                               | 6258 (14.04)                              | <0.001 |
| Low                                             | 120 (5.23)                            | 1604 (23.98)                             | 3510 (46.55)                            | 6684 (29.56)                         | 1309 (24.12)                              | 13227 (29.68)                             | <0.001 |
| Unspecified                                     | 999 (43.53)                           | 2 (0.03)                                 | 32 (0.42)                               | 3464 (15.32)                         | 102 (1.88)                                | 4599 (10.32)                              | <0.001 |
| Rheumatic disease                               |                                       |                                          |                                         |                                      |                                           |                                           |        |
| Totals                                          | 705 (30.72)                           | 2726 (40.76)                             | 3596 (47.69)                            | 5092 (22.52)                         | 1409 (25.96)                              | 13528 (30.36)                             | <0.001 |
| Osteoarthritis                                  | 88 (3.83)                             | 521 (7.79)                               | 470 (6.23)                              | 1797 (7.95)                          | 814 (15.00)                               | 3690 (8.28)                               | <0.001 |
| Rheumatoid arthritis                            | 69 (3.01)                             | 84 (1.26)                                | 120 (1.59)                              | 501 (2.22)                           | 103 (1.90)                                | 877 (1.97)                                | <0.001 |
| Back pain                                       | 460 (20.04)                           | 237 (3.54)                               | 474 (6.29)                              | 1357 (6.00)                          | 301 (5.55)                                | 2829 (6.35)                               | <0.001 |
| RRPS                                            | 41 (1.79)                             | 2726 (40.76)                             | 2671 (35.42)                            | 461 (2.04)                           | 201 (3.70)                                | 6100 (13.69)                              | <0.001 |
| Musculoskeletal<br>disorders                    | 50 (2.18)                             | 0 (0.00)                                 | 62 (0.82)                               | 1013 (4.48)                          | 60 (1.11)                                 | 1185 (2.66)                               | <0.001 |
| Fibromyalgia                                    | 3 (0.13)                              | 27 (0.40)                                | 214 (2.84)                              | 126 (0.56)                           | 23 (0.42)                                 | 393 (0.88)                                | <0.001 |
| Other ****                                      | 2 (0.09)                              | 26 (0.39)                                | 32 (0.42)                               | 80 (0.35)                            | 23 (0.42)                                 | 163 (0.37)                                | 0.179  |
| Pain                                            |                                       |                                          |                                         |                                      |                                           |                                           |        |
| Historical pain                                 | 938 (40.87)                           | 4946 (73.95)                             | 3420 (45.36)                            | 6141 (27.16)                         | 1743 (32.12)                              | 17188 (38.57)                             | <0.001 |
| Non-traumatic pain (7<br>days)                  | 402 (17.52)                           | 2939 (43.94)                             | 1525 (20.23)                            | 4204 (18.59)                         | 1212 (22.33)                              | 10282 (23.07)                             | <0.001 |

| Physical disability (Health Assessment Questionnaire-Disability Index (HAQ-DI)) |             |              |              |               |              |               |        |
|---------------------------------------------------------------------------------|-------------|--------------|--------------|---------------|--------------|---------------|--------|
| HAQ $\geq$ 0.8                                                                  | 95 (4.14)   | 400 (5.98)   | 656 (8.70)   | 1741 (7.70)   | 427 (7.87)   | 3319 (7.45)   | <0.001 |
| Comorbidities                                                                   |             |              |              |               |              |               |        |
| Diabetes mellitus                                                               | 125 (5.45)  | 428 (6.40)   | 382 (5.07)   | 1898 (8.39)   | 260 (4.79)   | 3093 (6.94)   | <0.001 |
| High blood pressure                                                             | 379 (16.51) | 1591 (23.79) | 1046 (13.87) | 3078 (13.61)  | 1168 (21.52) | 7262 (16.30)  | <0.001 |
| Cardiovascular disease                                                          | 144 (6.27)  | 435 (6.50)   | 250 (3.32)   | 471 (2.08)    | 221 (4.07)   | 1521 (3.41)   | <0.001 |
| Smoking                                                                         | 497 (21.66) | 2409 (36.02) | 1587 (21.05) | 1080 (4.78)   | 561 (10.34)  | 6134 (13.77)  | <0.001 |
| Alcoholism                                                                      | 379 (16.51) | 0 (0.00)     | 470 (6.23)   | 1523 (6.74)   | 447 (8.24)   | 2819 (6.33)   | <0.001 |
| Anxiety/depression                                                              | 123 (5.36)  | 1463 (21.88) | 1843 (24.44) | 2185 (9.66)   | 417 (7.68)   | 6031 (13.53)  | <0.001 |
| No comorbidities                                                                | 882 (38.43) | 2483 (37.13) | 2460 (32.63) | 12471 (55.16) | 2545 (46.90) | 20841 (46.77) | <0.001 |

320 \* Missing data: 7744 (17.38)

321 \*\*Other: Traditional healthcare

322 \*\*\* Missing data: 5277 (11.84)

323 \*\*\*\* Others: Ankylosing spondylitis, gout, scleroderma, psoriasis.

324

325

326 A logistic regression analysis was performed by ethnicity. In the Indigenous population, the  
 327 variables significantly associated with RMD diagnosis were living in a rural setting, younger  
 328 age, relying on the public health system for treatment, high levels of joint biomechanical  
 329 stress, greater pain and greater disability. In turn, the variables associated with RMD  
 330 diagnosis in the non-Indigenous population were being a woman, living in an urban setting,  
 331 older age, relying on the private sector for treatment, more frequent joint biomechanical stress  
 332 regardless of the level, greater pain, greater disability and less association with having  
 333 diabetes mellitus (Table 3).

334

335

336

337 Table 3. Logistic regression. Dependent variable: a rheumatic disease. Independent variables:  
 338 gender, place of residence, age, schooling, health coverage, biomechanical stress, pain, functional  
 339 capacity, and comorbidities.

|                 | Indigenous            |        | Non-Indigenous        |        |
|-----------------|-----------------------|--------|-----------------------|--------|
|                 | OR (95% CI two-sided) | P      | OR (95% CI two-sided) | P      |
| Intercept       | 0.02 (0.01 - 0.03)    | < 0.01 | 0.10 (0.08 - 0.12)    | < 0.01 |
| Gender (female) | 1.10 (0.96 - 1.25)    | 0.164  | 1.19 (1.11 - 1.27)    | < 0.01 |



|                                                                                 |                       |        |                    |        |
|---------------------------------------------------------------------------------|-----------------------|--------|--------------------|--------|
| Age (years)                                                                     | 0.49 (0.41 - 0.59)    | < 0.01 | 1.49 (1.37 - 1.62) | < 0.01 |
| Urban setting                                                                   | 1.02 (1.02 - 1.02)    | < 0.01 | 1.00 (1.00 - 1.01) | < 0.01 |
| Educational level                                                               | 0.99 (0.97 - 1.00)    | 0.051  | 1.01 (1.00 - 1.01) | 0.081  |
| Health coverage                                                                 |                       |        |                    |        |
| Full                                                                            | 1.46 (1.11 - 1.91)    | < 0.01 | 0.82 (0.74 - 0.91) | < 0.01 |
| Partial                                                                         | 1.15 (0.88 - 1.50)    | 0.322  | 0.59 (0.55 - 0.64) | < 0.01 |
| Private                                                                         | 1.55 (1.10 - 2.19)    | 0.013  | 1.43 (1.25 - 1.64) | < 0.01 |
| Other                                                                           | 1.36 (0.87 - 2.13)    | 0.172  | 0.98 (0.70 - 1.36) | 0.900  |
| Level of joint biomechanical stress                                             |                       |        |                    |        |
| High                                                                            | 1.18 (1.00 - 1.40)    | 0.054  | 1.55 (1.41 - 1.69) | < 0.01 |
| Medium                                                                          | 1.22 (0.96 - 1.56)    | 0.110  | 1.31 (1.17 - 1.46) | < 0.01 |
| Low                                                                             | 1.17 (0.97 - 1.42)    | 0.101  | 1.52 (1.38 - 1.66) | < 0.01 |
| Pain                                                                            |                       |        |                    |        |
| Historical pain                                                                 | 27.77 (24.09 - 32.01) | < 0.01 | 3.84 (3.59 - 4.11) | < 0.01 |
| Non-traumatic pain (7 days)                                                     | 2.51 (2.18 - 2.89)    | < 0.01 | 2.26 (2.11 - 2.43) | < 0.01 |
| Physical disability (Health Assessment Questionnaire-Disability Index (HAQ-DI)) |                       |        |                    |        |
| HAQ $\geq$ 0.8                                                                  | 1.25 (1.00 - 1.56)    | 0.045  | 1.37 (1.23 - 1.52) | < 0.01 |
| Comorbidities                                                                   |                       |        |                    |        |
| Diabetes mellitus                                                               | 0.95 (0.75 - 1.20)    | 0.653  | 0.82 (0.73 - 0.93) | < 0.01 |
| High blood pressure                                                             | 0.98 (0.82 - 1.18)    | 0.842  | 0.95 (0.87 - 1.03) | 0.226  |
| Cardiovascular disease                                                          | 0.83 (0.62 - 1.12)    | 0.219  | 1.06 (0.91 - 1.24) | 0.433  |
| Smoking                                                                         | 0.93 (0.74 - 1.16)    | 0.504  | 1.06 (0.97 - 1.16) | 0.217  |
| Alcoholism                                                                      | 0.78 (0.64 - 0.94)    | < 0.01 | 1.15 (0.97 - 1.37) | 0.107  |
| Anxiety/depression                                                              | 0.99 (0.84 - 1.17)    | 0.926  | 1.05 (0.96 - 1.16) | 0.266  |
| No comorbidities                                                                | 0.87 (0.74 - 1.03)    | 0.111  | 0.73 (0.67 - 0.80) | < 0.01 |

340

341

342

343 Twenty clusters were identified in the Indigenous population and seventeen in the non-  
 344 Indigenous population. In order to best represent the results, six clusters were selected for  
 345 each group, using consensus and weighing as described in the methodology.

346 The six clusters selected from the Indigenous population were: Cluster 1 was represented by  
 347 individuals with partial coverage, younger, with lower educational attainment, higher  
 348 prevalence of RA and low back pain, and higher pain and smoking. Cluster 11 included

1  
2  
3 349 individuals with full coverage, greater functional limitation, and higher prevalence of RA  
4  
5 350 and anxiety/depression. Cluster 13 was represented by individuals with less schooling and a  
6  
7 351 high percentage of smoking and alcoholism. Cluster 14 was represented by individuals with  
8  
9 352 full coverage, high prevalence of RMD, and higher percentage of anxiety/depression and  
10  
11 353 pain. Cluster 15 was the largest, with partial coverage, high level of joint biomechanical  
12  
13 354 stress, and higher prevalence of RMD and associated pain. Lastly, Cluster 16 was the smallest  
14  
15 355 and included individuals with private coverage, high level of joint biomechanical stress, older  
16  
17 356 age, anxiety/depression and alcoholism, and the highest prevalence of RMD and associated  
18  
19 357 pain out of all the clusters (Figure 1).

20  
21  
22  
23  
24 358 In the non-Indigenous population, the six selected clusters were: Cluster 4 was the largest,  
25  
26 359 represented by individuals with partial coverage, high level of joint biomechanical stress,  
27  
28 360 higher percentage of pain, and higher prevalence of RMD, high blood pressure and  
29  
30 361 anxiety/depression. Cluster 7 was the smallest, with a low percentage of pain and RMD, but  
31  
32 362 greater physical disability. Cluster 8 included individuals with less years of formal  
33  
34 363 schooling, partial health coverage, higher prevalence of RMD and anxiety/depression,  
35  
36 364 medium level of joint biomechanical stress, and high physical disability.

37  
38  
39  
40  
41 365 Cluster 9 included individuals with higher educational attainment, full coverage, higher  
42  
43 366 prevalence of RRPS, greater pain, greater level of smoking and less disability. Cluster 10  
44  
45 367 was represented by individuals with partial coverage, and lower prevalence of RMD and  
46  
47 368 associated pain, but with greater limitation. Cluster 17 included only Mexican individuals  
48  
49 369 with partial coverage, high level of joint biomechanical stress, lower educational attainment,  
50  
51 370 and higher prevalence of RA, diabetes mellitus and high blood pressure (Figure 2).

## 52 53 54 55 371 **DISCUSSION**

1  
2  
3 372 The syndemic approach analyzes the synergistic interrelationship between different  
4  
5 373 biological and non-biological factors that lead to disease. The application of this approach to  
6  
7 374 the area of health is relatively recent. Multiple studies describe how epidemiological and  
8  
9 375 socioeconomic factors are related to disability and inequity in patients with RMD [40].  
10  
11 376 However, there are few publications that evaluate inflammatory joint diseases and other  
12  
13 377 chronic musculoskeletal conditions from a broader social and biocultural context, taking into  
14  
15 378 consideration how the socioeconomic characteristics of the environment interact with the  
16  
17 379 disease.

18  
19  
20  
21  
22 380 In the present study, a syndemic approach was used to identify factors associated with health  
23  
24 381 inequity [41]. The results obtained through a complex analysis of networks showed a greater  
25  
26 382 clustering of patients with rheumatic diseases who shared common social determinants, such  
27  
28 383 as rural setting and lower schooling. This coincides with the results published by Norton et  
29  
30 384 al, who have described that the greater the comorbidities, the greater the risk of a negative  
31  
32 385 impact on the evolution of RMD [42] and, consequently, the greater the difficulty to  
33  
34 386 adequately control the disease [43].

35  
36  
37  
38  
39 387 This study identified factors associated with inequity in individuals with RMD in five Latin  
40  
41 388 American countries with a syndemic approach. The clusters obtained through our analysis  
42  
43 389 show differential negative impacts in the groups that were formed. The relevant emerging  
44  
45 390 factors are living in rural communities, having lower educational attainment, and depending  
46  
47 391 on the public healthcare system, described as fragmented in all participating countries.  
48  
49 392 Comorbidities such as smoking, alcoholism and those related to mental health  
50  
51 393 (anxiety/depression) are most prevalent overall, and greater in the Indigenous population.  
52  
53 394 The differences detected through the clusters can be considered health inequities, since they  
54  
55  
56  
57  
58  
59  
60

1  
2  
3 395 constitute avoidable differences such as low schooling and a health care system without full  
4  
5 396 coverage. Furthermore, the clusters that have greater impact are those which include  
6  
7 397 Indigenous people. All of the above attests to the inequity in RMD in low- and middle-  
8  
9  
10 398 income countries in general, and even more so in historically vulnerable populations, such as  
11  
12 399 Indigenous groups.

13  
14  
15 400 Multiple reports describe disparity and inequity among patients with RMD. Though they  
16  
17 401 contemplate the interaction of disease with epidemiological, biological and socioeconomic  
18  
19 402 factors, most of the research of this phenomenon does not include a conjunct and  
20  
21  
22 403 comprehensive analysis of all factors as is achieved by syndemics [40].  
23  
24

25 404 Another important finding of the study is the clusters with higher prevalence of  
26  
27 405 comorbidities, particularly high blood pressure, tobacco, and alcohol consumption, and those  
28  
29 406 related to mental health (anxiety/depression). As previously reported, the greater the  
30  
31 407 comorbidity, the greater the risk of negative impact on the evolution of RMD [42]. The  
32  
33 408 coexistence of two or more conditions prevents the proper control of disease activity,  
34  
35 409 hindering the achievement of therapeutic goals like those proposed by the treat to target  
36  
37 410 recommendations [43].  
38  
39  
40

41  
42 411 The coexistence of several chronic conditions involving systemic inflammatory processes  
43  
44 412 and deterioration in functional capacities, leads to a greater impact on the quality of life and  
45  
46 413 greater demand of health services, to which many populations in Latin America have no  
47  
48 414 universal access. Indeed, the results of this analysis identified several clusters with partial or  
49  
50 415 no access to medical care coinciding with greater comorbidity (cluster 1, 10,11). The  
51  
52 416 association between RMD severity and comorbidities as biological interactions is clear, but  
53  
54  
55 417 it is important to correlate these at a social level, since not having access to timely diagnoses  
56  
57  
58  
59  
60

1  
2  
3 418 or specialized care increases the possibility of greater comorbidity and complications.  
4  
5 419 Additionally, it is important to address the interaction of certain prevalent comorbidities  
6  
7 420 (smoking, alcoholism, and mental health struggles) which contribute to the syndemic as both  
8  
9 421 social and biological factors. While there is sufficient evidence to suggest the possibility of  
10  
11 422 common pathophysiological mechanisms with inflammatory joint diseases, it has also been  
12  
13 423 shown that states of anxiety and depression can be triggered by non-biological factors such  
14  
15 424 as social isolation, poverty, mental health worldview or cultural stigmatization, and/or lack  
16  
17 425 of access to healthcare [44].  
18  
19  
20  
21

22 426 When comparing inequity between population groups, the poverty rate in Indigenous and  
23  
24 427 rural communities is higher, as reported in this study: 29.78% of the population self-identified  
25  
26 428 as Indigenous, with a higher level of individuals from rural areas and fewer years of  
27  
28 429 schooling. The prevalence of RA specifically was more pronounced in the Indigenous  
29  
30 430 population, with the highest rates in Argentina and Mexico (3.01% and 2.22%) [8,10].  
31  
32 431 Previous research has similarly found that RMD are more frequent in the Indigenous  
33  
34 432 populations than in the non-Indigenous populations of Canada, Australia, New Zealand and  
35  
36 433 the United States [17].  
37  
38  
39  
40

41 434 The Indigenous population had a lower prevalence of disability despite presenting greater  
42  
43 435 high level of joint biomechanical stress, historical pain and RA, which may be related to a  
44  
45 436 worldview favoring normalization or underestimation of symptoms. In addition, the  
46  
47 437 interpretation of these symptoms may be one of the causes of delay in seeking specialized  
48  
49 438 care [11]. The relationship between ethnicity and health outcomes seems to be influenced by  
50  
51 439 acculturation; that is, when one ethnic group is forced to adopt the beliefs and practices of  
52  
53 440 another, the members develop negative health behaviors as coping mechanisms [45].  
54  
55  
56  
57  
58  
59

1  
2  
3 441 Health systems in Latin America are diverse and complex. Individuals in this study are  
4  
5 442 distributed among the spectrum of public (partial or full) and private systems. Most  
6  
7 443 Indigenous communities have public health coverage, though this does not guarantee access  
8  
9 444 or continuity of care and treatment. Limited access is not merely due to economic barriers,  
10  
11 445 but also related to ethnic, cultural and geographical factors, among others [8,24,40,46].  
12  
13 446 Indigenous communities are among the most vulnerable groups and, due to the conditions  
14  
15 447 described above, their inclusion into the healthcare system is complex [11,46,47].  
16  
17  
18  
19

20 448 The inaccessibility of the healthcare system, socioeconomic conditions, presence of  
21  
22 449 comorbidities involving mental health, and RMD disease activity, are all factors that exist in  
23  
24 450 interacting layers to create specific conditions of vulnerability for different patient  
25  
26 451 populations. A model of vulnerability in layers, called a palimpsest design [12], analyzes  
27  
28 452 how the determinants of health at different levels—genetic, biological, psychological, social  
29  
30 453 and political—interact over time, creating barriers that lead to health inequity. The syndemic  
31  
32 454 approach, in taking into consideration all factors and their interactions conjunctly,  
33  
34 455 corresponds with a palimpsest model, providing evidence for the vulnerability of RMD  
35  
36 456 patients associated with social factors such as rurality, low educational attainment, and  
37  
38 457 greater reliance on the public health system (Figure 3).  
39  
40  
41  
42

### 43 458 **Limitations**

44  
45  
46 459 The cross-sectional nature of our study is a limitation to establish causality. However, the  
47  
48 460 network and cluster analysis allowed the grouping of individuals by variables to document  
49  
50 461 inequity, the principal objective of this study.  
51  
52  
53  
54  
55  
56  
57  
58  
59  
60

1  
2  
3 462 Another limitation is the documentation of comorbidities through self-reporting, which can  
4  
5 463 condition a measurement error. However, an attempt was made to verify these reports  
6  
7 464 through the medications that individuals informed having taken.  
8  
9

10  
11 465

12  
13 466 In conclusion, the complex analysis from a syndemic approach allowed us to identify the  
14  
15 467 greatest inequity in the clusters that group younger individuals, residents of rural areas, those  
16  
17 468 who self-identify as Indigenous, have lower educational attainment, higher prevalence of  
18  
19 469 RMD and RA specifically, greater comorbidities especially related to mental health and high  
20  
21 470 blood pressure, and partial coverage in the public healthcare system. Given the above we can  
22  
23 471 assume that these social vulnerabilities and comorbidities lead to health inequities for  
24  
25 472 populations living in countries in which RMD are not considered a priority, resulting in lack  
26  
27 473 of coverage for prevention, diagnosis and management.  
28  
29  
30  
31

32  
33 474

### 34 35 475 **Acknowledgments**

36  
37  
38 476 We thank all the participating communities and their authorities for allowing this study  
39  
40 477 to be conducted. We also thank all primary care physicians who collaborated in the study.  
41  
42 478 Amaranta Manrique de Lara for her critical reading, comments and editing.  
43  
44  
45

46 479 We also thank all the researchers:

47 480 **Argentina:** Mario Goñi, Nora Mathern, Marisa Jorfen, Silvana Conti, Romina Nieto, Alvaro  
48 481 Sanabria, Cristina Prigione, Adriana M. R. Silvestre, Vanina García, Julio Miljevic, Daniel  
49 482 Dhair, Matias Laithe, Fadua Midauar, Maria Celeste Martin, Maria Cecilia Barrios, Vicente,  
50 483 María Elena Crespo, Mariana Aciar, Emilio Buschiazso, Natalia L Cucchiario, Eugenia Picco,  
51 484 Mario Ruiz , José Adolfo Sánchez, Rodolfo Franco, Natalia Estrella, Silvia Jorge, Cinthya  
52 485 Retamozo, Sofia Fernandez, Martina Fay, Cecilia Camacho, Graciela Gomez, Jazmin  
53 486 Petrelli, Andrés Honeri, Viviana Arenas Solórzano, Ana Bensi, Maria Elena Calvo, Marcela  
54 487 Valdata.  
55  
56  
57  
58  
59  
60

1  
2  
3 488 **Colombia:** Rodrigo Giraldo, Ignacio Angarita, Jesus G. Ballesteros, Sofia Arias, Andres  
4 489 Vásquez, Lina Valero, Ani Cortes, Estafania Castañeda, Elias Forero.

6 490 **Ecuador:** Astrid Feicán, Fernando Vintimilla, Jaime Vintimilla, Veronica Ochoa, Jorge  
7 491 Delgado, Angelita Lliguisaca, Holger Dután.

9 492 **México:** Mario H. Cardiel, Jacqueline Rodríguez-Amado, Julio Casasola-Vargas, Conrado  
10 493 Garcia, Imelda García-Olivera, Natalia Santana, César Pacheco, Susana Aidee Gonzalez-  
11 494 Chávez, Hazel Garcia Morales, Arturo Velasco Gutierrez, JF Moctezuma-Rios, Everardo  
12 495 Álvarez-Hernández, Eduardo Navarro-Zarza, Angelia Angulo, Rosana Flores, Janeth Galván  
13 496 Padrón, Lorena Pérez B, Janett Riega Brenda Vaquez Fuentes, Miguel A  
14 497 Villarreal, Cassandra Skinner Taylor, Sara Marín, Dionicio Galarza Delgado, Diana Flores  
15 498 Alvarado, Jorge A. Esquivel Varerio, Luz Helena Sanín, Marco Maradiaga Ceceño, Jorge  
16 499 Zamudio Lerm.

18  
19 500 **Venezuela:** Ysabel Granados, Rosa Chacón, Ivan Stekman, Yanira Martínez, Gloris  
20 501 Sánchez, Celenia Rosillo, Ligia Cedeño.

21  
22 502

23  
24 503 **Contributors:** YG, AG-S, J A-N, RQ, FJ-S, AMS, SG, A L-S, MVG-R, VJ, M G-E, JC R, R  
25 504 B-V, JL, BA P-E, I P-B were involved in study conception, design, acquisition of data and  
26 505 drafting the manuscript. YG, AG-S, J A-N, RQ, FJ-S, AMS, SG, A L-S, MVG-R, VJ, M G-  
27 506 E and I P-B contributions to analysis and interpretation of data. YG and I P-B drafted the  
28 507 manuscript. All authors have read and approved the final version of the manuscript.  
29 508 Alfonso Gastelum-Strozzi develop all statistical analysis and modeling. IPB is the author  
30 509 acting as the guarantor for this study

31  
32  
33 510 .

34  
35 511 **Data sharing.** The data are available but must be requested from the  
36 512 researcher IPB through a specific application request for the use of data, which will be  
37 513 evaluated by all Group.

38  
39 514 **Transparency declaration.** The lead author (the manuscript's guarantor) affirms that the  
40 515 manuscript is an honest, accurate, and transparent account of the study being reported; that  
41 516 no important aspects of the study have been omitted; and that any discrepancies from the  
42 517 study as planned (and, if relevant, registered) have been explained.

#### 43 44 518 **Request Permissions**

45  
46  
47 519 If you wish to reuse any or all of this article please use the link below which will take you  
48 520 to the Copyright Clearance Center's RightsLink service. You will be able to get a quick  
49 521 price and instant permission to reuse the content in many different ways

50  
51 522

#### 52 523 **Ethics approval**



1  
2  
3 524 As the present investigation involves data collected as a part of prior studies, no specific  
4 525 study protocol approval was needed, as all Institutional and Ethics Committees of each  
5 526 participating institution (Argentina:1619/2010 and 0127/2011; Ecuador: 2016-129IN, and  
6 527 Mexico: DI/11/4044B/3/123) had already approved pertinent studies and authorities from  
7 528 participating indigenous communities (18).  
8  
9 529

10  
11  
12 530 **Funding:** This work was supported by Federico Wilhelm Agricola Foundation, N/A.  
13 531 Argentina, Asociacion Colombiana de Reumatologia (ASOREUMA), No156. Colombia,  
14 532 Colegio Mexicano de Reumatología, N/A. México, National Council for Science and  
15 533 Technology (CONACYT)-Mexico. Salud 2011-01-162154, Mexico,PDVSA East and  
16 534 SUELOPETROL, N/A. Venezuela and Universidad de Cuenca, N/A. Ecuador.

17  
18 535 **Competing interests:** non-financial associations that may be relevant to the submitted  
19  
20 536 manuscript. Authors declare no competing interests.  
21  
22

23 537

24 538

## 25 26 27 539 **References**

28  
29  
30  
31 540 1 Bilsborrow JB, Peláez-Ballestas I, Pons-Estel B, *et al.* Global Rheumatology Research:  
32 541 Frontiers, Challenges, and Opportunities. *Arthritis Rheumatol Hoboken NJ* 2022;**74**:1–  
33 542 4. doi:10.1002/art.41980

34  
35 543 2 Cardiel MH. Present and future of rheumatic diseases in Latin America. Are we  
36 544 prepared to face them? *Reumatol Clin* 2011;**7**:279–80.  
37 545 doi:10.1016/j.reuma.2010.12.009

38  
39  
40 546 3 Brooks PM. The burden of musculoskeletal disease--a global perspective. *Clin*  
41 547 *Rheumatol* 2006;**25**:778–81. doi:10.1007/s10067-006-0240-3

42  
43 548 4 Briggs A, Slater H, Jordan J, *et al.* Towards a global strategy to improve  
44 549 musculoskeletal health. Sydney, Australia: : Global Alliance for Musculoskeletal Health  
45 550 2021.

46  
47  
48 551 5 Commission on Social Determinants of Health. Subsanan las desigualdades en una  
49 552 generación : alcanzar la equidad sanitaria actuando sobre los determinantes sociales  
50 553 de la salud : informe final de la Comisión Sobre Determinantes Sociales de la Salud.  
51 554 Organización Mundial de la Salud 2009.  
52 555 <https://apps.who.int/iris/handle/10665/44084> (accessed 3 Apr 2022).  
53  
54  
55  
56  
57  
58  
59  
60

- 1  
2  
3 556 6 OECD. *Health at a Glance 2021: OECD Indicators*. Paris: : Organisation for Economic  
4 557 Co-operation and Development 2021. <https://doi.org/10.1787/ae3016b9-en> (accessed  
5 558 3 Apr 2022).
- 7 559 7 Linares-Pérez N, Arellano OL. La equidad en salud: propuestas conceptuales, aspectos  
8 560 críticos y perspectivas desde el campo de la Salud Colectiva. *Med Soc* 2008;**3**:247–59.
- 11 561 8 Peláez-Ballestas I, Granados Y, Quintana R, *et al*. Epidemiology and socioeconomic  
12 562 impact of the rheumatic diseases on indigenous people: an invisible syndemic public  
13 563 health problem. *Ann Rheum Dis* 2018;**77**:1397–404. doi:10.1136/annrheumdis-2018-  
14 564 213625
- 17 565 9 Loyola-Sanchez A, Richardson J, Pelaez-Ballestas I, *et al*. The impact of arthritis on the  
18 566 physical function of a rural Maya-Yucateco community and factors associated with its  
19 567 prevalence: a cross sectional, community-based study. *Clin Rheumatol* 2016;**35 Suppl**  
20 568 **1**:25–34. doi:10.1007/s10067-015-3084-x
- 23 569 10 Quintana R, Goñi M, Mathern N, *et al*. Rheumatoid arthritis in the indigenous qom  
24 570 population of Rosario, Argentina: aggressive and disabling disease with inadequate  
25 571 adherence to treatment in a community-based cohort study. *Clin Rheumatol*  
26 572 2018;**37**:2323–30. doi:10.1007/s10067-018-4103-5
- 29 573 11 Quintana R, Fernández S, Orzuza SM, *et al*. «Living with rheumatoid arthritis» in an  
30 574 indigenous qom population in Argentina. A qualitative study. *Reumatol Clin*  
31 575 2021;**17**:543–8. doi:10.1016/j.reumae.2020.04.006
- 33 576 12 Colmenares-Roa T, Figueroa-Perea JG, Pelcastre-Villafuerte B, *et al*. Vulnerability as a  
34 577 palimpsest: Practices and public policy in a Mexican hospital setting. *Health Lond Engl*  
35 578 1997 2021;:1363459320988879. doi:10.1177/1363459320988879
- 38 579 13 Londoño J, Peláez Ballestas I, Cuervo F, *et al*. Prevalencia de la enfermedad reumática  
39 580 en Colombia, según estrategia COPCORD-Asociación Colombiana de Reumatología.  
40 581 Estudio de prevalencia de enfermedad reumática en población colombiana mayor de  
41 582 18 años. *Rev Colomb Reumatol* 2018;**25**:245–56. doi:10.1016/j.rcreu.2018.08.003
- 44 583 14 Dantés OG, Sesma S, Becerril VM, *et al*. Sistema de salud de México. *Salud Pública*  
45 584 *México* 2011;**53**:s220–32.
- 47 585 15 Soriano ER. Defining Quality of Rheumatologic Care: Argentina. *J Clin Rheumatol Pract*  
48 586 *Rep Rheum Musculoskelet Dis* 2017;**23**:207–8. doi:10.1097/RHU.0000000000000540
- 51 587 16 Pineda C, Sandoval H. Defining Quality of Rheumatologic Care: Mexico. *J Clin*  
52 588 *Rheumatol Pract Rep Rheum Musculoskelet Dis* 2017;**23**:209–11.  
53 589 doi:10.1097/RHU.0000000000000532

- 1  
2  
3 590 17 Montenegro RA, Stephens C. Indigenous health in Latin America and the Caribbean.  
4 591 *Lancet Lond Engl* 2006;**367**:1859–69. doi:10.1016/S0140-6736(06)68808-9  
5  
6  
7 592 18 Peláez-Ballestas I, Granados Y, Silvestre A, *et al.* Culture-sensitive adaptation and  
8 593 validation of the community-oriented program for the control of rheumatic diseases  
9 594 methodology for rheumatic disease in Latin American indigenous populations.  
10 595 *Rheumatol Int* 2014;**34**:1299–309. doi:10.1007/s00296-014-2997-z  
11  
12 596 19 Quintana R, Juárez V, Silvestre A, *et al.* Prevalencia de Artritis Reumatoide en dos  
13 597 poblaciones originarias de Argentina. Estudio de base comunitaria: ¿“Dos caras de una  
14 598 misma moneda”? *Rev Fac Cienc Médicas Univ Nac Rosario Vol 1* 2020 113-121  
15 599 Published Online First: 16 June  
16 600 2021.<http://rephip.unr.edu.ar/xmlui/handle/2133/20993> (accessed 3 Apr 2022).  
17  
18  
19 601 20 Peláez-Ballestas I, Pons-Estel BA, Burgos-Vargas R. Epidemiology of rheumatic diseases  
20 602 in indigenous populations in Latin-Americans. *Clin Rheumatol* 2016;**35 Suppl 1**:1–3.  
21 603 doi:10.1007/s10067-016-3298-6  
22  
23  
24 604 21 Singer M, Bulled N, Ostrach B, *et al.* Syndemics and the biosocial conception of health.  
25 605 *Lancet Lond Engl* 2017;**389**:941–50. doi:10.1016/S0140-6736(17)30003-X  
26  
27  
28 606 22 Mendenhall E, Kohrt BA, Norris SA, *et al.* Non-communicable disease syndemics:  
29 607 poverty, depression, and diabetes among low-income populations. *Lancet Lond Engl*  
30 608 2017;**389**:951–63. doi:10.1016/S0140-6736(17)30402-6  
31  
32  
33 609 23 Willen SS, Knipper M, Abadía-Barrero CE, *et al.* Syndemic vulnerability and the right to  
34 610 health. *Lancet Lond Engl* 2017;**389**:964–77. doi:10.1016/S0140-6736(17)30261-1  
35  
36 611 24 Strozzi AG, Peláez-Ballestas I, Granados Y, *et al.* Syndemic and syndemogenesis of low  
37 612 back pain in Latin-American population: a network and cluster analysis. *Clin*  
38 613 *Rheumatol* 2020;**39**:2715–26. doi:10.1007/s10067-020-05047-x  
39  
40  
41 614 25 Juárez V, Quintana R, Crespo ME, *et al.* Prevalence of musculoskeletal disorders and  
42 615 rheumatic diseases in an Argentinean indigenous Wichi community. *Clin Rheumatol*  
43 616 2021;**40**:75–83. doi:10.1007/s10067-020-05130-3  
44  
45 617 26 Guevara SV, Feicán EA, Peláez I, *et al.* Prevalence of Rheumatic Diseases and Quality of  
46 618 Life in the Saraguro Indigenous People, Ecuador: A Cross-sectional Community-Based  
47 619 Study. *J Clin Rheumatol Pract Rep Rheum Musculoskelet Dis* 2020;**26**:S139–47.  
48 620 doi:10.1097/RHU.0000000000001131  
49  
50  
51 621 27 Granados Y, Rosillo C, Cedeño L, *et al.* Prevalence of musculoskeletal disorders and  
52 622 rheumatic disease in the Warao, Kari’ña, and Chaima indigenous populations of  
53 623 Monagas State, Venezuela. *Clin Rheumatol* 2016;**35 Suppl 1**:53–61.  
54 624 doi:10.1007/s10067-016-3194-0  
55  
56  
57  
58  
59  
60

- 1  
2  
3 625 28 Ballestas IP, Santos AM, Angarita I, *et al.* Adecuación y validación transcultural del  
4 626 cuestionario COPCORD: Programa Orientado a la Comunidad para el Control de las  
5 627 Enfermedades Reumáticas en Colombia. *Rev Colomb Reumatol* 2019;**26**:88–96.  
6 628 doi:10.1016/j.rcreu.2019.01.004
- 7  
8  
9 629 29 Guevara-Pacheco S, Feicán-Alvarado A, Sanín LH, *et al.* Prevalence of musculoskeletal  
10 630 disorders and rheumatic diseases in Cuenca, Ecuador: a WHO-ILAR COPCORD study.  
11 631 *Rheumatol Int* 2016;**36**:1195–204. doi:10.1007/s00296-016-3446-y
- 12  
13  
14 632 30 Alvarez-Nemegyei J, Peláez-Ballestas I, Rodríguez-Amado J, *et al.* Prevalence of  
15 633 rheumatic regional pain syndromes in adults from Mexico: a community survey using  
16 634 COPCORD for screening and syndrome-specific diagnostic criteria. *J Rheumatol Suppl*  
17 635 2011;**86**:15–20. doi:10.3899/jrheum.100953
- 18  
19  
20 636 31 Granados Y, Cedeño L, Rosillo C, *et al.* Prevalence of musculoskeletal disorders and  
21 637 rheumatic diseases in an urban community in Monagas State, Venezuela: a COPCORD  
22 638 study. *Clin Rheumatol* 2015;**34**:871–7. doi:10.1007/s10067-014-2689-9
- 23  
24 639 32 Darmawan J. Recommendations from the Community Oriented Program for Control of  
25 640 Rheumatic Disease for data collection for the measurement and monitoring of health  
26 641 in developing countries. *Clin Rheumatol* 2007;**26**:853–7. doi:10.1007/s10067-007-  
27 642 0553-x
- 28  
29  
30 643 33 Muirden KD. Community Oriented Program for the Control of Rheumatic Diseases:  
31 644 studies of rheumatic diseases in the developing world. *Curr Opin Rheumatol*  
32 645 2005;**17**:153–6. doi:10.1097/01.bor.0000151402.11028.53
- 33  
34  
35 646 34 Bruce B, Fries JF. The Health Assessment Questionnaire (HAQ). *Clin Exp Rheumatol*  
36 647 2005;**23**:S14-18.
- 37  
38 648 35 Chiesi AM. Network Analysis. In: Smelser NJ, Baltes PB, eds. *International Encyclopedia*  
39 649 *of the Social & Behavioral Sciences*. Oxford, UK: : Pergamon 2001. 10499–502.  
40 650 doi:10.1016/B0-08-043076-7/04211-X
- 41  
42  
43 651 36 Singhal A. Modern Information Retrieval: A Brief Overview. *IEEE Data Eng Bull*  
44 652 2001;**24**:35–43.
- 45  
46 653 37 Han J, Kamber M, Pei J. 2 - Getting to Know Your Data. In: Han J, Kamber M, Pei J, eds.  
47 654 *Data Mining (Third Edition)*. Boston: : Morgan Kaufmann 2012. 39–82.  
48 655 doi:10.1016/B978-0-12-381479-1.00002-2
- 49  
50  
51 656 38 Bastian M, Heymann S, Jacomy M. Gephi: An Open Source Software for Exploring and  
52 657 Manipulating Networks. ICWSM 2009.
- 53  
54 658 39 Ester M, Kriegel H-P, Sander J, *et al.* A density-based algorithm for discovering clusters  
55 659 in large spatial databases with noise. In: *Proceedings of the Second International*

- 1  
2  
3 660 *Conference on Knowledge Discovery and Data Mining*. Portland, Oregon: : AAAI Press  
4 661 1996. 226–31.
- 6  
7 662 40 Yip K, Navarro-Millán I. Racial, ethnic, and healthcare disparities in rheumatoid  
8 663 arthritis. *Curr Opin Rheumatol* 2021;**33**:117–21. doi:10.1097/BOR.0000000000000782
- 9  
10 664 41 Caribe CE para AL y el. *Panorama Social de América Latina 2020*. CEPAL 2021.  
11 665 <https://www.cepal.org/es/publicaciones/46687-panorama-social-america-latina-2020>  
12 666 (accessed 3 Apr 2022).
- 14  
15 667 42 Norton S, Koduri G, Nikiphorou E, *et al*. A study of baseline prevalence and cumulative  
16 668 incidence of comorbidity and extra-articular manifestations in RA and their impact on  
17 669 outcome. *Rheumatol Oxf Engl* 2013;**52**:99–110. doi:10.1093/rheumatology/kes262
- 19  
20 670 43 Radner H, Yoshida K, Frits M, *et al*. The impact of multimorbidity status on treatment  
21 671 response in rheumatoid arthritis patients initiating disease-modifying anti-rheumatic  
22 672 drugs. *Rheumatol Oxf Engl* 2015;**54**:2076–84. doi:10.1093/rheumatology/kev239
- 24  
25 673 44 Nerurkar L, Siebert S, McInnes IB, *et al*. Rheumatoid arthritis and depression: an  
26 674 inflammatory perspective. *Lancet Psychiatry* 2019;**6**:164–73. doi:10.1016/S2215-  
27 675 0366(18)30255-4
- 28  
29 676 45 Ford ME, Kelly PA. Conceptualizing and categorizing race and ethnicity in health  
30 677 services research. *Health Serv Res* 2005;**40**:1658–75. doi:10.1111/j.1475-  
31 678 6773.2005.00449.x
- 33  
34 679 46 Massardo L, Pons-Estel BA, Wojdyla D, *et al*. Early rheumatoid arthritis in Latin  
35 680 America: low socioeconomic status related to high disease activity at baseline.  
36 681 *Arthritis Care Res* 2012;**64**:1135–43. doi:10.1002/acr.21680
- 38  
39 682 47 Gibson O, Lisy K, Davy C, *et al*. Enablers and barriers to the implementation of primary  
40 683 health care interventions for Indigenous people with chronic diseases: a systematic  
41 684 review. *Implement Sci IS* 2015;**10**:71. doi:10.1186/s13012-015-0261-x

685

686

687

688 **Figure Legend**

1  
2  
3 689 Figure 1. Network and cluster analysis to describe groups with shared variables according to  
4  
5 690 the syndemic framework in the Indigenous population. (Title)

6  
7  
8 691 RRPS: Rheumatic regional pain syndromes. Health Assessment Questionnaire-Disability  
9 692 Index (HAQ-DI) cut-off point of greater than 0.8.

10  
11 693 \* Age and formal schooling show mean value (standard deviation)

12 694 \*\*Circle size represents the number of individuals per cluster for visual comparison. The  
13 695 cluster positions are the result of the network simulation; the position of each cluster is  
14 696 obtained during the simulation depending on the similarity of the individuals.

15  
16 697

17  
18  
19 698 Figure 2. Network and cluster analysis to describe groups with shared variables according to  
20  
21 699 the syndemic framework in the non-Indigenous population. (Title).

22  
23  
24 700 RRPS: Rheumatic regional pain syndromes. Health Assessment Questionnaire-Disability  
25 701 Index (HAQ-DI) cut-off point of greater than 0.8.

26  
27 702 \* Age and formal schooling show mean value (standard deviation)

28 703 \*\*Circle size represents the number of individuals per cluster for visual comparison. The  
29 704 cluster positions are the result of the network simulation; the position of each cluster is  
30 705 obtained during the simulation depending on the similarity of the individuals.

31  
32 706

33  
34  
35 707 Figure 3. Inequities and vulnerabilities in RMDs: a palimpsest model (Title)

36  
37  
38 708 A model of vulnerability in layers analyzes how the determinants of health at different levels

39  
40 709 -genetic, biological, psychological, social and political- interact over time, creating barriers

41  
42 710 that lead to health inequity. (Figure caption)

43  
44  
45 711



Figure 1. Network and cluster analysis to describe groups with shared variables according to the syndemic framework in the indigenous population.

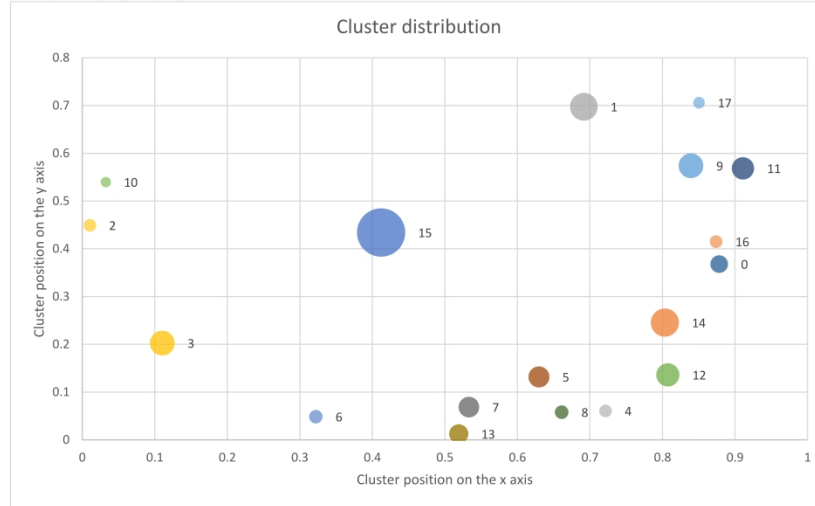

| Cluster                      | 1             | 11            | 13            | 14            | 15            | 16            |
|------------------------------|---------------|---------------|---------------|---------------|---------------|---------------|
| Total                        | 1062          | 694           | 514           | 1097          | 3234          | 224           |
| Health coverage              | Partial       | Full          | Partial       | Full          | Partial       | Private       |
| Joint biomechanical stress   | Unspecified   | High          | Medium        | High          | High          | High          |
| Gender                       | 60.36         | 63.83         | 57.39         | 64.18         | 65.31         | 57.14         |
| Age*                         | 37.32 (15.00) | 41.10 (21.68) | 39.26 (15.52) | 45.58 (18.60) | 44.68 (17.61) | 50.40 (17.39) |
| Formal schooling*            | 5.10 (3.56)   | 9.32 (5.52)   | 4.83 (4.39)   | 6.11 (4.55)   | 4.92 (3.74)   | 5.88 (4.63)   |
| Argentina                    | 82.86         | 0.00          | 28.40         | 0.00          | 11.87         | 8.04          |
| Colombia                     | 0.00          | 0.00          | 0.00          | 0.00          | 0.00          | 0.00          |
| Ecuador                      | 0.00          | 84.15         | 3.11          | 93.16         | 5.04          | 75.45         |
| Mexico                       | 7.72          | 15.85         | 19.07         | 6.84          | 60.36         | 16.52         |
| Venezuela                    | 9.42          | 0.00          | 49.42         | 0.00          | 22.73         | 0.00          |
| Rheumatic disease (any)      | 31.83         | 32.28         | 29.57         | 41.66         | 40.45         | 47.32         |
| Osteoarthritis               | 6.21          | 14.12         | 7.39          | 18.87         | 12.83         | 23.21         |
| Rheumatoid arthritis         | 3.01          | 3.17          | 2.72          | 1.73          | 2.94          | 2.68          |
| Backpain                     | 19.02         | 10.66         | 14.98         | 18.60         | 15.34         | 15.18         |
| RRPS                         | 1.98          | 4.18          | 2.53          | 7.29          | 2.29          | 5.36          |
| Musculoskeletal disorders    | 2.17          | 4.90          | 2.72          | 3.65          | 8.94          | 5.36          |
| Fibromyalgia                 | 0.09          | 3.46          | 0.58          | 4.92          | 1.67          | 5.80          |
| Others                       | 0.09          | 0.29          | 0.78          | 0.18          | 0.43          | 0.45          |
| Historical pain              | 44.82         | 40.63         | 36.19         | 49.95         | 52.26         | 54.91         |
| Non-traumatic pain (7 days)  | 20.72         | 7.49          | 17.32         | 10.12         | 27.40         | 13.84         |
| Physical disability (HAQ-DI) | 3.48          | 12.82         | 4.28          | 11.39         | 3.96          | 7.14          |
| Diabetes mellitus            | 5.18          | 5.04          | 3.89          | 5.10          | 6.77          | 7.14          |
| High blood pressure          | 15.35         | 10.23         | 7.78          | 12.94         | 13.42         | 17.41         |
| Cardiovascular disease       | 5.74          | 1.30          | 2.72          | 3.01          | 3.34          | 4.02          |
| Smoking                      | 18.74         | 3.46          | 16.15         | 4.19          | 9.86          | 7.14          |
| Alcoholism                   | 14.69         | 10.95         | 19.84         | 14.77         | 23.13         | 23.66         |
| Anxiety/depression           | 4.14          | 39.77         | 4.09          | 49.59         | 22.70         | 43.75         |
| No comorbidities             | 42.09         | 34.44         | 53.89         | 27.53         | 35.44         | 23.21         |

RRPS: Rheumatic regional pain syndromes. Health Assessment Questionnaire-Disability Index (HAQ-DI) cut-off point of greater than 0.8.

\* Age and formal schooling show mean value (standard deviation)

\*\*Circle size represent amount of individual per cluster for visual comparison. The cluster positions are the result of the network simulation, the position of each cluster is obtained during the simulation depending on the similarity of the individuals.

Figure 1. Network and cluster analysis to describe groups with shared variables according to the syndemic framework in the indigenous population. (Title)  
RRPS: Rheumatic regional pain syndromes. Health Assessment Questionnaire-Disability Index (HAQ-DI) cut-off point of greater than 0.8.

\* Age and formal schooling show mean value (standard deviation)

\*\*Circle size represents the number of individuals per cluster for visual comparison. The cluster positions are the result of the network simulation; the position of each cluster is obtained during the simulation depending on the similarity of the individuals.

548x710mm (236 x 236 DPI)

Figure 2. Network and cluster analysis to describe groups with shared variables according to the syndemic framework in the non-indigenous population

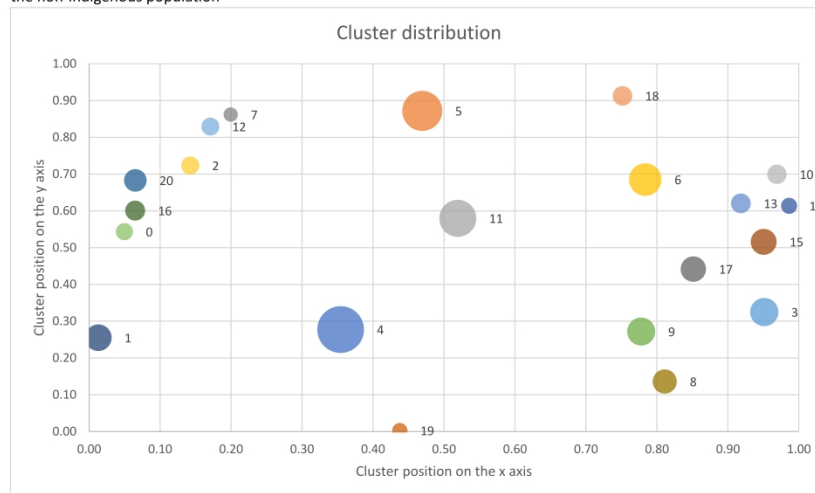

| Cluster                      | 4             | 7             | 8                | 9             | 10               | 17            |
|------------------------------|---------------|---------------|------------------|---------------|------------------|---------------|
| Total                        | 4586          | 429           | 1223             | 1647          | 789              | 1353          |
| Health coverage              | Partial       | Public Full   | Partial coverage | Full coverage | Partial coverage | Private       |
| Joint biomechanical stress   | Unspecified   | High          | Medium           | High          | High             | High          |
| Gender                       | 78.28         | 59.67         | 78.00            | 50.27         | 61.22            | 87.66         |
| Age*                         | 46.99 (17.78) | 40.82 (16.70) | 44.45 (17.07)    | 44.11 (18.83) | 41.36 (17.53)    | 47.33 (17.15) |
| Formal schooling*            | 7.78 (4.08)   | 7.85 (4.29)   | 7.92 (4.53)      | 11.38 (5.14)  | 8.69 (4.65)      | 7.50 (5.09)   |
| Argentina                    | 0.00          | 0.00          | 0.00             | 0.00          | 0.00             | 0.00          |
| Colombia                     | 50.81         | 0.00          | 4.17             | 34.30         | 0.13             | 0.00          |
| Ecuador                      | 0.00          | 0.70          | 36.96            | 42.74         | 0.00             | 0.00          |
| Mexico                       | 39.77         | 99.30         | 58.87            | 22.95         | 99.62            | 100.00        |
| Venezuela                    | 9.42          | 0.00          | 0.00             | 0.00          | 0.25             | 0.00          |
| Rheumatic disease (any)      | 40.49         | 29.84         | 42.44            | 41.89         | 20.41            | 13.90         |
| Osteoarthritis               | 11.32         | 9.09          | 7.44             | 5.59          | 7.48             | 4.95          |
| Rheumatoid arthritis         | 2.46          | 2.80          | 1.88             | 1.82          | 3.55             | 4.07          |
| Backpain                     | 6.56          | 9.09          | 4.74             | 3.10          | 4.94             | 1.85          |
| RRPS                         | 23.92         | 2.80          | 26.17            | 34.00         | 1.14             | 0.89          |
| Musculoskeletal disorders    | 4.49          | 5.36          | 2.04             | 2.43          | 2.92             | 2.00          |
| Fibromyalgia                 | 0.41          | 1.17          | 1.88             | 0.67          | 0.76             | 0.07          |
| Others                       | 0.37          | 0.23          | 0.25             | 0.79          | 0.13             | 0.30          |
| Historical pain              | 57.78         | 20.51         | 35.32            | 47.54         | 23.32            | 17.44         |
| Non-traumatic pain (7 days)  | 38.60         | 28.67         | 33.69            | 27.26         | 23.19            | 15.08         |
| Physical disability (HAQ-DI) | 7.76          | 15.15         | 14.23            | 6.44          | 13.05            | 12.34         |
| Diabetes mellitus            | 8.26          | 7.93          | 8.91             | 6.86          | 9.38             | 10.20         |
| High blood pressure          | 22.68         | 13.75         | 19.46            | 18.40         | 17.87            | 20.40         |
| Cardiovascular disease       | 4.93          | 3.26          | 3.92             | 4.80          | 3.68             | 2.14          |
| Smoking                      | 17.84         | 10.26         | 16.11            | 32.54         | 7.48             | 0.81          |
| Alcoholism                   | 4.91          | 6.76          | 3.19             | 2.37          | 4.31             | 0.59          |
| Anxiety/depression           | 3.92          | 7.46          | 12.43            | 6.07          | 9.76             | 8.50          |
| No comorbidities             | 38.03         | 43.36         | 34.10            | 38.13         | 46.01            | 58.39         |

RRPS: Rheumatic regional pain syndromes. Health Assessment Questionnaire-Disability Index (HAQ-DI) cut-off point of greater than 0.8.

\* Age and formal schooling show mean value (standard deviation)

\*\*Circle size represent amount of individual per cluster for visual comparison. The cluster positions are the result of the network simulation, the position of each cluster is obtained during the simulation depending on the similarity of the individuals.

Figure 2. Network and cluster analysis to describe groups with shared variables according to the syndemic framework in the non-indigenous population. (Title)RRPS: Rheumatic regional pain syndromes. Health Assessment Questionnaire-Disability Index (HAQ-DI) cut-off point of greater than 0.8.\* Age and formal schooling show mean value (standard deviation)\*\*Circle size represents the number of individuals per cluster for visual comparison. The cluster positions are the result of the network simulation; the position of each cluster is obtained during the simulation depending on the similarity of the individuals.

548x710mm (236 x 236 DPI)



Figure 3. Inequities and vulnerabilities in RMDs: a palimpsest model

| Layer of Inequity | Vulnerabilities               | Examples                                       |
|-------------------|-------------------------------|------------------------------------------------|
| Layer 5           | Political vulnerabilities     | Healthcare system                              |
| Layer 4           | Social vulnerabilities        | Lifestyle and Ethnic minorities                |
| Layer 3           | Psychological vulnerabilities | Mental illness                                 |
| Layer 2           | Biological vulnerabilities    | Individual patient and disease characteristics |
| Layer 1           | Genetic vulnerability         | Genetic predispositions                        |

A model of vulnerability in layers analyzes how the determinants of health at different levels—genetic, biological, psychological, social and political—interact over time, creating barriers that lead to health inequity.

Figure 3. Inequities and vulnerabilities in MDs: a palimpsest model.(Title)

A model of vulnerability in layers analyzes how the determinants of health at different levels- genetic, biological, psychological, social and political-interact over time, creating barriers that lead to health inequity.

177x114mm (300 x 300 DPI)

**Supplementary Table.** Comparison of sociodemographic characteristics, health coverage, rheumatic diagnosis, pain, disability and comorbidities between indigenous and non-indigenous groups from Ecuador, Mexico and Argentina

|                                                                                | Indigenous<br>n (%)<br>4599 (50.00) | Non-<br>indigenous<br>n (%)<br>4599 (50.00) | Totals<br>n (%)<br>9198 (100.00) | p      |
|--------------------------------------------------------------------------------|-------------------------------------|---------------------------------------------|----------------------------------|--------|
| Gender (female)                                                                | 2788 (60.62)                        | 2729 (59.34)                                | 5517 (59.98)                     | 0.217  |
| Age (years), mean (SD)                                                         | 42.90 (18.71)                       | 42.98 (17.58)                               | 42.94 (18.16)                    | 0.163  |
| Urban setting                                                                  | 832 (18.09)                         | 3624 (78.80)                                | 4456 (48.45)                     | <0.001 |
| Educational level, mean number of years (SD)                                   | 6.74 (5.17)                         | 9.17 (5.15)                                 | 7.95 (5.30)                      | <0.001 |
| Health coverage *                                                              |                                     |                                             |                                  |        |
| Full                                                                           | 1351 (29.38)                        | 551 (11.98)                                 | 1902 (20.68)                     | <0.001 |
| Partial                                                                        | 2536 (55.14)                        | 2401 (52.21)                                | 4937 (53.67)                     | <0.01  |
| Private                                                                        | 245 (5.33)                          | 501 (10.89)                                 | 746 (8.11)                       | <0.001 |
| Other**                                                                        | 171 (3.72)                          | 34 (0.74)                                   | 205 (2.23)                       | <0.001 |
| Joint biomechanical stress ***                                                 |                                     |                                             |                                  |        |
| High                                                                           | 2162 (47.01)                        | 1176 (25.57)                                | 3338 (36.29)                     | <0.001 |
| Medium                                                                         | 534 (11.61)                         | 503 (10.94)                                 | 1037 (11.27)                     | 0.323  |
| Low                                                                            | 1472 (32.01)                        | 1574 (34.22)                                | 3046 (33.12)                     | 0.025  |
| Unspecified                                                                    | 254 (5.52)                          | 267 (5.81)                                  | 521 (5.66)                       | 0.588  |
| Rheumatic disease                                                              |                                     |                                             |                                  |        |
| Totals                                                                         | 1428 (31.05)                        | 1521 (33.07)                                | 2949 (32.06)                     | 0.040  |
| Osteoarthritis                                                                 | 616 (13.39)                         | 334 (7.26)                                  | 950 (10.33)                      | <0.001 |
| Rheumatoid arthritis                                                           | 104 (2.26)                          | 80 (1.74)                                   | 184 (2.00)                       | 0.087  |
| Back pain                                                                      | 521 (11.33)                         | 138 (3.00)                                  | 659 (7.16)                       | <0.001 |
| RRPS                                                                           | 142 (3.09)                          | 895 (19.46)                                 | 1037 (11.27)                     | <0.001 |
| Musculoskeletal disorders                                                      | 170 (3.70)                          | 83 (1.80)                                   | 253 (2.75)                       | <0.001 |
| Fibromyalgia                                                                   | 89 (1.94)                           | 50 (1.09)                                   | 139 (1.51)                       | <0.01  |
| Other ****                                                                     | 26 (0.57)                           | 21 (0.46)                                   | 47 (0.51)                        | 0.559  |
| Pain                                                                           |                                     |                                             |                                  |        |
| Historical pain                                                                | 1839 (39.99)                        | 1487 (32.33)                                | 3326 (36.16)                     | <0.001 |
| Non-traumatic pain (7 days)                                                    | 819 (17.81)                         | 1012 (22.00)                                | 1831 (19.91)                     | <0.001 |
| Physical disability (Health Assessment Questionnaire-Disability Index (HAQ-DI) |                                     |                                             |                                  |        |
| HAQ $\geq$ 0.8                                                                 | 308 (6.70)                          | 375 (8.15)                                  | 683 (7.43)                       | <0.01  |
| Comorbidities                                                                  |                                     |                                             |                                  |        |
| Diabetes mellitus                                                              | 236 (5.13)                          | 326 (7.09)                                  | 562 (6.11)                       | <0.001 |
| High blood pressure                                                            | 528 (11.48)                         | 855 (18.59)                                 | 1383 (15.04)                     | <0.001 |
| Cardiovascular disease                                                         | 142 (3.09)                          | 150 (3.26)                                  | 292 (3.17)                       | 0.677  |
| Smoking                                                                        | 332 (7.22)                          | 697 (15.16)                                 | 1029 (11.19)                     | <0.001 |
| Alcoholism                                                                     | 643 (13.98)                         | 198 (4.31)                                  | 841 (9.14)                       | <0.001 |
| Anxiety/depression                                                             | 913 (19.85)                         | 501 (10.89)                                 | 1414 (15.37)                     | <0.001 |
| No comorbidities                                                               | 2261 (49.16)                        | 1991 (43.29)                                | 4252 (46.23)                     | <0.001 |

\* Missing data: 296 (6.44%) indigenous and 1112 (24.18%) non-indigenous (total 1408 (15.31%))

\*\* Other: Traditional healthcare

\*\*\* Missing data: 177 (3.85%) indigenous and 1079 (23.46%) non-indigenous (total 1256 (13.65%))

\*\*\*\* Others: *Indigenous*: 18 ankylosing spondylitis, 4 gout, 1 scleroderma and 2 psoriasis. *Non-indigenous*: 2 ankylosing spondylitis, 14 gout, and 1 psoriasis.

## STROBE Statement—checklist of items that should be included in reports of observational studies

|                              | Item No | Recommendation                                                                                                                                                                                                                                                                                                                                                                                                                                                         | Page No        |
|------------------------------|---------|------------------------------------------------------------------------------------------------------------------------------------------------------------------------------------------------------------------------------------------------------------------------------------------------------------------------------------------------------------------------------------------------------------------------------------------------------------------------|----------------|
| <b>Title and abstract</b>    | 1       | (a) Indicate the study's design with a commonly used term in the title or the abstract                                                                                                                                                                                                                                                                                                                                                                                 | 6              |
|                              |         | (b) Provide in the abstract an informative and balanced summary of what was done and what was found                                                                                                                                                                                                                                                                                                                                                                    | 6,7            |
| <b>Introduction</b>          |         |                                                                                                                                                                                                                                                                                                                                                                                                                                                                        |                |
| Background/rationale         | 2       | Explain the scientific background and rationale for the investigation being reported                                                                                                                                                                                                                                                                                                                                                                                   | 8,10           |
| Objectives                   | 3       | State specific objectives, including any prespecified hypotheses                                                                                                                                                                                                                                                                                                                                                                                                       | 10             |
| <b>Methods</b>               |         |                                                                                                                                                                                                                                                                                                                                                                                                                                                                        |                |
| Study design                 | 4       | Present key elements of study design early in the paper                                                                                                                                                                                                                                                                                                                                                                                                                | 10             |
| Setting                      | 5       | Describe the setting, locations, and relevant dates, including periods of recruitment, exposure, follow-up, and data collection                                                                                                                                                                                                                                                                                                                                        | 10,11          |
| Participants                 | 6       | (a) <i>Cohort study</i> —Give the eligibility criteria, and the sources and methods of selection of participants. Describe methods of follow-up<br><i>Case-control study</i> —Give the eligibility criteria, and the sources and methods of case ascertainment and control selection. Give the rationale for the choice of cases and controls<br><i>Cross-sectional study</i> —Give the eligibility criteria, and the sources and methods of selection of participants | 11             |
|                              |         | (b) <i>Cohort study</i> —For matched studies, give matching criteria and number of exposed and unexposed<br><i>Case-control study</i> —For matched studies, give matching criteria and the number of controls per case                                                                                                                                                                                                                                                 | Not Applicable |
| Variables                    | 7       | Clearly define all outcomes, exposures, predictors, potential confounders, and effect modifiers. Give diagnostic criteria, if applicable                                                                                                                                                                                                                                                                                                                               | 11,12          |
| Data sources/<br>measurement | 8*      | For each variable of interest, give sources of data and details of methods of assessment (measurement). Describe comparability of assessment methods if there is more than one group                                                                                                                                                                                                                                                                                   | 12             |
| Bias                         | 9       | Describe any efforts to address potential sources of bias                                                                                                                                                                                                                                                                                                                                                                                                              | 14             |
| Study size                   | 10      | Explain how the study size was arrived at                                                                                                                                                                                                                                                                                                                                                                                                                              | 13             |
| Quantitative variables       | 11      | Explain how quantitative variables were handled in the analyses. If applicable, describe which groupings were chosen and why                                                                                                                                                                                                                                                                                                                                           | 12             |
| Statistical methods          | 12      | (a) Describe all statistical methods, including those used to control for confounding                                                                                                                                                                                                                                                                                                                                                                                  | 12,13,14       |
|                              |         | (b) Describe any methods used to examine subgroups and interactions                                                                                                                                                                                                                                                                                                                                                                                                    | 13             |
|                              |         | (c) Explain how missing data were addressed                                                                                                                                                                                                                                                                                                                                                                                                                            | Not Applicable |
|                              |         | (d) <i>Cohort study</i> —If applicable, explain how loss to follow-up was addressed<br><i>Case-control study</i> —If applicable, explain how matching of cases and controls was addressed                                                                                                                                                                                                                                                                              | Not Applicable |

1  
2  
3  
4  
5  
6  
7  
8  
9  
10  
11  
12  
13  
14  
15  
16  
17  
18  
19  
20  
21  
22  
23  
24  
25  
26  
27  
28  
29  
30  
31  
32  
33  
34  
35  
36  
37  
38  
39  
40  
41  
42  
43  
44  
45  
46  
47  
48  
49  
50  
51  
52  
53  
54  
55  
56  
57  
58  
59  
60

*Cross-sectional study*—If applicable, describe analytical methods taking account of sampling strategy

(e) Describe any sensitivity analyses

|    |
|----|
|    |
| 13 |

Continued on next page

For peer review only

1  
2  
3  
4  
5  
6  
7  
8  
9  
10  
11  
12  
13  
14  
15  
16  
17  
18  
19  
20  
21  
22  
23  
24  
25  
26  
27  
28  
29  
30  
31  
32  
33  
34  
35  
36  
37  
38  
39  
40  
41  
42  
43  
44  
45  
46  
47  
48  
49  
50  
51  
52  
53  
54  
55  
56  
57  
58  
59  
60**Results**

|                  |     |                                                                                                                                                                                                              |                |
|------------------|-----|--------------------------------------------------------------------------------------------------------------------------------------------------------------------------------------------------------------|----------------|
| Participants     | 13* | (a) Report numbers of individuals at each stage of study—eg numbers potentially eligible, examined for eligibility, confirmed eligible, included in the study, completing follow-up, and analysed            | 14             |
|                  |     | (b) Give reasons for non-participation at each stage                                                                                                                                                         | Not Applicable |
|                  |     | (c) Consider use of a flow diagram                                                                                                                                                                           | Not Applicable |
| Descriptive data | 14* | (a) Give characteristics of study participants (eg demographic, clinical, social) and information on exposures and potential confounders                                                                     | 14             |
|                  |     | (b) Indicate number of participants with missing data for each variable of interest                                                                                                                          | 17             |
|                  |     | (c) <i>Cohort study</i> —Summarise follow-up time (eg, average and total amount)                                                                                                                             | Not Applicable |
| Outcome data     | 15* | <i>Cohort study</i> —Report numbers of outcome events or summary measures over time                                                                                                                          | Not Applicable |
|                  |     | <i>Case-control study</i> —Report numbers in each exposure category, or summary measures of exposure                                                                                                         | Not Applicable |
|                  |     | <i>Cross-sectional study</i> —Report numbers of outcome events or summary measures                                                                                                                           | 15-16          |
| Main results     | 16  | (a) Give unadjusted estimates and, if applicable, confounder-adjusted estimates and their precision (eg, 95% confidence interval). Make clear which confounders were adjusted for and why they were included | 17,18,19       |
|                  |     | (b) Report category boundaries when continuous variables were categorized                                                                                                                                    | Not Applicable |
|                  |     | (c) If relevant, consider translating estimates of relative risk into absolute risk for a meaningful time period                                                                                             | 19             |
| Other analyses   | 17  | Report other analyses done—eg analyses of subgroups and interactions, and sensitivity analyses                                                                                                               | 20,21          |

**Discussion**

|                  |    |                                                                                                                                                                            |          |
|------------------|----|----------------------------------------------------------------------------------------------------------------------------------------------------------------------------|----------|
| Key results      | 18 | Summarise key results with reference to study objectives                                                                                                                   | 21,22,23 |
| Limitations      | 19 | Discuss limitations of the study, taking into account sources of potential bias or imprecision. Discuss both direction and magnitude of any potential bias                 | 23       |
| Interpretation   | 20 | Give a cautious overall interpretation of results considering objectives, limitations, multiplicity of analyses, results from similar studies, and other relevant evidence | 23       |
| Generalisability | 21 | Discuss the generalisability (external validity) of the study results                                                                                                      | 24       |

**Other information**

|         |    |                                                                                                                                                               |    |
|---------|----|---------------------------------------------------------------------------------------------------------------------------------------------------------------|----|
| Funding | 22 | Give the source of funding and the role of the funders for the present study and, if applicable, for the original study on which the present article is based | 25 |
|---------|----|---------------------------------------------------------------------------------------------------------------------------------------------------------------|----|

\*Give information separately for cases and controls in case-control studies and, if applicable, for exposed and unexposed groups in cohort and cross-sectional studies.

**Note:** An Explanation and Elaboration article discusses each checklist item and gives methodological background and published examples of transparent reporting. The STROBE checklist is best used in conjunction with this article (freely available on the Web sites of PLoS Medicine at <http://www.plosmedicine.org/>, Annals of Internal Medicine at

1  
2 <http://www.annals.org/>, and *Epidemiology* at <http://www.epidem.com/>). Information on the STROBE Initiative is  
3 available at [www.strobe-statement.org](http://www.strobe-statement.org).  
4  
5  
6  
7  
8  
9  
10  
11  
12  
13  
14  
15  
16  
17  
18  
19  
20  
21  
22  
23  
24  
25  
26  
27  
28  
29  
30  
31  
32  
33  
34  
35  
36  
37  
38  
39  
40  
41  
42  
43  
44  
45  
46  
47  
48  
49  
50  
51  
52  
53  
54  
55  
56  
57  
58  
59  
60

For peer review only
