# Supplementary material for: Inequity and vulnerability in Latin American Indigenous and non-Indigenous populations with rheumatic diseases: a syndemic approach
Source: PubMed Central journal article supplement — BMJ Open. 2023 Mar 23;13(3):e069246. doi: 10.1136/bmjopen-2022-069246 (PMC10040077; doi:10.1136/bmjopen-2022-069246), 2023-03-23
Supplement: bmjopen-2022-069246supp001.pdf [file bmjopen-2022-069246supp001.pdf]

**Supplementary Table.** Comparison of sociodemographic characteristics, health coverage, rheumatic diagnosis, pain, disability and comorbidities between indigenous and non-indigenous groups from Ecuador, Mexico and Argentina

|                                                                                | Indigenous<br>n (%)<br>4599 (50.00) | Non-<br>indigenous<br>n (%)<br>4599 (50.00) | Totals<br>n (%)<br>9198 (100.00) | p      |
|--------------------------------------------------------------------------------|-------------------------------------|---------------------------------------------|----------------------------------|--------|
| Gender (female)                                                                | 2788 (60.62)                        | 2729 (59.34)                                | 5517 (59.98)                     | 0.217  |
| Age (years), mean (SD)                                                         | 42.90 (18.71)                       | 42.98 (17.58)                               | 42.94 (18.16)                    | 0.163  |
| Urban setting                                                                  | 832 (18.09)                         | 3624 (78.80)                                | 4456 (48.45)                     | <0.001 |
| Educational level, mean number of years (SD)                                   | 6.74 (5.17)                         | 9.17 (5.15)                                 | 7.95 (5.30)                      | <0.001 |
| Health coverage *                                                              |                                     |                                             |                                  |        |
| Full                                                                           | 1351 (29.38)                        | 551 (11.98)                                 | 1902 (20.68)                     | <0.001 |
| Partial                                                                        | 2536 (55.14)                        | 2401 (52.21)                                | 4937 (53.67)                     | <0.01  |
| Private                                                                        | 245 (5.33)                          | 501 (10.89)                                 | 746 (8.11)                       | <0.001 |
| Other**                                                                        | 171 (3.72)                          | 34 (0.74)                                   | 205 (2.23)                       | <0.001 |
| Joint biomechanical stress ***                                                 |                                     |                                             |                                  |        |
| High                                                                           | 2162 (47.01)                        | 1176 (25.57)                                | 3338 (36.29)                     | <0.001 |
| Medium                                                                         | 534 (11.61)                         | 503 (10.94)                                 | 1037 (11.27)                     | 0.323  |
| Low                                                                            | 1472 (32.01)                        | 1574 (34.22)                                | 3046 (33.12)                     | 0.025  |
| Unspecified                                                                    | 254 (5.52)                          | 267 (5.81)                                  | 521 (5.66)                       | 0.588  |
| Rheumatic disease                                                              |                                     |                                             |                                  |        |
| Totals                                                                         | 1428 (31.05)                        | 1521 (33.07)                                | 2949 (32.06)                     | 0.040  |
| Osteoarthritis                                                                 | 616 (13.39)                         | 334 (7.26)                                  | 950 (10.33)                      | <0.001 |
| Rheumatoid arthritis                                                           | 104 (2.26)                          | 80 (1.74)                                   | 184 (2.00)                       | 0.087  |
| Back pain                                                                      | 521 (11.33)                         | 138 (3.00)                                  | 659 (7.16)                       | <0.001 |
| RRPS                                                                           | 142 (3.09)                          | 895 (19.46)                                 | 1037 (11.27)                     | <0.001 |
| Musculoskeletal disorders                                                      | 170 (3.70)                          | 83 (1.80)                                   | 253 (2.75)                       | <0.001 |
| Fibromyalgia                                                                   | 89 (1.94)                           | 50 (1.09)                                   | 139 (1.51)                       | <0.01  |
| Other ****                                                                     | 26 (0.57)                           | 21 (0.46)                                   | 47 (0.51)                        | 0.559  |
| Pain                                                                           |                                     |                                             |                                  |        |
| Historical pain                                                                | 1839 (39.99)                        | 1487 (32.33)                                | 3326 (36.16)                     | <0.001 |
| Non-traumatic pain (7 days)                                                    | 819 (17.81)                         | 1012 (22.00)                                | 1831 (19.91)                     | <0.001 |
| Physical disability (Health Assessment Questionnaire-Disability Index (HAQ-DI) |                                     |                                             |                                  |        |
| HAQ ≥ 0.8                                                                      | 308 (6.70)                          | 375 (8.15)                                  | 683 (7.43)                       | <0.01  |
| Comorbidities                                                                  |                                     |                                             |                                  |        |
| Diabetes mellitus                                                              | 236 (5.13)                          | 326 (7.09)                                  | 562 (6.11)                       | <0.001 |
| High blood pressure                                                            | 528 (11.48)                         | 855 (18.59)                                 | 1383 (15.04)                     | <0.001 |
| Cardiovascular disease                                                         | 142 (3.09)                          | 150 (3.26)                                  | 292 (3.17)                       | 0.677  |
| Smoking                                                                        | 332 (7.22)                          | 697 (15.16)                                 | 1029 (11.19)                     | <0.001 |
| Alcoholism                                                                     | 643 (13.98)                         | 198 (4.31)                                  | 841 (9.14)                       | <0.001 |
| Anxiety/depression                                                             | 913 (19.85)                         | 501 (10.89)                                 | 1414 (15.37)                     | <0.001 |
| No comorbidities                                                               | 2261 (49.16)                        | 1991 (43.29)                                | 4252 (46.23)                     | <0.001 |

\* Missing data: 296 (6.44%) indigenous and 1112 (24.18%) non-indigenous (total 1408 (15.31%))

\*\* Other: Traditional healthcare

\*\*\* Missing data: 177 (3.85%) indigenous and 1079 (23.46%) non-indigenous (total 1256 (13.65%))

\*\*\*\* Others: *Indigenous*: 18 ankylosing spondylitis, 4 gout, 1 scleroderma and 2 psoriasis. *Non-indigenous*: 2 ankylosing spondylitis, 14 gout, and 1 psoriasis.
